# Supplementary material for: Cis-eQTL-based trans-ethnic meta-analysis reveals novel genes associated with breast cancer risk
Source: PubMed Central journal article supplement (PMC5391966; doi:10.1371/journal.pgen.1006690), 2017-03-31
Supplement: pgen.1006690.s001.pdf [file pgen.1006690.s001.pdf]

**(A) Breast Tissue Expression**

| Gene           | Location <sup>a</sup> | # SNPs in Prediction | Imputation Quality <sup>b</sup> | Discovery U4C Meta-analysis |                       | UK Biobank Replication |                       | Joint Meta-analysis |                       |
|----------------|-----------------------|----------------------|---------------------------------|-----------------------------|-----------------------|------------------------|-----------------------|---------------------|-----------------------|
|                |                       |                      |                                 | Beta (SE)                   | <i>p</i> -value       | Beta (SE)              | <i>p</i> -value       | Beta (SE)           | <i>p</i> -value       |
| <i>RCCD1</i>   | 15q26.1               | 24                   | 0.16                            | -0.11 (0.038)               | 5.8x10 <sup>-03</sup> | -0.24 (0.057)          | 2.6x10 <sup>-05</sup> | -0.15 (0.032)       | 3.6x10 <sup>-06</sup> |
| <i>DHODH</i>   | 16q22.2               | 7                    | 0.026                           | -0.52 (0.12)                | 2.4x10 <sup>-05</sup> | -0.29 (0.15)           | 5.6x10 <sup>-02</sup> | -0.43 (0.095)       | 7.1x10 <sup>-06</sup> |
| <i>ANKLE1</i>  | 19p13.11              | 6                    | 0.081                           | 0.19 (0.093)                | 4.4x10 <sup>-02</sup> | 0.43 (0.12)            | 1.9x10 <sup>-04</sup> | 0.28 (0.072)        | 9.3x10 <sup>-05</sup> |
| <i>CASP8</i>   | 2q33.1                | 12                   | 0.24                            | -0.16 (0.042)               | 1.9x10 <sup>-04</sup> | -0.069 (0.058)         | 2.3x10 <sup>-01</sup> | -0.13 (0.034)       | 1.9x10 <sup>-04</sup> |
| <i>ZNF155</i>  | 19q13.31              | 41                   | 0.11                            | 0.15 (0.055)                | 7.6x10 <sup>-03</sup> | 0.13 (0.069)           | 5.1x10 <sup>-02</sup> | 0.14 (0.043)        | 9.5x10 <sup>-04</sup> |
| <i>SLC27A2</i> | 15q21.2               | 43                   | 0.063                           | 0.15 (0.050)                | 2.2x10 <sup>-03</sup> | 0.080 (0.056)          | 1.5x10 <sup>-01</sup> | 0.12 (0.037)        | 1.2x10 <sup>-03</sup> |
| <i>TSNARE1</i> | 8q24.3                | 26                   | 0.14                            | 0.12 (0.037)                | 1.2x10 <sup>-03</sup> | 0.044 (0.058)          | 4.5x10 <sup>-01</sup> | 0.098 (0.031)       | 1.6x10 <sup>-03</sup> |
| <i>XRCC2</i>   | 7q36.1                | 8                    | 0.11                            | 0.24 (0.084)                | 4.3x10 <sup>-03</sup> | 0.14 (0.088)           | 1.2x10 <sup>-01</sup> | 0.19 (0.061)        | 1.7x10 <sup>-03</sup> |
| <i>DDX43</i>   | 6q13                  | 40                   | 0.023                           | -0.17 (0.049)               | 4.5x10 <sup>-04</sup> | 0.010 (0.10)           | 9.2x10 <sup>-01</sup> | -0.14 (0.044)       | 1.8x10 <sup>-03</sup> |
| <i>WDSUB1</i>  | 2q24.2                | 10                   | 0.1                             | 0.16 (0.067)                | 1.7x10 <sup>-02</sup> | 0.15 (0.080)           | 5.8x10 <sup>-02</sup> | 0.16 (0.052)        | 2.4x10 <sup>-03</sup> |
| <i>SV2A</i>    | 1q21.2                | 4                    | 0.022                           | -1.2 (0.37)                 | 1.7x10 <sup>-03</sup> | -0.38 (0.58)           | 5.1x10 <sup>-01</sup> | -0.94 (0.31)        | 2.7x10 <sup>-03</sup> |
| <i>ZNF83</i>   | 19q13.41              | 43                   | 0.39                            | 0.079 (0.027)               | 3.6x10 <sup>-03</sup> | 0.038 (0.038)          | 3.2x10 <sup>-01</sup> | 0.065 (0.022)       | 3.2x10 <sup>-03</sup> |
| <i>RABGEF1</i> | 7q11.21               | 37                   | 0.16                            | -0.11 (0.043)               | 1.3x10 <sup>-02</sup> | -0.093 (0.058)         | 1.1x10 <sup>-01</sup> | -0.1 (0.035)        | 3.2x10 <sup>-03</sup> |
| <i>CAMTA2</i>  | 17p13.2               | 17                   | 0.022                           | -0.34 (0.10)                | 5.5x10 <sup>-04</sup> | -0.046 (0.12)          | 7.1x10 <sup>-01</sup> | -0.23 (0.077)       | 3.5x10 <sup>-03</sup> |
| <i>STRC</i>    | 15q15.3               | 18                   | 0.06                            | -0.24 (0.086)               | 4.7x10 <sup>-03</sup> | -0.11 (0.095)          | 2.4x10 <sup>-01</sup> | -0.18 (0.064)       | 3.9x10 <sup>-03</sup> |
| <i>SMAD9</i>   | 13q13.3               | 5                    | 0.037                           | -0.24 (0.098)               | 1.3x10 <sup>-02</sup> | -0.2 (0.14)            | 1.5x10 <sup>-01</sup> | -0.23 (0.080)       | 4.2x10 <sup>-03</sup> |
| <i>DCAF4</i>   | 14q24.2               | 12                   | 0.19                            | 0.11 (0.049)                | 2.2x10 <sup>-02</sup> | 0.10 (0.061)           | 9.0x10 <sup>-02</sup> | 0.11 (0.038)        | 4.4x10 <sup>-03</sup> |
| <i>GYPE</i>    | 4q31.21               | 34                   | 0.036                           | 0.20 (0.065)                | 2.6x10 <sup>-03</sup> | 0.063 (0.084)          | 4.5x10 <sup>-01</sup> | 0.15 (0.051)        | 4.5x10 <sup>-03</sup> |
| <i>JAKMIP3</i> | 10q26.3               | 89                   | 0.065                           | -0.068 (0.031)              | 3.1x10 <sup>-02</sup> | -0.078 (0.042)         | 6.3x10 <sup>-02</sup> | -0.071 (0.025)      | 4.5x10 <sup>-03</sup> |
| <i>SCARF1</i>  | 17p13.3               | 53                   | 0.12                            | -0.11 (0.048)               | 1.8x10 <sup>-02</sup> | -0.091 (0.059)         | 1.2x10 <sup>-01</sup> | -0.1 (0.037)        | 4.9x10 <sup>-03</sup> |
| <i>XCL2</i>    | 1q24.2                | 18                   | 0.056                           | -0.24 (0.10)                | 1.4x10 <sup>-02</sup> | -0.16 (0.11)           | 1.4x10 <sup>-01</sup> | -0.21 (0.073)       | 5.2x10 <sup>-03</sup> |
| <i>SDPR</i>    | 2q32.3                | 9                    | 0.024                           | -0.28 (0.11)                | 1.6x10 <sup>-02</sup> | -0.2 (0.13)            | 1.4x10 <sup>-01</sup> | -0.24 (0.087)       | 5.2x10 <sup>-03</sup> |
| <i>DVL1</i>    | 1p36.33               | 26                   | 0.019                           | 0.17 (0.068)                | 1.1x10 <sup>-02</sup> | 0.11 (0.086)           | 2.2x10 <sup>-01</sup> | 0.15 (0.053)        | 5.7x10 <sup>-03</sup> |
| <i>SMDT1</i>   | 22q13.2               | 22                   | 0.61                            | -0.051 (0.022)              | 2.2x10 <sup>-02</sup> | -0.043 (0.028)         | 1.2x10 <sup>-01</sup> | -0.048 (0.017)      | 5.7x10 <sup>-03</sup> |

| Gene            | Location <sup>a</sup> | # SNPs in  | Imputation           | Discovery U4C Meta-analysis |                       | UK Biobank Replication |                       | Joint Meta-analysis |                       |
|-----------------|-----------------------|------------|----------------------|-----------------------------|-----------------------|------------------------|-----------------------|---------------------|-----------------------|
|                 |                       | Prediction | Quality <sup>b</sup> | Beta (SE)                   | p-value               | Beta (SE)              | p-value               | Beta (SE)           | p-value               |
| <i>ZNF181</i>   | 19q13.11              | 9          | 0.23                 | -0.11 (0.040)               | 4.8x10 <sup>-03</sup> | -0.045 (0.053)         | 4.0x10 <sup>-01</sup> | -0.088 (0.032)      | 5.8x10 <sup>-03</sup> |
| <i>P2RY11</i>   | 19p13.2               | 7          | 0.049                | 0.21 (0.074)                | 4.0x10 <sup>-03</sup> | 0.067 (0.12)           | 5.6x10 <sup>-01</sup> | 0.17 (0.062)        | 6.1x10 <sup>-03</sup> |
| <i>PIK3C3</i>   | 18q12.3               | 28         | 0.028                | -0.13 (0.057)               | 2.3x10 <sup>-02</sup> | -0.14 (0.092)          | 1.3x10 <sup>-01</sup> | -0.13 (0.048)       | 6.2x10 <sup>-03</sup> |
| <i>FAM170A</i>  | 5q23.1                | 30         | 0.066                | 0.12 (0.055)                | 3.5x10 <sup>-02</sup> | 0.10 (0.060)           | 8.5x10 <sup>-02</sup> | 0.11 (0.041)        | 6.5x10 <sup>-03</sup> |
| <i>KCTD18</i>   | 2q33.1                | 21         | 0.047                | -0.12 (0.058)               | 4.2x10 <sup>-02</sup> | -0.14 (0.076)          | 7.6x10 <sup>-02</sup> | -0.12 (0.046)       | 7.1x10 <sup>-03</sup> |
| <i>MAN2C1</i>   | 15q24.2               | 26         | 0.56                 | -0.067 (0.023)              | 4.1x10 <sup>-03</sup> | -0.021 (0.027)         | 4.3x10 <sup>-01</sup> | -0.047 (0.018)      | 7.3x10 <sup>-03</sup> |
| <i>FAM86C1</i>  | 11q13.4               | 27         | 0.21                 | 0.086 (0.039)               | 2.9x10 <sup>-02</sup> | 0.070 (0.045)          | 1.2x10 <sup>-01</sup> | 0.079 (0.030)       | 7.7x10 <sup>-03</sup> |
| <i>WRAP73</i>   | 1p36.32               | 12         | 0.18                 | -0.11 (0.052)               | 3.6x10 <sup>-02</sup> | -0.096 (0.059)         | 1.0x10 <sup>-01</sup> | -0.1 (0.039)        | 8.0x10 <sup>-03</sup> |
| <i>TTC18</i>    | 10q22.2               | 36         | 0.13                 | 0.058 (0.028)               | 3.7x10 <sup>-02</sup> | 0.10 (0.057)           | 7.4x10 <sup>-02</sup> | 0.066 (0.025)       | 8.0x10 <sup>-03</sup> |
| <i>CHMP7</i>    | 8p21.3                | 80         | 0.17                 | -0.09 (0.032)               | 4.4x10 <sup>-03</sup> | -0.022 (0.046)         | 6.3x10 <sup>-01</sup> | -0.068 (0.026)      | 8.8x10 <sup>-03</sup> |
| <i>OTUB1</i>    | 11q13.1               | 11         | 0.066                | -0.17 (0.057)               | 3.1x10 <sup>-03</sup> | -0.011 (0.098)         | 9.1x10 <sup>-01</sup> | -0.13 (0.050)       | 9.1x10 <sup>-03</sup> |
| <i>TRPC4AP</i>  | 20q11.22              | 31         | 0.04                 | 0.15 (0.049)                | 2.4x10 <sup>-03</sup> | 0.012 (0.070)          | 8.6x10 <sup>-01</sup> | 0.10 (0.040)        | 9.5x10 <sup>-03</sup> |
| <i>WBSCR27</i>  | 7q11.23               | 29         | 0.62                 | 0.055 (0.019)               | 3.1x10 <sup>-03</sup> | 0.0070 (0.027)         | 8.0x10 <sup>-01</sup> | 0.040 (0.015)       | 9.8x10 <sup>-03</sup> |
| <i>NELFE</i>    | 6p21.33               | 14         | 0.032                | -0.19 (0.077)               | 1.5x10 <sup>-02</sup> | -0.11 (0.11)           | 3.1x10 <sup>-01</sup> | -0.16 (0.064)       | 1.0x10 <sup>-02</sup> |
| <i>TMEM185B</i> | 2q14.2                | 23         | 0.097                | 0.12 (0.054)                | 2.8x10 <sup>-02</sup> | 0.091 (0.067)          | 1.7x10 <sup>-01</sup> | 0.11 (0.042)        | 1.0x10 <sup>-02</sup> |
| <i>POLDIP3</i>  | 22q13.2               | 3          | 0.032                | 3.2 (1.6)                   | 4.4x10 <sup>-02</sup> | 3.6 (2.3)              | 1.1x10 <sup>-01</sup> | 3.3 (1.3)           | 1.0x10 <sup>-02</sup> |
| <i>TECPR1</i>   | 7q21.3                | 1          | 0.02                 | -1.5 (0.55)                 | 5.6x10 <sup>-03</sup> | -0.4 (0.70)            | 5.6x10 <sup>-01</sup> | -1.1 (0.43)         | 1.1x10 <sup>-02</sup> |
| <i>KIFC2</i>    | 8q24.3                | 19         | 0.055                | 0.14 (0.062)                | 2.0x10 <sup>-02</sup> | 0.091 (0.078)          | 2.4x10 <sup>-01</sup> | 0.12 (0.048)        | 1.1x10 <sup>-02</sup> |
| <i>FOXN1</i>    | 17q11.2               | 4          | 0.033                | -0.29 (0.12)                | 2.1x10 <sup>-02</sup> | -0.16 (0.13)           | 2.3x10 <sup>-01</sup> | -0.22 (0.090)       | 1.2x10 <sup>-02</sup> |
| <i>LILRB3</i>   | 19q13.42              | 71         | 0.032                | -0.12 (0.040)               | 2.5x10 <sup>-03</sup> | -0.012 (0.047)         | 8.0x10 <sup>-01</sup> | -0.075 (0.030)      | 1.3x10 <sup>-02</sup> |
| <i>LY6G5C</i>   | 6p21.33               | 27         | 0.054                | -0.13 (0.060)               | 2.9x10 <sup>-02</sup> | -0.089 (0.069)         | 2.0x10 <sup>-01</sup> | -0.11 (0.046)       | 1.3x10 <sup>-02</sup> |
| <i>CBX8</i>     | 17q25.3               | 10         | 0.068                | 0.25 (0.082)                | 2.4x10 <sup>-03</sup> | 0.019 (0.098)          | 8.4x10 <sup>-01</sup> | 0.15 (0.063)        | 1.4x10 <sup>-02</sup> |
| <i>CCDC114</i>  | 19q13.33              | 14         | 0.096                | 0.24 (0.079)                | 2.5x10 <sup>-03</sup> | 0.019 (0.096)          | 8.4x10 <sup>-01</sup> | 0.15 (0.061)        | 1.4x10 <sup>-02</sup> |
| <i>GPR19</i>    | 12p13.1               | 19         | 0.054                | -0.16 (0.069)               | 2.0x10 <sup>-02</sup> | -0.093 (0.093)         | 3.2x10 <sup>-01</sup> | -0.14 (0.055)       | 1.4x10 <sup>-02</sup> |
| <i>STRA13</i>   | 17q25.3               | 10         | 0.25                 | -0.084 (0.040)              | 3.5x10 <sup>-02</sup> | -0.061 (0.047)         | 1.9x10 <sup>-01</sup> | -0.074 (0.030)      | 1.4x10 <sup>-02</sup> |
| <i>ITCH</i>     | 20q11.22              | 21         | 0.045                | 0.31 (0.086)                | 2.8x10 <sup>-04</sup> | -0.024 (0.090)         | 7.9x10 <sup>-01</sup> | 0.15 (0.062)        | 1.5x10 <sup>-02</sup> |
| <i>GLYATL2</i>  | 11q12.1               | 74         | 0.089                | 0.13 (0.040)                | 1.9x10 <sup>-03</sup> | -0.024 (0.064)         | 7.1x10 <sup>-01</sup> | 0.083 (0.034)       | 1.5x10 <sup>-02</sup> |

| Gene                 | Location <sup>a</sup> | # SNPs in  | Imputation           | Discovery U4C Meta-analysis |                       | UK Biobank Replication |                       | Joint Meta-analysis |                       |
|----------------------|-----------------------|------------|----------------------|-----------------------------|-----------------------|------------------------|-----------------------|---------------------|-----------------------|
|                      |                       | Prediction | Quality <sup>b</sup> | Beta (SE)                   | p-value               | Beta (SE)              | p-value               | Beta (SE)           | p-value               |
| <i>CCDC53</i>        | 12q23.2               | 13         | 0.098                | 0.14 (0.069)                | 4.0x10 <sup>-02</sup> | 0.14 (0.11)            | 1.9x10 <sup>-01</sup> | 0.14 (0.058)        | 1.5x10 <sup>-02</sup> |
| <i>FRG1B</i>         | 20q11.21              | 32         | 0.062                | -0.11 (0.042)               | 7.6x10 <sup>-03</sup> | -0.028 (0.049)         | 5.6x10 <sup>-01</sup> | -0.076 (0.032)      | 1.6x10 <sup>-02</sup> |
| <i>JAKMIP2</i>       | 5q32                  | 30         | 0.059                | 0.14 (0.055)                | 8.9x10 <sup>-03</sup> | 0.039 (0.071)          | 5.8x10 <sup>-01</sup> | 0.10 (0.043)        | 1.6x10 <sup>-02</sup> |
| <i>DNAH1</i>         | 3p21.1                | 58         | 0.045                | 0.072 (0.036)               | 4.7x10 <sup>-02</sup> | 0.064 (0.046)          | 1.7x10 <sup>-01</sup> | 0.069 (0.029)       | 1.6x10 <sup>-02</sup> |
| <i>IL1RN</i>         | 2q13                  | 15         | 0.068                | 0.16 (0.071)                | 2.9x10 <sup>-02</sup> | 0.10 (0.094)           | 2.8x10 <sup>-01</sup> | 0.14 (0.057)        | 1.7x10 <sup>-02</sup> |
| <i>GTF2H1</i>        | 11p15.1               | 12         | 0.17                 | -0.11 (0.056)               | 4.3x10 <sup>-02</sup> | -0.086 (0.065)         | 1.9x10 <sup>-01</sup> | -0.1 (0.043)        | 1.7x10 <sup>-02</sup> |
| <i>DCAF5</i>         | 14q24.1               | 31         | 0.034                | 0.13 (0.064)                | 4.9x10 <sup>-02</sup> | 0.12 (0.088)           | 1.9x10 <sup>-01</sup> | 0.12 (0.052)        | 1.8x10 <sup>-02</sup> |
| <i>STEAP3</i>        | 2q14.2                | 18         | 0.094                | 0.17 (0.060)                | 4.9x10 <sup>-03</sup> | 0.015 (0.077)          | 8.5x10 <sup>-01</sup> | 0.11 (0.047)        | 2.0x10 <sup>-02</sup> |
| <i>LRRK1</i>         | 15q26.3               | 30         | 0.034                | 0.15 (0.055)                | 5.6x10 <sup>-03</sup> | -0.043 (0.11)          | 7.0x10 <sup>-01</sup> | 0.11 (0.049)        | 2.0x10 <sup>-02</sup> |
| <i>AP3M2</i>         | 8p11.21               | 16         | 0.095                | -0.12 (0.053)               | 2.2x10 <sup>-02</sup> | -0.056 (0.067)         | 4.0x10 <sup>-01</sup> | -0.096 (0.041)      | 2.0x10 <sup>-02</sup> |
| <i>ZSCAN29</i>       | 15q15.3               | 33         | 0.24                 | 0.11 (0.049)                | 2.2x10 <sup>-02</sup> | 0.050 (0.050)          | 3.1x10 <sup>-01</sup> | 0.082 (0.035)       | 2.0x10 <sup>-02</sup> |
| <i>TACSTD2</i>       | 1p32.1                | 11         | 0.038                | 0.21 (0.10)                 | 4.1x10 <sup>-02</sup> | 0.15 (0.12)            | 2.3x10 <sup>-01</sup> | 0.18 (0.079)        | 2.0x10 <sup>-02</sup> |
| <i>PHOSPHO2</i>      | 2q31.1                | 10         | 0.14                 | -0.12 (0.059)               | 4.3x10 <sup>-02</sup> | -0.086 (0.072)         | 2.3x10 <sup>-01</sup> | -0.11 (0.046)       | 2.0x10 <sup>-02</sup> |
| <i>WIZ</i>           | 19p13.12              | 17         | 0.022                | 0.34 (0.10)                 | 7.9x10 <sup>-04</sup> | -0.05 (0.12)           | 6.8x10 <sup>-01</sup> | 0.18 (0.078)        | 2.1x10 <sup>-02</sup> |
| <i>PAN3</i>          | 13q12.2               | 27         | 0.023                | -0.21 (0.076)               | 5.7x10 <sup>-03</sup> | -0.012 (0.10)          | 9.1x10 <sup>-01</sup> | -0.14 (0.061)       | 2.1x10 <sup>-02</sup> |
| <i>CTD-2054N24.2</i> | 15q26.3               | 23         | 0.22                 | -0.094 (0.041)              | 2.1x10 <sup>-02</sup> | -0.041 (0.047)         | 3.9x10 <sup>-01</sup> | -0.071 (0.031)      | 2.1x10 <sup>-02</sup> |
| <i>BIRC5</i>         | 17q25.3               | 21         | 0.084                | 0.12 (0.055)                | 3.3x10 <sup>-02</sup> | 0.083 (0.085)          | 3.3x10 <sup>-01</sup> | 0.11 (0.046)        | 2.1x10 <sup>-02</sup> |
| <i>OXTR</i>          | 3p25.3                | 13         | 0.042                | 0.22 (0.11)                 | 4.2x10 <sup>-02</sup> | 0.13 (0.11)            | 2.2x10 <sup>-01</sup> | 0.17 (0.075)        | 2.1x10 <sup>-02</sup> |
| <i>CNOT6L</i>        | 4q21.1                | 67         | 0.11                 | -0.11 (0.042)               | 6.0x10 <sup>-03</sup> | -0.0093 (0.055)        | 8.7x10 <sup>-01</sup> | -0.076 (0.033)      | 2.2x10 <sup>-02</sup> |
| <i>LDB3</i>          | 10q23.2               | 20         | 0.18                 | 0.095 (0.036)               | 8.1x10 <sup>-03</sup> | 0.0059 (0.056)         | 9.2x10 <sup>-01</sup> | 0.069 (0.030)       | 2.2x10 <sup>-02</sup> |
| <i>CKAP5</i>         | 11p11.2               | 9          | 0.039                | 0.18 (0.085)                | 2.9x10 <sup>-02</sup> | 0.10 (0.12)            | 3.8x10 <sup>-01</sup> | 0.16 (0.069)        | 2.2x10 <sup>-02</sup> |
| <i>CUL9</i>          | 6p21.1                | 63         | 0.077                | 0.068 (0.035)               | 4.9x10 <sup>-02</sup> | 0.059 (0.050)          | 2.4x10 <sup>-01</sup> | 0.065 (0.028)       | 2.2x10 <sup>-02</sup> |
| <i>RIF1</i>          | 2q23.3                | 35         | 0.16                 | 0.11 (0.045)                | 1.3x10 <sup>-02</sup> | 0.029 (0.059)          | 6.3x10 <sup>-01</sup> | 0.081 (0.036)       | 2.3x10 <sup>-02</sup> |
| <i>OOEP</i>          | 6q13                  | 33         | 0.037                | -0.12 (0.059)               | 4.1x10 <sup>-02</sup> | -0.092 (0.087)         | 2.9x10 <sup>-01</sup> | -0.11 (0.049)       | 2.3x10 <sup>-02</sup> |
| <i>IL10RB</i>        | 21q22.11              | 9          | 0.085                | 0.18 (0.078)                | 1.9x10 <sup>-02</sup> | 0.065 (0.11)           | 5.4x10 <sup>-01</sup> | 0.14 (0.063)        | 2.4x10 <sup>-02</sup> |
| <i>CARHSP1</i>       | 16p13.2               | 35         | 0.077                | -0.11 (0.051)               | 2.7x10 <sup>-02</sup> | -0.056 (0.073)         | 4.4x10 <sup>-01</sup> | -0.094 (0.042)      | 2.4x10 <sup>-02</sup> |
| <i>ZNF112</i>        | 19q13.31              | 24         | 0.025                | -0.13 (0.062)               | 3.5x10 <sup>-02</sup> | -0.078 (0.085)         | 3.6x10 <sup>-01</sup> | -0.11 (0.050)       | 2.4x10 <sup>-02</sup> |

| Gene            | Location <sup>a</sup> | # SNPs in  | Imputation           | Discovery U4C Meta-analysis |                       | UK Biobank Replication |                       | Joint Meta-analysis |                       |
|-----------------|-----------------------|------------|----------------------|-----------------------------|-----------------------|------------------------|-----------------------|---------------------|-----------------------|
|                 |                       | Prediction | Quality <sup>b</sup> | Beta (SE)                   | p-value               | Beta (SE)              | p-value               | Beta (SE)           | p-value               |
| <i>TXNL4B</i>   | 16q22.2               | 18         | 0.033                | 0.11 (0.052)                | 3.6x10 <sup>-02</sup> | 0.11 (0.13)            | 4.0x10 <sup>-01</sup> | 0.11 (0.048)        | 2.4x10 <sup>-02</sup> |
| <i>MET</i>      | 7q31.2                | 81         | 0.071                | 0.072 (0.030)               | 1.8x10 <sup>-02</sup> | 0.022 (0.042)          | 6.0x10 <sup>-01</sup> | 0.055 (0.025)       | 2.5x10 <sup>-02</sup> |
| <i>ZNF544</i>   | 19q13.43              | 10         | 0.022                | -0.21 (0.11)                | 4.7x10 <sup>-02</sup> | -0.13 (0.11)           | 2.4x10 <sup>-01</sup> | -0.17 (0.077)       | 2.5x10 <sup>-02</sup> |
| <i>PCDHA10</i>  | 5q31.3                | 10         | 0.12                 | 0.12 (0.054)                | 2.8x10 <sup>-02</sup> | 0.052 (0.058)          | 3.7x10 <sup>-01</sup> | 0.088 (0.040)       | 2.6x10 <sup>-02</sup> |
| <i>TREM1</i>    | 6p21.1                | 26         | 0.025                | 0.17 (0.077)                | 3.2x10 <sup>-02</sup> | 0.091 (0.11)           | 4.2x10 <sup>-01</sup> | 0.14 (0.064)        | 2.6x10 <sup>-02</sup> |
| <i>CCNF</i>     | 16p13.3               | 15         | 0.022                | 0.21 (0.11)                 | 4.8x10 <sup>-02</sup> | 0.14 (0.13)            | 2.7x10 <sup>-01</sup> | 0.18 (0.083)        | 2.6x10 <sup>-02</sup> |
| <i>PRR12</i>    | 19q13.33              | 6          | 0.12                 | 0.19 (0.073)                | 9.8x10 <sup>-03</sup> | 0.029 (0.090)          | 7.4x10 <sup>-01</sup> | 0.13 (0.057)        | 2.7x10 <sup>-02</sup> |
| <i>ZNF606</i>   | 19q13.43              | 2          | 0.027                | 1.1 (0.57)                  | 4.3x10 <sup>-02</sup> | 1.1 (1.2)              | 3.6x10 <sup>-01</sup> | 1.1 (0.51)          | 2.7x10 <sup>-02</sup> |
| <i>Z98049.1</i> | 6q27                  | 2          | 0.034                | 0.32 (0.14)                 | 2.2x10 <sup>-02</sup> | 0.11 (0.20)            | 5.6x10 <sup>-01</sup> | 0.25 (0.11)         | 2.8x10 <sup>-02</sup> |
| <i>GABRB3</i>   | 15q12                 | 12         | 0.19                 | -0.11 (0.051)               | 3.7x10 <sup>-02</sup> | -0.058 (0.063)         | 3.6x10 <sup>-01</sup> | -0.087 (0.040)      | 2.8x10 <sup>-02</sup> |
| <i>MPP4</i>     | 2q33.1                | 44         | 0.03                 | -0.13 (0.047)               | 6.5x10 <sup>-03</sup> | -0.0077 (0.057)        | 8.9x10 <sup>-01</sup> | -0.079 (0.036)      | 2.9x10 <sup>-02</sup> |
| <i>MYO15B</i>   | 17q25.1               | 22         | 0.11                 | 0.14 (0.054)                | 1.0x10 <sup>-02</sup> | 0.018 (0.070)          | 8.0x10 <sup>-01</sup> | 0.094 (0.043)       | 2.9x10 <sup>-02</sup> |
| <i>TTL</i>      | 2q13                  | 62         | 0.037                | -0.097 (0.049)              | 4.8x10 <sup>-02</sup> | -0.066 (0.066)         | 3.2x10 <sup>-01</sup> | -0.086 (0.039)      | 2.9x10 <sup>-02</sup> |
| <i>RNMT</i>     | 18p11.21              | 25         | 0.028                | 0.16 (0.077)                | 3.9x10 <sup>-02</sup> | 0.096 (0.12)           | 4.0x10 <sup>-01</sup> | 0.14 (0.064)        | 3.0x10 <sup>-02</sup> |
| <i>GLRB</i>     | 4q32.1                | 23         | 0.031                | -0.14 (0.067)               | 4.2x10 <sup>-02</sup> | -0.085 (0.099)         | 3.9x10 <sup>-01</sup> | -0.12 (0.056)       | 3.0x10 <sup>-02</sup> |
| <i>CYP27C1</i>  | 2q14.3                | 13         | 0.089                | -0.15 (0.067)               | 2.7x10 <sup>-02</sup> | -0.057 (0.095)         | 5.5x10 <sup>-01</sup> | -0.12 (0.055)       | 3.1x10 <sup>-02</sup> |
| <i>GAPT</i>     | 5q11.2                | 31         | 0.026                | -0.16 (0.078)               | 4.3x10 <sup>-02</sup> | -0.091 (0.10)          | 3.7x10 <sup>-01</sup> | -0.13 (0.062)       | 3.1x10 <sup>-02</sup> |
| <i>STXBP4</i>   | 17q22                 | 43         | 0.091                | 0.14 (0.050)                | 4.6x10 <sup>-03</sup> | -0.0047 (0.061)        | 9.4x10 <sup>-01</sup> | 0.083 (0.038)       | 3.2x10 <sup>-02</sup> |
| <i>ALS2CR12</i> | 2q33.1                | 30         | 0.067                | 0.14 (0.065)                | 3.7x10 <sup>-02</sup> | 0.069 (0.085)          | 4.2x10 <sup>-01</sup> | 0.11 (0.052)        | 3.2x10 <sup>-02</sup> |
| <i>DNAH6</i>    | 2p11.2                | 7          | 0.23                 | -0.16 (0.054)               | 2.6x10 <sup>-03</sup> | 0.0073 (0.058)         | 9.0x10 <sup>-01</sup> | -0.084 (0.039)      | 3.3x10 <sup>-02</sup> |
| <i>IFT46</i>    | 11q23.3               | 22         | 0.25                 | -0.086 (0.034)              | 1.1x10 <sup>-02</sup> | 0.0048 (0.056)         | 9.3x10 <sup>-01</sup> | -0.062 (0.029)      | 3.3x10 <sup>-02</sup> |
| <i>MIS18BP1</i> | 14q21.2               | 23         | 0.086                | 0.086 (0.041)               | 3.6x10 <sup>-02</sup> | 0.046 (0.074)          | 5.3x10 <sup>-01</sup> | 0.077 (0.036)       | 3.3x10 <sup>-02</sup> |
| <i>CXCL9</i>    | 4q21.1                | 3          | 0.027                | -1.3 (0.66)                 | 4.6x10 <sup>-02</sup> | -0.86 (1.1)            | 4.2x10 <sup>-01</sup> | -1.2 (0.56)         | 3.4x10 <sup>-02</sup> |
| <i>ATF3</i>     | 1q32.3                | 26         | 0.033                | -0.24 (0.095)               | 1.3x10 <sup>-02</sup> | -0.043 (0.10)          | 6.8x10 <sup>-01</sup> | -0.15 (0.070)       | 3.5x10 <sup>-02</sup> |
| <i>NT5C3B</i>   | 17q21.2               | 20         | 0.58                 | 0.047 (0.021)               | 2.5x10 <sup>-02</sup> | 0.015 (0.026)          | 5.7x10 <sup>-01</sup> | 0.034 (0.016)       | 3.6x10 <sup>-02</sup> |
| <i>CYP2J2</i>   | 1p32.1                | 14         | 0.097                | -0.19 (0.086)               | 2.8x10 <sup>-02</sup> | -0.065 (0.090)         | 4.7x10 <sup>-01</sup> | -0.13 (0.062)       | 3.6x10 <sup>-02</sup> |
| <i>MCHR1</i>    | 22q13.2               | 15         | 0.048                | -0.13 (0.066)               | 4.8x10 <sup>-02</sup> | -0.078 (0.094)         | 4.1x10 <sup>-01</sup> | -0.11 (0.054)       | 3.6x10 <sup>-02</sup> |

| Gene              | Location <sup>a</sup> | # SNPs in Prediction | Imputation Quality <sup>b</sup> | Discovery U4C Meta-analysis |                       | UK Biobank Replication |                       | Joint Meta-analysis |                       |
|-------------------|-----------------------|----------------------|---------------------------------|-----------------------------|-----------------------|------------------------|-----------------------|---------------------|-----------------------|
|                   |                       |                      |                                 | Beta (SE)                   | p-value               | Beta (SE)              | p-value               | Beta (SE)           | p-value               |
| <i>RPS10</i>      | 6p21.31               | 8                    | 0.057                           | 0.14 (0.061)                | 2.1x10 <sup>-02</sup> | 0.012 (0.11)           | 9.2x10 <sup>-01</sup> | 0.11 (0.054)        | 3.7x10 <sup>-02</sup> |
| <i>ZNF500</i>     | 16p13.3               | 65                   | 0.28                            | -0.062 (0.027)              | 2.4x10 <sup>-02</sup> | -0.017 (0.035)         | 6.3x10 <sup>-01</sup> | -0.045 (0.022)      | 3.8x10 <sup>-02</sup> |
| <i>KIAA1279</i>   | 10q22.1               | 12                   | 0.039                           | -0.31 (0.11)                | 4.4x10 <sup>-03</sup> | 0.0073 (0.12)          | 9.5x10 <sup>-01</sup> | -0.17 (0.081)       | 3.9x10 <sup>-02</sup> |
| <i>MVB12B</i>     | 9q33.3                | 16                   | 0.022                           | -0.16 (0.082)               | 4.4x10 <sup>-02</sup> | -0.08 (0.10)           | 4.3x10 <sup>-01</sup> | -0.13 (0.064)       | 3.9x10 <sup>-02</sup> |
| <i>XRN2</i>       | 20p11.23              | 90                   | 0.071                           | 0.069 (0.029)               | 1.7x10 <sup>-02</sup> | 0.0073 (0.041)         | 8.6x10 <sup>-01</sup> | 0.049 (0.024)       | 4.0x10 <sup>-02</sup> |
| <i>LRRC27</i>     | 10q26.3               | 8                    | 0.12                            | 0.11 (0.049)                | 2.8x10 <sup>-02</sup> | 0.028 (0.079)          | 7.2x10 <sup>-01</sup> | 0.086 (0.042)       | 4.0x10 <sup>-02</sup> |
| <i>SLC5A11</i>    | 16p12.1               | 35                   | 0.44                            | -0.056 (0.026)              | 3.1x10 <sup>-02</sup> | -0.019 (0.030)         | 5.2x10 <sup>-01</sup> | -0.04 (0.020)       | 4.0x10 <sup>-02</sup> |
| <i>NDUFA10</i>    | 2q37.3                | 61                   | 0.44                            | 0.050 (0.024)               | 3.4x10 <sup>-02</sup> | 0.019 (0.027)          | 4.9x10 <sup>-01</sup> | 0.037 (0.018)       | 4.0x10 <sup>-02</sup> |
| <i>IGSF6</i>      | 16p12.2               | 22                   | 0.073                           | -0.14 (0.065)               | 3.4x10 <sup>-02</sup> | -0.049 (0.11)          | 6.5x10 <sup>-01</sup> | -0.11 (0.055)       | 4.1x10 <sup>-02</sup> |
| <i>FLCN</i>       | 17p11.2               | 34                   | 0.54                            | 0.043 (0.021)               | 4.1x10 <sup>-02</sup> | 0.019 (0.028)          | 5.0x10 <sup>-01</sup> | 0.035 (0.017)       | 4.1x10 <sup>-02</sup> |
| <i>CHRM1</i>      | 11q12.3               | 27                   | 0.039                           | -0.12 (0.053)               | 2.9x10 <sup>-02</sup> | -0.032 (0.077)         | 6.8x10 <sup>-01</sup> | -0.089 (0.044)      | 4.2x10 <sup>-02</sup> |
| <i>ZBTB12</i>     | 6p21.33               | 8                    | 0.027                           | -0.28 (0.093)               | 2.7x10 <sup>-03</sup> | 0.29 (0.19)            | 1.3x10 <sup>-01</sup> | -0.17 (0.084)       | 4.4x10 <sup>-02</sup> |
| <i>C2CD4C</i>     | 19p13.3               | 11                   | 0.15                            | 0.16 (0.063)                | 1.1x10 <sup>-02</sup> | 0.012 (0.070)          | 8.6x10 <sup>-01</sup> | 0.094 (0.047)       | 4.4x10 <sup>-02</sup> |
| <i>CABLES2</i>    | 20q13.33              | 13                   | 0.1                             | -0.18 (0.075)               | 1.6x10 <sup>-02</sup> | -0.032 (0.077)         | 6.8x10 <sup>-01</sup> | -0.11 (0.054)       | 4.4x10 <sup>-02</sup> |
| <i>AP000769.1</i> | 11q13.1               | 9                    | 0.035                           | 0.22 (0.097)                | 2.2x10 <sup>-02</sup> | 0.035 (0.14)           | 8.0x10 <sup>-01</sup> | 0.16 (0.079)        | 4.4x10 <sup>-02</sup> |
| <i>CCL23</i>      | 17q12                 | 17                   | 0.26                            | -0.066 (0.032)              | 3.9x10 <sup>-02</sup> | -0.024 (0.046)         | 5.9x10 <sup>-01</sup> | -0.052 (0.026)      | 4.6x10 <sup>-02</sup> |
| <i>MAPK8IP2</i>   | 22q13.33              | 13                   | 0.076                           | 0.19 (0.069)                | 6.7x10 <sup>-03</sup> | -0.011 (0.082)         | 9.0x10 <sup>-01</sup> | 0.10 (0.053)        | 4.7x10 <sup>-02</sup> |
| <i>ABCA5</i>      | 17q24.3               | 2                    | 0.033                           | 3.3 (1.4)                   | 2.0x10 <sup>-02</sup> | 0.46 (1.8)             | 8.0x10 <sup>-01</sup> | 2.2 (1.1)           | 4.8x10 <sup>-02</sup> |
| <i>GABRP</i>      | 5q35.1                | 9                    | 0.029                           | 0.28 (0.12)                 | 2.5x10 <sup>-02</sup> | 0.050 (0.17)           | 7.7x10 <sup>-01</sup> | 0.20 (0.10)         | 4.8x10 <sup>-02</sup> |
| <i>GLTP</i>       | 12q24.11              | 10                   | 0.093                           | -0.16 (0.064)               | 1.0x10 <sup>-02</sup> | 0.0034 (0.078)         | 9.7x10 <sup>-01</sup> | -0.097 (0.049)      | 4.9x10 <sup>-02</sup> |
| <i>CRHR2</i>      | 7p14.3                | 25                   | 0.42                            | -0.062 (0.029)              | 3.4x10 <sup>-02</sup> | -0.019 (0.037)         | 6.1x10 <sup>-01</sup> | -0.045 (0.023)      | 4.9x10 <sup>-02</sup> |
| <i>TCTN2</i>      | 12q24.31              | 36                   | 0.26                            | -0.069 (0.033)              | 3.7x10 <sup>-02</sup> | -0.021 (0.048)         | 6.6x10 <sup>-01</sup> | -0.054 (0.027)      | 5.0x10 <sup>-02</sup> |
| <i>CYP4A22</i>    | 1p33                  | 18                   | 0.019                           | -0.21 (0.076)               | 4.5x10 <sup>-03</sup> | 0.064 (0.10)           | 5.5x10 <sup>-01</sup> | -0.12 (0.061)       | 5.1x10 <sup>-02</sup> |
| <i>JMJD1C</i>     | 10q21.3               | 1                    | 0.041                           | 5.1 (2.4)                   | 3.3x10 <sup>-02</sup> | 1.5 (2.2)              | 4.9x10 <sup>-01</sup> | 3.2 (1.6)           | 5.1x10 <sup>-02</sup> |
| <i>AAAS</i>       | 12q13.13              | 36                   | 0.043                           | 0.10 (0.052)                | 4.3x10 <sup>-02</sup> | 0.022 (0.14)           | 8.7x10 <sup>-01</sup> | 0.094 (0.048)       | 5.1x10 <sup>-02</sup> |
| <i>RHNO1</i>      | 12p13.33              | 13                   | 0.052                           | -0.18 (0.088)               | 3.8x10 <sup>-02</sup> | -0.054 (0.12)          | 6.6x10 <sup>-01</sup> | -0.14 (0.071)       | 5.2x10 <sup>-02</sup> |
| <i>WDR81</i>      | 17p13.3               | 11                   | 0.034                           | -0.32 (0.10)                | 1.3x10 <sup>-03</sup> | 0.14 (0.13)            | 2.9x10 <sup>-01</sup> | -0.16 (0.081)       | 5.3x10 <sup>-02</sup> |

| Gene              | Location <sup>a</sup> | # SNPs in  | Imputation           | Discovery U4C Meta-analysis |                       | UK Biobank Replication |                       | Joint Meta-analysis |                       |
|-------------------|-----------------------|------------|----------------------|-----------------------------|-----------------------|------------------------|-----------------------|---------------------|-----------------------|
|                   |                       | Prediction | Quality <sup>b</sup> | Beta (SE)                   | p-value               | Beta (SE)              | p-value               | Beta (SE)           | p-value               |
| <i>TAS2R43</i>    | 12p13.2               | 21         | 0.29                 | -0.085 (0.036)              | 1.7x10 <sup>-02</sup> | -0.0066 (0.043)        | 8.8x10 <sup>-01</sup> | -0.053 (0.027)      | 5.3x10 <sup>-02</sup> |
| <i>SH3BGR</i>     | 21q22.2               | 12         | 0.078                | -0.18 (0.090)               | 4.3x10 <sup>-02</sup> | -0.065 (0.098)         | 5.1x10 <sup>-01</sup> | -0.13 (0.066)       | 5.3x10 <sup>-02</sup> |
| <i>NOMO3</i>      | 16p13.11              | 36         | 0.17                 | -0.098 (0.048)              | 4.2x10 <sup>-02</sup> | -0.033 (0.053)         | 5.3x10 <sup>-01</sup> | -0.069 (0.036)      | 5.4x10 <sup>-02</sup> |
| <i>KIF11</i>      | 10q23.33              | 1          | 0.055                | 4.9 (2.2)                   | 2.5x10 <sup>-02</sup> | 1.00 (2.3)             | 6.6x10 <sup>-01</sup> | 3.0 (1.6)           | 5.5x10 <sup>-02</sup> |
| <i>PLCG2</i>      | 16q23.3               | 18         | 0.044                | 0.17 (0.077)                | 3.1x10 <sup>-02</sup> | 0.034 (0.098)          | 7.3x10 <sup>-01</sup> | 0.12 (0.060)        | 5.6x10 <sup>-02</sup> |
| <i>NDUFB1</i>     | 14q32.12              | 16         | 0.041                | -0.22 (0.092)               | 1.5x10 <sup>-02</sup> | 0.0044 (0.12)          | 9.7x10 <sup>-01</sup> | -0.14 (0.072)       | 5.7x10 <sup>-02</sup> |
| <i>MDGA1</i>      | 6p21.2                | 65         | 0.3                  | -0.063 (0.029)              | 3.0x10 <sup>-02</sup> | -0.012 (0.037)         | 7.5x10 <sup>-01</sup> | -0.044 (0.023)      | 5.7x10 <sup>-02</sup> |
| <i>MAGEF1</i>     | 3q27.1                | 38         | 0.088                | 0.093 (0.045)               | 3.6x10 <sup>-02</sup> | 0.022 (0.061)          | 7.2x10 <sup>-01</sup> | 0.068 (0.036)       | 5.7x10 <sup>-02</sup> |
| <i>ADRB1</i>      | 10q25.3               | 17         | 0.021                | -0.16 (0.078)               | 3.8x10 <sup>-02</sup> | -0.035 (0.12)          | 7.7x10 <sup>-01</sup> | -0.12 (0.065)       | 5.9x10 <sup>-02</sup> |
| <i>WDR25</i>      | 14q32.2               | 15         | 0.047                | -0.13 (0.063)               | 3.9x10 <sup>-02</sup> | -0.035 (0.080)         | 6.6x10 <sup>-01</sup> | -0.094 (0.050)      | 5.9x10 <sup>-02</sup> |
| <i>RPA1</i>       | 17p13.3               | 95         | 0.098                | -0.056 (0.027)              | 3.8x10 <sup>-02</sup> | -0.013 (0.037)         | 7.3x10 <sup>-01</sup> | -0.041 (0.022)      | 6.0x10 <sup>-02</sup> |
| <i>HLA-DOB</i>    | 6p21.32               | 43         | 0.48                 | -0.051 (0.024)              | 3.4x10 <sup>-02</sup> | -0.01 (0.030)          | 7.3x10 <sup>-01</sup> | -0.035 (0.019)      | 6.1x10 <sup>-02</sup> |
| <i>DHX16</i>      | 6p21.33               | 17         | 0.025                | -0.13 (0.066)               | 4.3x10 <sup>-02</sup> | -0.037 (0.087)         | 6.7x10 <sup>-01</sup> | -0.098 (0.052)      | 6.1x10 <sup>-02</sup> |
| <i>MYLK4</i>      | 6p25.2                | 31         | 0.26                 | 0.095 (0.038)               | 1.3x10 <sup>-02</sup> | -0.0033 (0.047)        | 9.4x10 <sup>-01</sup> | 0.055 (0.030)       | 6.2x10 <sup>-02</sup> |
| <i>MSMO1</i>      | 4q32.3                | 8          | 0.045                | 0.20 (0.090)                | 2.2x10 <sup>-02</sup> | 0.013 (0.11)           | 9.1x10 <sup>-01</sup> | 0.13 (0.071)        | 6.2x10 <sup>-02</sup> |
| <i>PSMG1</i>      | 21q22.2               | 26         | 0.36                 | 0.077 (0.036)               | 3.2x10 <sup>-02</sup> | 0.016 (0.041)          | 7.0x10 <sup>-01</sup> | 0.050 (0.027)       | 6.3x10 <sup>-02</sup> |
| <i>STRADA</i>     | 17q23.3               | 47         | 0.052                | 0.13 (0.051)                | 8.9x10 <sup>-03</sup> | -0.011 (0.058)         | 8.5x10 <sup>-01</sup> | 0.070 (0.038)       | 6.5x10 <sup>-02</sup> |
| <i>PTER</i>       | 10p13                 | 81         | 0.085                | 0.069 (0.032)               | 3.1x10 <sup>-02</sup> | 0.0073 (0.044)         | 8.7x10 <sup>-01</sup> | 0.048 (0.026)       | 6.5x10 <sup>-02</sup> |
| <i>AC022498.1</i> | 3q27.3                | 10         | 0.044                | -0.15 (0.074)               | 3.9x10 <sup>-02</sup> | -0.03 (0.10)           | 7.8x10 <sup>-01</sup> | -0.11 (0.061)       | 6.5x10 <sup>-02</sup> |
| <i>SYNGR3</i>     | 16p13.3               | 47         | 0.027                | 0.13 (0.049)                | 8.2x10 <sup>-03</sup> | -0.032 (0.066)         | 6.3x10 <sup>-01</sup> | 0.072 (0.039)       | 6.6x10 <sup>-02</sup> |
| <i>LSR</i>        | 19q13.12              | 21         | 0.21                 | 0.12 (0.049)                | 1.1x10 <sup>-02</sup> | 0.0027 (0.049)         | 9.6x10 <sup>-01</sup> | 0.063 (0.035)       | 6.6x10 <sup>-02</sup> |
| <i>SNTA1</i>      | 20q11.21              | 23         | 0.026                | 0.22 (0.076)                | 4.5x10 <sup>-03</sup> | -0.043 (0.087)         | 6.2x10 <sup>-01</sup> | 0.10 (0.057)        | 6.8x10 <sup>-02</sup> |
| <i>IPO8</i>       | 12p11.21              | 13         | 0.1                  | -0.22 (0.081)               | 7.0x10 <sup>-03</sup> | 0.034 (0.096)          | 7.2x10 <sup>-01</sup> | -0.11 (0.062)       | 6.8x10 <sup>-02</sup> |
| <i>UROD</i>       | 1p34.1                | 25         | 0.14                 | -0.11 (0.049)               | 2.0x10 <sup>-02</sup> | -0.0011 (0.060)        | 9.9x10 <sup>-01</sup> | -0.069 (0.038)      | 6.8x10 <sup>-02</sup> |
| <i>SULT2B1</i>    | 19q13.33              | 35         | 0.036                | 0.13 (0.060)                | 3.3x10 <sup>-02</sup> | 0.018 (0.078)          | 8.1x10 <sup>-01</sup> | 0.087 (0.048)       | 6.8x10 <sup>-02</sup> |
| <i>FKBP7</i>      | 2q31.2                | 6          | 0.064                | 0.23 (0.079)                | 3.8x10 <sup>-03</sup> | -0.12 (0.12)           | 3.1x10 <sup>-01</sup> | 0.12 (0.065)        | 6.9x10 <sup>-02</sup> |
| <i>EBNA1BP2</i>   | 1p34.2                | 22         | 0.019                | -0.2 (0.081)                | 1.1x10 <sup>-02</sup> | 0.041 (0.11)           | 7.0x10 <sup>-01</sup> | -0.12 (0.065)       | 7.1x10 <sup>-02</sup> |

| Gene            | Location <sup>a</sup> | # SNPs in  | Imputation           | Discovery U4C Meta-analysis |                       | UK Biobank Replication |                       | Joint Meta-analysis |                       |
|-----------------|-----------------------|------------|----------------------|-----------------------------|-----------------------|------------------------|-----------------------|---------------------|-----------------------|
|                 |                       | Prediction | Quality <sup>b</sup> | Beta (SE)                   | p-value               | Beta (SE)              | p-value               | Beta (SE)           | p-value               |
| <i>SETD9</i>    | 5q11.2                | 21         | 0.27                 | 0.073 (0.030)               | 1.7x10 <sup>-02</sup> | -0.015 (0.046)         | 7.4x10 <sup>-01</sup> | 0.046 (0.025)       | 7.1x10 <sup>-02</sup> |
| <i>EVI5</i>     | 1p22.1                | 24         | 0.073                | -0.24 (0.10)                | 1.9x10 <sup>-02</sup> | -0.025 (0.096)         | 8.0x10 <sup>-01</sup> | -0.13 (0.070)       | 7.1x10 <sup>-02</sup> |
| <i>TCP11</i>    | 6p21.31               | 8          | 0.042                | 0.24 (0.091)                | 9.4x10 <sup>-03</sup> | -0.038 (0.11)          | 7.3x10 <sup>-01</sup> | 0.13 (0.070)        | 7.2x10 <sup>-02</sup> |
| <i>WDR20</i>    | 14q32.31              | 53         | 0.028                | -0.094 (0.040)              | 1.8x10 <sup>-02</sup> | 0.016 (0.058)          | 7.8x10 <sup>-01</sup> | -0.059 (0.033)      | 7.3x10 <sup>-02</sup> |
| <i>ABHD8</i>    | 19p13.11              | 11         | 0.092                | 0.17 (0.079)                | 3.3x10 <sup>-02</sup> | 0.027 (0.090)          | 7.6x10 <sup>-01</sup> | 0.11 (0.059)        | 7.3x10 <sup>-02</sup> |
| <i>CBX1</i>     | 17q21.32              | 17         | 0.019                | -0.15 (0.076)               | 4.4x10 <sup>-02</sup> | -0.03 (0.10)           | 7.6x10 <sup>-01</sup> | -0.11 (0.060)       | 7.3x10 <sup>-02</sup> |
| <i>SLC25A44</i> | 1q22                  | 24         | 0.12                 | -0.19 (0.076)               | 1.5x10 <sup>-02</sup> | -0.00025 (0.082)       | 1.00E+00              | -0.1 (0.056)        | 7.5x10 <sup>-02</sup> |
| <i>TRAIP</i>    | 3p21.31               | 2          | 0.037                | -2.3 (0.97)                 | 1.7x10 <sup>-02</sup> | -0.25 (0.85)           | 7.7x10 <sup>-01</sup> | -1.1 (0.64)         | 7.5x10 <sup>-02</sup> |
| <i>TXNL4A</i>   | 18q23                 | 11         | 0.067                | 0.17 (0.081)                | 4.1x10 <sup>-02</sup> | 0.022 (0.11)           | 8.5x10 <sup>-01</sup> | 0.12 (0.066)        | 7.5x10 <sup>-02</sup> |
| <i>MS4A14</i>   | 11q12.2               | 12         | 0.28                 | 0.088 (0.036)               | 1.5x10 <sup>-02</sup> | -0.01 (0.046)          | 8.2x10 <sup>-01</sup> | 0.051 (0.029)       | 7.6x10 <sup>-02</sup> |
| <i>NNAT</i>     | 20q11.23              | 24         | 0.048                | -0.14 (0.058)               | 2.0x10 <sup>-02</sup> | 0.031 (0.090)          | 7.3x10 <sup>-01</sup> | -0.087 (0.049)      | 7.6x10 <sup>-02</sup> |
| <i>WDR11</i>    | 10q26.12              | 25         | 0.45                 | 0.047 (0.023)               | 4.1x10 <sup>-02</sup> | 0.0060 (0.032)         | 8.5x10 <sup>-01</sup> | 0.033 (0.019)       | 7.6x10 <sup>-02</sup> |
| <i>IMPDH1</i>   | 7q32.1                | 9          | 0.086                | 0.15 (0.063)                | 1.6x10 <sup>-02</sup> | -0.026 (0.085)         | 7.6x10 <sup>-01</sup> | 0.088 (0.051)       | 8.0x10 <sup>-02</sup> |
| <i>ANKS6</i>    | 9q22.33               | 12         | 0.024                | -0.21 (0.10)                | 4.2x10 <sup>-02</sup> | -0.016 (0.16)          | 9.2x10 <sup>-01</sup> | -0.15 (0.086)       | 8.0x10 <sup>-02</sup> |
| <i>TAS2R10</i>  | 12p13.2               | 9          | 0.021                | 0.31 (0.12)                 | 1.2x10 <sup>-02</sup> | -0.017 (0.13)          | 8.9x10 <sup>-01</sup> | 0.15 (0.089)        | 8.1x10 <sup>-02</sup> |
| <i>DHRS3</i>    | 1p36.22               | 36         | 0.054                | 0.16 (0.069)                | 1.9x10 <sup>-02</sup> | 0.0025 (0.074)         | 9.7x10 <sup>-01</sup> | 0.088 (0.050)       | 8.1x10 <sup>-02</sup> |
| <i>SLFN12L</i>  | 17q12                 | 6          | 0.03                 | -0.21 (0.11)                | 4.2x10 <sup>-02</sup> | -0.034 (0.13)          | 7.9x10 <sup>-01</sup> | -0.14 (0.081)       | 8.3x10 <sup>-02</sup> |
| <i>ZNF350</i>   | 19q13.41              | 33         | 0.042                | -0.1 (0.052)                | 4.7x10 <sup>-02</sup> | -0.017 (0.070)         | 8.1x10 <sup>-01</sup> | -0.072 (0.042)      | 8.3x10 <sup>-02</sup> |
| <i>C17orf62</i> | 17q25.3               | 2          | 0.067                | -0.16 (0.081)               | 4.4x10 <sup>-02</sup> | -0.0035 (0.13)         | 9.8x10 <sup>-01</sup> | -0.12 (0.069)       | 8.4x10 <sup>-02</sup> |
| <i>MARVELD1</i> | 10q24.2               | 27         | 0.029                | -0.17 (0.082)               | 3.9x10 <sup>-02</sup> | -0.01 (0.11)           | 9.2x10 <sup>-01</sup> | -0.11 (0.066)       | 8.8x10 <sup>-02</sup> |
| <i>MMP16</i>    | 8q21.3                | 24         | 0.02                 | 0.16 (0.064)                | 1.4x10 <sup>-02</sup> | -0.041 (0.086)         | 6.3x10 <sup>-01</sup> | 0.087 (0.051)       | 9.1x10 <sup>-02</sup> |
| <i>GPATCH4</i>  | 1q23.1                | 3          | 0.019                | 0.69 (0.34)                 | 4.7x10 <sup>-02</sup> | 0.063 (0.46)           | 8.9x10 <sup>-01</sup> | 0.46 (0.28)         | 9.4x10 <sup>-02</sup> |
| <i>ABHD11</i>   | 7q11.23               | 17         | 0.026                | -0.19 (0.093)               | 4.1x10 <sup>-02</sup> | -0.017 (0.11)          | 8.8x10 <sup>-01</sup> | -0.12 (0.071)       | 9.6x10 <sup>-02</sup> |
| <i>RPL9</i>     | 4p14                  | 6          | 0.68                 | -0.043 (0.021)              | 4.0x10 <sup>-02</sup> | 0.020 (0.042)          | 6.3x10 <sup>-01</sup> | -0.03 (0.019)       | 1.0x10 <sup>-01</sup> |
| <i>MTMR4</i>    | 17q22                 | 4          | 0.034                | -0.22 (0.11)                | 4.2x10 <sup>-02</sup> | -0.017 (0.13)          | 8.9x10 <sup>-01</sup> | -0.13 (0.081)       | 1.0x10 <sup>-01</sup> |
| <i>C1orf229</i> | 1q44                  | 11         | 0.028                | 0.18 (0.083)                | 2.8x10 <sup>-02</sup> | -0.027 (0.11)          | 8.0x10 <sup>-01</sup> | 0.10 (0.066)        | 1.1x10 <sup>-01</sup> |
| <i>ACTR3C</i>   | 7q36.1                | 12         | 0.054                | 0.16 (0.076)                | 3.4x10 <sup>-02</sup> | -0.031 (0.11)          | 7.8x10 <sup>-01</sup> | 0.10 (0.063)        | 1.1x10 <sup>-01</sup> |

| Gene            | Location <sup>a</sup> | # SNPs in  | Imputation           | Discovery U4C Meta-analysis |                       | UK Biobank Replication |                       | Joint Meta-analysis |                       |
|-----------------|-----------------------|------------|----------------------|-----------------------------|-----------------------|------------------------|-----------------------|---------------------|-----------------------|
|                 |                       | Prediction | Quality <sup>b</sup> | Beta (SE)                   | p-value               | Beta (SE)              | p-value               | Beta (SE)           | p-value               |
| <i>HP1BP3</i>   | 1p36.12               | 33         | 0.02                 | 0.17 (0.072)                | 1.8x10 <sup>-02</sup> | -0.044 (0.091)         | 6.3x10 <sup>-01</sup> | 0.088 (0.056)       | 1.2x10 <sup>-01</sup> |
| <i>RPS8</i>     | 1p34.1                | 13         | 0.061                | -0.16 (0.072)               | 2.3x10 <sup>-02</sup> | 0.045 (0.099)          | 6.5x10 <sup>-01</sup> | -0.092 (0.058)      | 1.2x10 <sup>-01</sup> |
| <i>COMMD7</i>   | 20q11.21              | 23         | 0.036                | 0.17 (0.077)                | 2.4x10 <sup>-02</sup> | -0.0066 (0.080)        | 9.3x10 <sup>-01</sup> | 0.087 (0.056)       | 1.2x10 <sup>-01</sup> |
| <i>PPOX</i>     | 1q23.3                | 112        | 0.094                | -0.057 (0.025)              | 2.5x10 <sup>-02</sup> | 0.018 (0.036)          | 6.2x10 <sup>-01</sup> | -0.032 (0.021)      | 1.2x10 <sup>-01</sup> |
| <i>RPN1</i>     | 3q21.3                | 24         | 0.044                | -0.13 (0.058)               | 2.6x10 <sup>-02</sup> | 0.023 (0.074)          | 7.6x10 <sup>-01</sup> | -0.071 (0.045)      | 1.2x10 <sup>-01</sup> |
| <i>EPB41L4A</i> | 5q22.2                | 20         | 0.12                 | -0.17 (0.076)               | 2.6x10 <sup>-02</sup> | 0.0013 (0.075)         | 9.9x10 <sup>-01</sup> | -0.083 (0.053)      | 1.2x10 <sup>-01</sup> |
| <i>TAP1</i>     | 6p21.32               | 9          | 0.021                | 0.24 (0.10)                 | 2.0x10 <sup>-02</sup> | -0.13 (0.16)           | 4.1x10 <sup>-01</sup> | 0.13 (0.087)        | 1.3x10 <sup>-01</sup> |
| <i>TMEM201</i>  | 1p36.22               | 27         | 0.087                | -0.091 (0.041)              | 2.7x10 <sup>-02</sup> | 0.038 (0.061)          | 5.4x10 <sup>-01</sup> | -0.051 (0.034)      | 1.3x10 <sup>-01</sup> |
| <i>AGAP8</i>    | 10q11.23              | 29         | 0.54                 | 0.051 (0.025)               | 4.1x10 <sup>-02</sup> | 0.00011 (0.028)        | 1.00E+00              | 0.028 (0.019)       | 1.3x10 <sup>-01</sup> |
| <i>HMGB1</i>    | 13q12.3               | 17         | 0.18                 | -0.071 (0.035)              | 4.5x10 <sup>-02</sup> | 0.13 (0.11)            | 2.1x10 <sup>-01</sup> | -0.05 (0.034)       | 1.3x10 <sup>-01</sup> |
| <i>CHKB</i>     | 22q13.33              | 15         | 0.052                | -0.22 (0.082)               | 7.0x10 <sup>-03</sup> | 0.061 (0.087)          | 4.8x10 <sup>-01</sup> | -0.088 (0.059)      | 1.4x10 <sup>-01</sup> |
| <i>MAP1LC3A</i> | 20q11.22              | 22         | 0.18                 | -0.09 (0.040)               | 2.6x10 <sup>-02</sup> | 0.019 (0.049)          | 7.0x10 <sup>-01</sup> | -0.045 (0.031)      | 1.4x10 <sup>-01</sup> |
| <i>NDUFAF7</i>  | 2p22.2                | 11         | 0.029                | 0.27 (0.13)                 | 3.5x10 <sup>-02</sup> | -0.031 (0.15)          | 8.4x10 <sup>-01</sup> | 0.14 (0.097)        | 1.4x10 <sup>-01</sup> |
| <i>MOGS</i>     | 2p13.1                | 11         | 0.076                | 0.20 (0.070)                | 4.8x10 <sup>-03</sup> | -0.18 (0.11)           | 8.6x10 <sup>-02</sup> | 0.084 (0.058)       | 1.5x10 <sup>-01</sup> |
| <i>ZBTB25</i>   | 14q23.3               | 32         | 0.079                | 0.14 (0.056)                | 1.2x10 <sup>-02</sup> | -0.066 (0.073)         | 3.6x10 <sup>-01</sup> | 0.064 (0.044)       | 1.5x10 <sup>-01</sup> |
| <i>CLN8</i>     | 8p23.3                | 17         | 0.11                 | 0.18 (0.073)                | 1.5x10 <sup>-02</sup> | -0.033 (0.075)         | 6.6x10 <sup>-01</sup> | 0.075 (0.052)       | 1.5x10 <sup>-01</sup> |
| <i>PLEKHA1</i>  | 10q26.13              | 7          | 0.046                | 0.32 (0.13)                 | 1.6x10 <sup>-02</sup> | -0.1 (0.16)            | 5.3x10 <sup>-01</sup> | 0.15 (0.10)         | 1.5x10 <sup>-01</sup> |
| <i>SYT17</i>    | 16p12.3               | 19         | 0.031                | 0.20 (0.085)                | 1.7x10 <sup>-02</sup> | -0.15 (0.13)           | 2.8x10 <sup>-01</sup> | 0.10 (0.072)        | 1.5x10 <sup>-01</sup> |
| <i>ZNF302</i>   | 19q13.11              | 47         | 0.29                 | 0.081 (0.040)               | 4.1x10 <sup>-02</sup> | -0.0057 (0.045)        | 9.0x10 <sup>-01</sup> | 0.044 (0.030)       | 1.5x10 <sup>-01</sup> |
| <i>MAPRE3</i>   | 2p23.3                | 8          | 0.021                | -0.25 (0.11)                | 2.7x10 <sup>-02</sup> | 0.12 (0.16)            | 4.6x10 <sup>-01</sup> | -0.13 (0.092)       | 1.6x10 <sup>-01</sup> |
| <i>SPEF2</i>    | 5p13.2                | 73         | 0.033                | -0.077 (0.035)              | 2.8x10 <sup>-02</sup> | 0.043 (0.054)          | 4.2x10 <sup>-01</sup> | -0.041 (0.029)      | 1.6x10 <sup>-01</sup> |
| <i>PPME1</i>    | 11q13.4               | 37         | 0.041                | 0.14 (0.062)                | 2.0x10 <sup>-02</sup> | -0.042 (0.072)         | 5.6x10 <sup>-01</sup> | 0.065 (0.047)       | 1.7x10 <sup>-01</sup> |
| <i>ING5</i>     | 2q37.3                | 20         | 0.084                | -0.13 (0.061)               | 2.8x10 <sup>-02</sup> | 0.028 (0.068)          | 6.8x10 <sup>-01</sup> | -0.062 (0.045)      | 1.7x10 <sup>-01</sup> |
| <i>SLC38A4</i>  | 12q13.11              | 14         | 0.027                | 0.22 (0.10)                 | 3.3x10 <sup>-02</sup> | -0.034 (0.11)          | 7.6x10 <sup>-01</sup> | 0.10 (0.076)        | 1.7x10 <sup>-01</sup> |
| <i>GOLGA3</i>   | 12q24.33              | 44         | 0.034                | 0.10 (0.049)                | 3.4x10 <sup>-02</sup> | -0.038 (0.067)         | 5.8x10 <sup>-01</sup> | 0.055 (0.040)       | 1.7x10 <sup>-01</sup> |
| <i>CCDC149</i>  | 4p15.2                | 53         | 0.05                 | 0.11 (0.052)                | 4.0x10 <sup>-02</sup> | -0.021 (0.063)         | 7.4x10 <sup>-01</sup> | 0.055 (0.040)       | 1.7x10 <sup>-01</sup> |
| <i>TEX29</i>    | 13q34                 | 31         | 0.091                | 0.11 (0.057)                | 4.6x10 <sup>-02</sup> | -0.013 (0.067)         | 8.5x10 <sup>-01</sup> | 0.060 (0.043)       | 1.7x10 <sup>-01</sup> |

| Gene           | Location <sup>a</sup> | # SNPs in  | Imputation           | Discovery U4C Meta-analysis |                       | UK Biobank Replication |                       | Joint Meta-analysis |                       |
|----------------|-----------------------|------------|----------------------|-----------------------------|-----------------------|------------------------|-----------------------|---------------------|-----------------------|
|                |                       | Prediction | Quality <sup>b</sup> | Beta (SE)                   | p-value               | Beta (SE)              | p-value               | Beta (SE)           | p-value               |
| <i>ARVCF</i>   | 22q11.21              | 3          | 0.022                | 0.68 (0.34)                 | 4.7x10 <sup>-02</sup> | -0.65 (0.71)           | 3.6x10 <sup>-01</sup> | 0.43 (0.31)         | 1.7x10 <sup>-01</sup> |
| <i>HAUS6</i>   | 9p22.1                | 12         | 0.042                | -0.17 (0.077)               | 2.5x10 <sup>-02</sup> | 0.051 (0.091)          | 5.7x10 <sup>-01</sup> | -0.079 (0.058)      | 1.8x10 <sup>-01</sup> |
| <i>AP3B2</i>   | 15q25.2               | 17         | 0.29                 | 0.076 (0.037)               | 4.0x10 <sup>-02</sup> | -0.0083 (0.039)        | 8.3x10 <sup>-01</sup> | 0.036 (0.027)       | 1.8x10 <sup>-01</sup> |
| <i>ZNF575</i>  | 19q13.31              | 13         | 0.38                 | -0.11 (0.038)               | 5.4x10 <sup>-03</sup> | 0.049 (0.042)          | 2.5x10 <sup>-01</sup> | -0.037 (0.028)      | 1.9x10 <sup>-01</sup> |
| <i>NLK</i>     | 17q11.2               | 62         | 0.065                | -0.067 (0.027)              | 1.3x10 <sup>-02</sup> | 0.039 (0.036)          | 2.7x10 <sup>-01</sup> | -0.028 (0.022)      | 1.9x10 <sup>-01</sup> |
| <i>SPATA2L</i> | 16q24.3               | 12         | 0.048                | 0.19 (0.077)                | 1.4x10 <sup>-02</sup> | -0.086 (0.094)         | 3.6x10 <sup>-01</sup> | 0.078 (0.060)       | 1.9x10 <sup>-01</sup> |
| <i>NUDT19</i>  | 19q13.11              | 24         | 0.25                 | -0.079 (0.035)              | 2.3x10 <sup>-02</sup> | 0.040 (0.047)          | 3.9x10 <sup>-01</sup> | -0.037 (0.028)      | 1.9x10 <sup>-01</sup> |
| <i>RHBDL1</i>  | 16p13.3               | 24         | 0.058                | -0.15 (0.061)               | 1.5x10 <sup>-02</sup> | 0.081 (0.078)          | 3.0x10 <sup>-01</sup> | -0.061 (0.048)      | 2.0x10 <sup>-01</sup> |
| <i>VCPKMT</i>  | 14q21.3               | 1          | 0.035                | -0.26 (0.12)                | 2.4x10 <sup>-02</sup> | 0.24 (0.19)            | 2.2x10 <sup>-01</sup> | -0.13 (0.099)       | 2.0x10 <sup>-01</sup> |
| <i>ZNF592</i>  | 15q25.3               | 12         | 0.034                | -0.23 (0.10)                | 2.8x10 <sup>-02</sup> | 0.065 (0.12)           | 5.9x10 <sup>-01</sup> | -0.1 (0.079)        | 2.0x10 <sup>-01</sup> |
| <i>ANKRD36</i> | 2q11.2                | 52         | 0.1                  | 0.098 (0.041)               | 1.7x10 <sup>-02</sup> | -0.033 (0.045)         | 4.6x10 <sup>-01</sup> | 0.038 (0.030)       | 2.1x10 <sup>-01</sup> |
| <i>LPGAT1</i>  | 1q32.3                | 1          | 0.023                | -3.6 (1.6)                  | 2.9x10 <sup>-02</sup> | 1.5 (2.1)              | 4.5x10 <sup>-01</sup> | -1.6 (1.3)          | 2.1x10 <sup>-01</sup> |
| <i>RRAS</i>    | 19q13.33              | 6          | 0.074                | -0.17 (0.083)               | 3.7x10 <sup>-02</sup> | 0.068 (0.10)           | 5.2x10 <sup>-01</sup> | -0.081 (0.065)      | 2.1x10 <sup>-01</sup> |
| <i>ZMAT3</i>   | 3q26.32               | 27         | 0.029                | 0.14 (0.070)                | 4.2x10 <sup>-02</sup> | -0.044 (0.086)         | 6.1x10 <sup>-01</sup> | 0.068 (0.054)       | 2.1x10 <sup>-01</sup> |
| <i>ZNF461</i>  | 19q13.12              | 46         | 0.021                | -0.17 (0.055)               | 2.2x10 <sup>-03</sup> | 0.16 (0.074)           | 3.5x10 <sup>-02</sup> | -0.054 (0.044)      | 2.2x10 <sup>-01</sup> |
| <i>CCK</i>     | 3p22.1                | 24         | 0.02                 | 0.17 (0.078)                | 3.4x10 <sup>-02</sup> | -0.069 (0.098)         | 4.8x10 <sup>-01</sup> | 0.074 (0.061)       | 2.2x10 <sup>-01</sup> |
| <i>STX4</i>    | 16p11.2               | 25         | 0.032                | -0.17 (0.069)               | 1.5x10 <sup>-02</sup> | 0.080 (0.080)          | 3.2x10 <sup>-01</sup> | -0.062 (0.052)      | 2.3x10 <sup>-01</sup> |
| <i>STARD10</i> | 11q13.4               | 1          | 0.028                | 0.98 (0.47)                 | 3.9x10 <sup>-02</sup> | -0.34 (0.56)           | 5.5x10 <sup>-01</sup> | 0.43 (0.36)         | 2.3x10 <sup>-01</sup> |
| <i>SMPD2</i>   | 6q21                  | 15         | 0.083                | 0.17 (0.065)                | 7.7x10 <sup>-03</sup> | -0.13 (0.085)          | 1.2x10 <sup>-01</sup> | 0.060 (0.051)       | 2.4x10 <sup>-01</sup> |
| <i>ERI1</i>    | 8p23.1                | 22         | 0.059                | 0.13 (0.064)                | 3.4x10 <sup>-02</sup> | -0.063 (0.079)         | 4.3x10 <sup>-01</sup> | 0.058 (0.050)       | 2.5x10 <sup>-01</sup> |
| <i>HRCT1</i>   | 9p13.3                | 23         | 0.08                 | 0.13 (0.063)                | 3.8x10 <sup>-02</sup> | -0.043 (0.070)         | 5.3x10 <sup>-01</sup> | 0.053 (0.047)       | 2.6x10 <sup>-01</sup> |
| <i>TTC30A</i>  | 2q31.2                | 66         | 0.16                 | 0.074 (0.032)               | 1.9x10 <sup>-02</sup> | -0.084 (0.050)         | 9.5x10 <sup>-02</sup> | 0.030 (0.027)       | 2.7x10 <sup>-01</sup> |
| <i>MT1A</i>    | 16q12.2               | 25         | 0.057                | -0.14 (0.061)               | 2.0x10 <sup>-02</sup> | 0.14 (0.092)           | 1.3x10 <sup>-01</sup> | -0.056 (0.051)      | 2.7x10 <sup>-01</sup> |
| <i>C1QTNF4</i> | 11p11.2               | 17         | 0.083                | 0.14 (0.062)                | 2.6x10 <sup>-02</sup> | -0.079 (0.078)         | 3.1x10 <sup>-01</sup> | 0.054 (0.049)       | 2.7x10 <sup>-01</sup> |
| <i>PACRGL</i>  | 4p15.31               | 37         | 0.14                 | 0.086 (0.042)               | 4.0x10 <sup>-02</sup> | -0.034 (0.049)         | 4.8x10 <sup>-01</sup> | 0.035 (0.032)       | 2.7x10 <sup>-01</sup> |
| <i>CALML6</i>  | 1p36.33               | 11         | 0.2                  | 0.10 (0.049)                | 3.3x10 <sup>-02</sup> | -0.056 (0.061)         | 3.5x10 <sup>-01</sup> | 0.041 (0.038)       | 2.8x10 <sup>-01</sup> |
| <i>GNPDA2</i>  | 4p12                  | 47         | 0.22                 | -0.057 (0.027)              | 3.7x10 <sup>-02</sup> | 0.048 (0.040)          | 2.3x10 <sup>-01</sup> | -0.024 (0.022)      | 2.9x10 <sup>-01</sup> |

| Gene                | Location <sup>a</sup> | # SNPs in Prediction | Imputation Quality <sup>b</sup> | Discovery U4C Meta-analysis |                       | UK Biobank Replication |                       | Joint Meta-analysis |                       |
|---------------------|-----------------------|----------------------|---------------------------------|-----------------------------|-----------------------|------------------------|-----------------------|---------------------|-----------------------|
|                     |                       |                      |                                 | Beta (SE)                   | p-value               | Beta (SE)              | p-value               | Beta (SE)           | p-value               |
| <i>FZD9</i>         | 7q11.23               | 2                    | 0.037                           | 0.31 (0.15)                 | 3.3x10 <sup>-02</sup> | -0.16 (0.18)           | 3.6x10 <sup>-01</sup> | 0.12 (0.11)         | 3.0x10 <sup>-01</sup> |
| <i>MTBP</i>         | 8q24.12               | 15                   | 0.055                           | -0.15 (0.076)               | 4.2x10 <sup>-02</sup> | 0.19 (0.13)            | 1.4x10 <sup>-01</sup> | -0.068 (0.066)      | 3.0x10 <sup>-01</sup> |
| <i>B3GAT2</i>       | 6q13                  | 64                   | 0.14                            | 0.083 (0.033)               | 1.2x10 <sup>-02</sup> | -0.063 (0.041)         | 1.3x10 <sup>-01</sup> | 0.026 (0.026)       | 3.1x10 <sup>-01</sup> |
| <i>MCM3AP</i>       | 21q22.3               | 5                    | 0.09                            | -0.18 (0.074)               | 1.7x10 <sup>-02</sup> | 0.11 (0.088)           | 2.0x10 <sup>-01</sup> | -0.058 (0.057)      | 3.1x10 <sup>-01</sup> |
| <i>TLL13</i>        | 15q26.1               | 24                   | 0.029                           | 0.14 (0.066)                | 3.6x10 <sup>-02</sup> | -0.11 (0.094)          | 2.3x10 <sup>-01</sup> | 0.056 (0.054)       | 3.1x10 <sup>-01</sup> |
| <i>SULF2</i>        | 20q13.13              | 9                    | 0.037                           | -0.2 (0.098)                | 4.0x10 <sup>-02</sup> | 0.13 (0.13)            | 3.1x10 <sup>-01</sup> | -0.077 (0.077)      | 3.1x10 <sup>-01</sup> |
| <i>TNNI3K</i>       | 1p31.1                | 28                   | 0.11                            | -0.097 (0.044)              | 2.9x10 <sup>-02</sup> | 0.11 (0.069)           | 1.1x10 <sup>-01</sup> | -0.037 (0.037)      | 3.2x10 <sup>-01</sup> |
| <i>MYOZ3</i>        | 5q33.1                | 53                   | 0.019                           | -0.13 (0.062)               | 3.5x10 <sup>-02</sup> | 0.068 (0.073)          | 3.5x10 <sup>-01</sup> | -0.048 (0.048)      | 3.2x10 <sup>-01</sup> |
| <i>EDC4</i>         | 16q22.1               | 18                   | 0.052                           | -0.15 (0.071)               | 4.0x10 <sup>-02</sup> | 0.082 (0.087)          | 3.5x10 <sup>-01</sup> | -0.055 (0.055)      | 3.2x10 <sup>-01</sup> |
| <i>ZNF660</i>       | 3p21.31               | 54                   | 0.34                            | 0.056 (0.026)               | 3.3x10 <sup>-02</sup> | -0.031 (0.031)         | 3.2x10 <sup>-01</sup> | 0.020 (0.020)       | 3.3x10 <sup>-01</sup> |
| <i>MSR1</i>         | 8p22                  | 9                    | 0.024                           | 0.32 (0.12)                 | 8.7x10 <sup>-03</sup> | -0.2 (0.13)            | 1.5x10 <sup>-01</sup> | 0.086 (0.091)       | 3.4x10 <sup>-01</sup> |
| <i>MYLK2</i>        | 20q11.21              | 8                    | 0.031                           | 0.31 (0.14)                 | 2.8x10 <sup>-02</sup> | -0.061 (0.11)          | 5.8x10 <sup>-01</sup> | 0.081 (0.086)       | 3.5x10 <sup>-01</sup> |
| <i>TMEM206</i>      | 1q32.3                | 22                   | 0.049                           | 0.13 (0.054)                | 1.6x10 <sup>-02</sup> | -0.26 (0.10)           | 9.7x10 <sup>-03</sup> | 0.044 (0.048)       | 3.6x10 <sup>-01</sup> |
| <i>NARF</i>         | 17q25.3               | 12                   | 0.17                            | -0.13 (0.053)               | 1.7x10 <sup>-02</sup> | 0.093 (0.064)          | 1.5x10 <sup>-01</sup> | -0.037 (0.041)      | 3.6x10 <sup>-01</sup> |
| <i>ZNF502</i>       | 3p21.31               | 13                   | 0.21                            | -0.14 (0.060)               | 1.9x10 <sup>-02</sup> | 0.060 (0.059)          | 3.1x10 <sup>-01</sup> | -0.038 (0.042)      | 3.6x10 <sup>-01</sup> |
| <i>DOCK8</i>        | 9p24.3                | 22                   | 0.11                            | -0.11 (0.057)               | 4.9x10 <sup>-02</sup> | 0.024 (0.049)          | 6.3x10 <sup>-01</sup> | -0.034 (0.037)      | 3.6x10 <sup>-01</sup> |
| <i>PXK</i>          | 3p14.3                | 8                    | 0.069                           | 0.22 (0.076)                | 4.5x10 <sup>-03</sup> | -0.21 (0.097)          | 3.1x10 <sup>-02</sup> | 0.054 (0.060)       | 3.7x10 <sup>-01</sup> |
| <i>EPHB1</i>        | 3q22.2                | 37                   | 0.055                           | -0.16 (0.065)               | 1.5x10 <sup>-02</sup> | 0.082 (0.067)          | 2.2x10 <sup>-01</sup> | -0.042 (0.047)      | 3.7x10 <sup>-01</sup> |
| <i>ZNF131</i>       | 5p12                  | 19                   | 0.047                           | -0.14 (0.067)               | 4.3x10 <sup>-02</sup> | 0.073 (0.076)          | 3.3x10 <sup>-01</sup> | -0.044 (0.050)      | 3.8x10 <sup>-01</sup> |
| <i>PRIMPOL</i>      | 4q35.1                | 51                   | 0.13                            | -0.083 (0.040)              | 4.1x10 <sup>-02</sup> | 0.053 (0.048)          | 2.7x10 <sup>-01</sup> | -0.027 (0.031)      | 3.9x10 <sup>-01</sup> |
| <i>AGAP9</i>        | 10q11.22              | 10                   | 0.065                           | -0.15 (0.070)               | 3.6x10 <sup>-02</sup> | 0.13 (0.092)           | 1.6x10 <sup>-01</sup> | -0.046 (0.056)      | 4.1x10 <sup>-01</sup> |
| <i>BCAT1</i>        | 12p12.1               | 14                   | 0.027                           | -0.17 (0.083)               | 3.7x10 <sup>-02</sup> | 0.17 (0.11)            | 1.4x10 <sup>-01</sup> | -0.056 (0.067)      | 4.1x10 <sup>-01</sup> |
| <i>SVIP</i>         | 11p14.3               | 17                   | 0.16                            | 0.15 (0.066)                | 2.7x10 <sup>-02</sup> | -0.064 (0.063)         | 3.1x10 <sup>-01</sup> | 0.035 (0.046)       | 4.4x10 <sup>-01</sup> |
| <i>MYH1</i>         | 17p13.1               | 54                   | 0.032                           | -0.12 (0.052)               | 2.8x10 <sup>-02</sup> | 0.11 (0.066)           | 1.1x10 <sup>-01</sup> | -0.03 (0.041)       | 4.7x10 <sup>-01</sup> |
| <i>TOX2</i>         | 20q13.12              | 32                   | 0.33                            | 0.068 (0.033)               | 3.9x10 <sup>-02</sup> | -0.058 (0.041)         | 1.6x10 <sup>-01</sup> | 0.018 (0.026)       | 4.7x10 <sup>-01</sup> |
| <i>RP11-295P9.3</i> | 10p13                 | 17                   | 0.15                            | 0.11 (0.055)                | 4.5x10 <sup>-02</sup> | -0.092 (0.068)         | 1.7x10 <sup>-01</sup> | 0.030 (0.042)       | 4.8x10 <sup>-01</sup> |
| <i>SGCG</i>         | 13q12.12              | 1                    | 0.049                           | -2.9 (1.2)                  | 1.7x10 <sup>-02</sup> | 1.3 (1.1)              | 2.2x10 <sup>-01</sup> | -0.55 (0.80)        | 4.9x10 <sup>-01</sup> |

| Gene           | Location <sup>a</sup> | # SNPs in Imputation |                      | Discovery U4C Meta-analysis |                       | UK Biobank Replication |                       | Joint Meta-analysis |                       |
|----------------|-----------------------|----------------------|----------------------|-----------------------------|-----------------------|------------------------|-----------------------|---------------------|-----------------------|
|                |                       | Prediction           | Quality <sup>b</sup> | Beta (SE)                   | p-value               | Beta (SE)              | p-value               | Beta (SE)           | p-value               |
| <i>TRMT61B</i> | 2p23.2                | 20                   | 0.2                  | -0.088 (0.044)              | 4.4x10 <sup>-02</sup> | 0.069 (0.052)          | 1.8x10 <sup>-01</sup> | -0.022 (0.033)      | 5.0x10 <sup>-01</sup> |
| <i>PHYHIPL</i> | 10q21.1               | 31                   | 0.022                | 0.16 (0.060)                | 8.4x10 <sup>-03</sup> | -0.22 (0.085)          | 9.0x10 <sup>-03</sup> | 0.032 (0.049)       | 5.1x10 <sup>-01</sup> |
| <i>TMEM98</i>  | 17q11.2               | 14                   | 0.047                | -0.23 (0.089)               | 1.0x10 <sup>-02</sup> | 0.28 (0.11)            | 1.4x10 <sup>-02</sup> | -0.036 (0.070)      | 6.0x10 <sup>-01</sup> |
| <i>ZNF501</i>  | 3p21.31               | 2                    | 0.12                 | -0.21 (0.095)               | 2.6x10 <sup>-02</sup> | 0.14 (0.093)           | 1.5x10 <sup>-01</sup> | -0.035 (0.067)      | 6.0x10 <sup>-01</sup> |
| <i>COLEC11</i> | 2p25.3                | 33                   | 0.026                | 0.17 (0.068)                | 1.5x10 <sup>-02</sup> | -0.22 (0.092)          | 1.5x10 <sup>-02</sup> | 0.027 (0.055)       | 6.2x10 <sup>-01</sup> |
| <i>HAGH</i>    | 16p13.3               | 14                   | 0.098                | 0.13 (0.060)                | 3.3x10 <sup>-02</sup> | -0.14 (0.074)          | 5.9x10 <sup>-02</sup> | 0.022 (0.047)       | 6.4x10 <sup>-01</sup> |
| <i>HELLS</i>   | 10q23.33              | 32                   | 0.049                | 0.18 (0.079)                | 1.9x10 <sup>-02</sup> | -0.23 (0.10)           | 2.4x10 <sup>-02</sup> | 0.028 (0.062)       | 6.5x10 <sup>-01</sup> |
| <i>KAT8</i>    | 16p11.2               | 38                   | 0.24                 | -0.068 (0.033)              | 3.8x10 <sup>-02</sup> | 0.047 (0.033)          | 1.5x10 <sup>-01</sup> | -0.011 (0.023)      | 6.5x10 <sup>-01</sup> |
| <i>LRRFIP1</i> | 2q37.3                | 15                   | 0.024                | -0.23 (0.11)                | 3.3x10 <sup>-02</sup> | 0.31 (0.14)            | 3.4x10 <sup>-02</sup> | -0.038 (0.086)      | 6.6x10 <sup>-01</sup> |
| <i>ZNF709</i>  | 19p13.2               | 20                   | 0.027                | 0.21 (0.096)                | 2.9x10 <sup>-02</sup> | -0.18 (0.10)           | 7.7x10 <sup>-02</sup> | 0.029 (0.071)       | 6.8x10 <sup>-01</sup> |
| <i>RGS17</i>   | 6q25.2                | 1                    | 0.038                | 2.2 (1.1)                   | 4.6x10 <sup>-02</sup> | -1.2 (0.97)            | 2.3x10 <sup>-01</sup> | 0.30 (0.73)         | 6.8x10 <sup>-01</sup> |
| <i>MSH4</i>    | 1p31.1                | 27                   | 0.12                 | 0.10 (0.050)                | 4.4x10 <sup>-02</sup> | -0.085 (0.052)         | 1.1x10 <sup>-01</sup> | 0.013 (0.036)       | 7.2x10 <sup>-01</sup> |
| <i>COMMD10</i> | 5q23.1                | 57                   | 0.1                  | 0.085 (0.042)               | 4.3x10 <sup>-02</sup> | -0.13 (0.055)          | 1.6x10 <sup>-02</sup> | 0.0053 (0.033)      | 8.7x10 <sup>-01</sup> |

**(B) Whole Blood Expression**

| Gene            | Location <sup>a</sup> | # SNPs in Prediction | Imputation Quality <sup>b</sup> | Discovery U4C Meta-analysis |                       | UK Biobank Replication |                       | Joint Meta-analysis |                       |
|-----------------|-----------------------|----------------------|---------------------------------|-----------------------------|-----------------------|------------------------|-----------------------|---------------------|-----------------------|
|                 |                       |                      |                                 | Beta (SE)                   | p-value               | Beta (SE)              | p-value               | Beta (SE)           | p-value               |
| <i>RCCD1</i>    | 15q26.1               | 20                   | 0.35                            | -0.074 (0.026)              | 4.7x10 <sup>-03</sup> | -0.14 (0.039)          | 2.7x10 <sup>-04</sup> | -0.095 (0.022)      | 1.2x10 <sup>-05</sup> |
| <i>ACAP1</i>    | 17p13.1               | 19                   | 0.39                            | 0.098 (0.037)               | 7.9x10 <sup>-03</sup> | 0.11 (0.033)           | 7.9x10 <sup>-04</sup> | 0.11 (0.025)        | 1.9x10 <sup>-05</sup> |
| <i>LRRC25</i>   | 19p13.11              | 33                   | 0.35                            | 0.086 (0.029)               | 2.7x10 <sup>-03</sup> | 0.094 (0.034)          | 6.5x10 <sup>-03</sup> | 0.089 (0.022)       | 5.2x10 <sup>-05</sup> |
| <i>TMEM150C</i> | 4q21.22               | 18                   | 0.12                            | 0.16 (0.058)                | 4.7x10 <sup>-03</sup> | 0.17 (0.065)           | 9.9x10 <sup>-03</sup> | 0.17 (0.043)        | 1.3x10 <sup>-04</sup> |
| <i>TNNT3</i>    | 11p15.5               | 11                   | 0.38                            | 0.080 (0.028)               | 3.9x10 <sup>-03</sup> | 0.084 (0.035)          | 1.7x10 <sup>-02</sup> | 0.082 (0.022)       | 1.8x10 <sup>-04</sup> |
| <i>HP</i>       | 16q22.2               | 20                   | 0.49                            | 0.11 (0.024)                | 7.2x10 <sup>-06</sup> | 0.011 (0.029)          | 7.0x10 <sup>-01</sup> | 0.069 (0.019)       | 2.1x10 <sup>-04</sup> |
| <i>CTDNEP1</i>  | 17p13.1               | 22                   | 0.14                            | 0.15 (0.050)                | 3.0x10 <sup>-03</sup> | 0.13 (0.058)           | 3.1x10 <sup>-02</sup> | 0.14 (0.038)        | 2.5x10 <sup>-04</sup> |
| <i>DHODH</i>    | 16q22.2               | 59                   | 0.1                             | -0.14 (0.041)               | 4.2x10 <sup>-04</sup> | -0.074 (0.053)         | 1.6x10 <sup>-01</sup> | -0.12 (0.032)       | 2.6x10 <sup>-04</sup> |
| <i>DPY19L1</i>  | 7p14.2                | 24                   | 0.3                             | 0.11 (0.029)                | 7.9x10 <sup>-05</sup> | 0.030 (0.038)          | 4.3x10 <sup>-01</sup> | 0.084 (0.023)       | 2.8x10 <sup>-04</sup> |
| <i>KIN</i>      | 10p14                 | 23                   | 0.11                            | 0.12 (0.054)                | 2.6x10 <sup>-02</sup> | 0.19 (0.066)           | 4.6x10 <sup>-03</sup> | 0.15 (0.042)        | 4.3x10 <sup>-04</sup> |
| <i>APOBEC3A</i> | 22q13.1               | 78                   | 0.16                            | -0.10 (0.036)               | 5.7x10 <sup>-03</sup> | -0.094 (0.045)         | 3.9x10 <sup>-02</sup> | -0.098 (0.028)      | 5.6x10 <sup>-04</sup> |
| <i>KCTD11</i>   | 17p13.1               | 37                   | 0.25                            | -0.093 (0.047)              | 4.8x10 <sup>-02</sup> | -0.12 (0.041)          | 4.7x10 <sup>-03</sup> | -0.11 (0.031)       | 6.0x10 <sup>-04</sup> |
| <i>VEZT</i>     | 12q22                 | 4                    | 0.0077                          | -0.41 (0.18)                | 2.1x10 <sup>-02</sup> | -0.97 (0.33)           | 3.8x10 <sup>-03</sup> | -0.54 (0.16)        | 6.7x10 <sup>-04</sup> |
| <i>CCNE1</i>    | 19q12                 | 6                    | 0.015                           | -0.59 (0.29)                | 4.1x10 <sup>-02</sup> | -0.65 (0.24)           | 7.6x10 <sup>-03</sup> | -0.63 (0.19)        | 7.9x10 <sup>-04</sup> |
| <i>SCN4B</i>    | 11q23.3               | 33                   | 0.05                            | -0.15 (0.078)               | 5.0x10 <sup>-02</sup> | -0.27 (0.095)          | 4.5x10 <sup>-03</sup> | -0.20 (0.060)       | 9.0x10 <sup>-04</sup> |
| <i>ALDH5A1</i>  | 6p22.3                | 45                   | 0.11                            | -0.098 (0.046)              | 3.3x10 <sup>-02</sup> | -0.17 (0.063)          | 7.4x10 <sup>-03</sup> | -0.12 (0.037)       | 9.7x10 <sup>-04</sup> |
| <i>GIT1</i>     | 17q11.2               | 31                   | 0.4                             | -0.053 (0.026)              | 4.0x10 <sup>-02</sup> | -0.086 (0.032)         | 7.0x10 <sup>-03</sup> | -0.066 (0.020)      | 9.9x10 <sup>-04</sup> |
| <i>KCNAB3</i>   | 17p13.1               | 34                   | 0.093                           | -0.17 (0.063)               | 5.5x10 <sup>-03</sup> | -0.13 (0.073)          | 7.8x10 <sup>-02</sup> | -0.16 (0.048)       | 1.1x10 <sup>-03</sup> |
| <i>ELL</i>      | 19p13.11              | 37                   | 0.34                            | -0.071 (0.029)              | 1.6x10 <sup>-02</sup> | -0.076 (0.035)         | 2.8x10 <sup>-02</sup> | -0.073 (0.022)      | 1.1x10 <sup>-03</sup> |
| <i>ZNF23</i>    | 16q22.2               | 25                   | 0.15                            | 0.11 (0.050)                | 2.1x10 <sup>-02</sup> | 0.13 (0.054)           | 2.0x10 <sup>-02</sup> | 0.12 (0.037)        | 1.1x10 <sup>-03</sup> |
| <i>ACADVL</i>   | 17p13.1               | 23                   | 0.12                            | -0.14 (0.055)               | 1.3x10 <sup>-02</sup> | -0.13 (0.065)          | 4.0x10 <sup>-02</sup> | -0.14 (0.042)       | 1.2x10 <sup>-03</sup> |
| <i>ITGB7</i>    | 12q13.13              | 25                   | 0.17                            | -0.080 (0.026)              | 2.3x10 <sup>-03</sup> | -0.057 (0.052)         | 2.8x10 <sup>-01</sup> | -0.076 (0.024)      | 1.3x10 <sup>-03</sup> |
| <i>DPYD</i>     | 1p21.3                | 108                  | 0.13                            | -0.073 (0.037)              | 4.8x10 <sup>-02</sup> | -0.14 (0.051)          | 6.0x10 <sup>-03</sup> | -0.096 (0.030)      | 1.3x10 <sup>-03</sup> |
| <i>AP1B1</i>    | 22q12.2               | 12                   | 0.04                            | -0.21 (0.082)               | 9.9x10 <sup>-03</sup> | -0.21 (0.11)           | 6.2x10 <sup>-02</sup> | -0.21 (0.066)       | 1.4x10 <sup>-03</sup> |

| Gene            | Location <sup>a</sup> | # SNPs in  | Imputation           | Discovery U4C Meta-analysis |                       | UK Biobank Replication |                       | Joint Meta-analysis |                       |
|-----------------|-----------------------|------------|----------------------|-----------------------------|-----------------------|------------------------|-----------------------|---------------------|-----------------------|
|                 |                       | Prediction | Quality <sup>b</sup> | Beta (SE)                   | p-value               | Beta (SE)              | p-value               | Beta (SE)           | p-value               |
| <i>SASS6</i>    | 1p21.2                | 24         | 0.019                | -0.24 (0.11)                | 2.3x10 <sup>-02</sup> | -0.32 (0.14)           | 2.6x10 <sup>-02</sup> | -0.27 (0.086)       | 1.6x10 <sup>-03</sup> |
| <i>TTLL5</i>    | 14q24.3               | 27         | 0.16                 | 0.13 (0.048)                | 6.4x10 <sup>-03</sup> | 0.092 (0.058)          | 1.1x10 <sup>-01</sup> | 0.11 (0.037)        | 1.8x10 <sup>-03</sup> |
| <i>ZNF564</i>   | 19p13.2               | 24         | 0.011                | -0.27 (0.10)                | 8.5x10 <sup>-03</sup> | -0.26 (0.15)           | 9.4x10 <sup>-02</sup> | -0.27 (0.085)       | 1.8x10 <sup>-03</sup> |
| <i>GPM6A</i>    | 4q34.2                | 20         | 0.39                 | -0.043 (0.021)              | 4.4x10 <sup>-02</sup> | -0.087 (0.033)         | 8.6x10 <sup>-03</sup> | -0.056 (0.018)      | 1.8x10 <sup>-03</sup> |
| <i>KLHL28</i>   | 14q21.2               | 55         | 0.022                | 0.16 (0.069)                | 1.7x10 <sup>-02</sup> | 0.21 (0.10)            | 4.3x10 <sup>-02</sup> | 0.18 (0.057)        | 1.9x10 <sup>-03</sup> |
| <i>POLN</i>     | 4p16.3                | 41         | 0.079                | -0.097 (0.033)              | 2.9x10 <sup>-03</sup> | -0.066 (0.075)         | 3.7x10 <sup>-01</sup> | -0.092 (0.030)      | 2.0x10 <sup>-03</sup> |
| <i>CCT5</i>     | 5p15.2                | 21         | 0.042                | -0.22 (0.085)               | 8.4x10 <sup>-03</sup> | -0.22 (0.14)           | 1.1x10 <sup>-01</sup> | -0.22 (0.072)       | 2.0x10 <sup>-03</sup> |
| <i>CC2D1A</i>   | 19p13.12              | 19         | 0.037                | -0.27 (0.098)               | 6.1x10 <sup>-03</sup> | -0.17 (0.11)           | 1.3x10 <sup>-01</sup> | -0.23 (0.074)       | 2.1x10 <sup>-03</sup> |
| <i>SSBP4</i>    | 19p13.11              | 29         | 0.067                | 0.15 (0.061)                | 1.6x10 <sup>-02</sup> | 0.15 (0.079)           | 5.4x10 <sup>-02</sup> | 0.15 (0.048)        | 2.1x10 <sup>-03</sup> |
| <i>KBTBD3</i>   | 11q22.3               | 32         | 0.051                | 0.15 (0.075)                | 4.5x10 <sup>-02</sup> | 0.24 (0.097)           | 1.4x10 <sup>-02</sup> | 0.18 (0.059)        | 2.1x10 <sup>-03</sup> |
| <i>MAN2C1</i>   | 15q24.2               | 45         | 0.77                 | -0.051 (0.017)              | 2.1x10 <sup>-03</sup> | -0.022 (0.022)         | 3.2x10 <sup>-01</sup> | -0.040 (0.013)      | 2.2x10 <sup>-03</sup> |
| <i>FAM103A1</i> | 15q25.2               | 29         | 0.013                | -0.23 (0.085)               | 5.6x10 <sup>-03</sup> | -0.15 (0.11)           | 1.6x10 <sup>-01</sup> | -0.20 (0.067)       | 2.3x10 <sup>-03</sup> |
| <i>SLC35E2B</i> | 1p36.33               | 18         | 0.081                | -0.20 (0.085)               | 1.8x10 <sup>-02</sup> | -0.17 (0.085)          | 5.2x10 <sup>-02</sup> | -0.18 (0.060)       | 2.4x10 <sup>-03</sup> |
| <i>TP53INP2</i> | 20q11.22              | 6          | 0.02                 | -0.50 (0.13)                | 1.0x10 <sup>-04</sup> | 0.004 (0.16)           | 9.8x10 <sup>-01</sup> | -0.30 (0.10)        | 2.5x10 <sup>-03</sup> |
| <i>ZNF578</i>   | 19q13.41              | 9          | 0.028                | 0.26 (0.11)                 | 1.4x10 <sup>-02</sup> | 0.30 (0.17)            | 8.0x10 <sup>-02</sup> | 0.27 (0.090)        | 2.6x10 <sup>-03</sup> |
| <i>THUMPD1</i>  | 16p12.3               | 57         | 0.23                 | 0.12 (0.043)                | 3.5x10 <sup>-03</sup> | 0.059 (0.048)          | 2.2x10 <sup>-01</sup> | 0.095 (0.032)       | 2.7x10 <sup>-03</sup> |
| <i>STX16</i>    | 20q13.32              | 22         | 0.066                | -0.18 (0.069)               | 9.2x10 <sup>-03</sup> | -0.13 (0.084)          | 1.4x10 <sup>-01</sup> | -0.16 (0.054)       | 3.1x10 <sup>-03</sup> |
| <i>CA12</i>     | 15q22.2               | 42         | 0.026                | -0.21 (0.086)               | 1.2x10 <sup>-02</sup> | -0.19 (0.12)           | 1.1x10 <sup>-01</sup> | -0.20 (0.069)       | 3.1x10 <sup>-03</sup> |
| <i>UBE4A</i>    | 11q23.3               | 29         | 0.057                | -0.16 (0.075)               | 3.9x10 <sup>-02</sup> | -0.19 (0.093)          | 3.6x10 <sup>-02</sup> | -0.17 (0.058)       | 3.4x10 <sup>-03</sup> |
| <i>PLEKHJ1</i>  | 19p13.3               | 10         | 0.044                | 0.20 (0.064)                | 1.4x10 <sup>-03</sup> | 0.016 (0.12)           | 8.9x10 <sup>-01</sup> | 0.17 (0.057)        | 3.6x10 <sup>-03</sup> |
| <i>TMIGD2</i>   | 19p13.3               | 18         | 0.085                | -0.17 (0.060)               | 5.2x10 <sup>-03</sup> | -0.088 (0.080)         | 2.7x10 <sup>-01</sup> | -0.14 (0.048)       | 3.7x10 <sup>-03</sup> |
| <i>ABHD8</i>    | 19p13.11              | 11         | 0.11                 | 0.16 (0.054)                | 4.2x10 <sup>-03</sup> | 0.071 (0.070)          | 3.1x10 <sup>-01</sup> | 0.12 (0.043)        | 3.9x10 <sup>-03</sup> |
| <i>ITGA2</i>    | 5q11.2                | 49         | 0.12                 | 0.10 (0.043)                | 1.6x10 <sup>-02</sup> | 0.093 (0.059)          | 1.2x10 <sup>-01</sup> | 0.10 (0.035)        | 4.0x10 <sup>-03</sup> |
| <i>DONSON</i>   | 21q22.11              | 23         | 0.014                | 0.40 (0.14)                 | 3.1x10 <sup>-03</sup> | 0.15 (0.16)            | 3.5x10 <sup>-01</sup> | 0.30 (0.10)         | 4.1x10 <sup>-03</sup> |
| <i>SLFN11</i>   | 17q12                 | 35         | 0.079                | 0.093 (0.045)               | 3.8x10 <sup>-02</sup> | 0.15 (0.073)           | 3.4x10 <sup>-02</sup> | 0.11 (0.038)        | 4.1x10 <sup>-03</sup> |
| <i>XRCC2</i>    | 7q36.1                | 18         | 0.15                 | 0.13 (0.051)                | 9.5x10 <sup>-03</sup> | 0.078 (0.054)          | 1.5x10 <sup>-01</sup> | 0.11 (0.037)        | 4.2x10 <sup>-03</sup> |
| <i>HRSP12</i>   | 8q22.2                | 38         | 0.09                 | -0.16 (0.058)               | 6.5x10 <sup>-03</sup> | -0.082 (0.071)         | 2.5x10 <sup>-01</sup> | -0.13 (0.045)       | 4.5x10 <sup>-03</sup> |

| Gene            | Location <sup>a</sup> | # SNPs in  | Imputation           | Discovery U4C Meta-analysis |                       | UK Biobank Replication |                       | Joint Meta-analysis |                       |
|-----------------|-----------------------|------------|----------------------|-----------------------------|-----------------------|------------------------|-----------------------|---------------------|-----------------------|
|                 |                       | Prediction | Quality <sup>b</sup> | Beta (SE)                   | p-value               | Beta (SE)              | p-value               | Beta (SE)           | p-value               |
| <i>PRKG2</i>    | 4q21.21               | 32         | 0.15                 | -0.097 (0.040)              | 1.7x10 <sup>-02</sup> | -0.088 (0.057)         | 1.2x10 <sup>-01</sup> | -0.094 (0.033)      | 4.5x10 <sup>-03</sup> |
| <i>EEA1</i>     | 12q22                 | 22         | 0.008                | -0.38 (0.17)                | 2.5x10 <sup>-02</sup> | -0.36 (0.21)           | 8.2x10 <sup>-02</sup> | -0.37 (0.13)        | 4.5x10 <sup>-03</sup> |
| <i>NYNRIN</i>   | 14q12                 | 76         | 0.052                | -0.12 (0.049)               | 1.6x10 <sup>-02</sup> | -0.10 (0.066)          | 1.4x10 <sup>-01</sup> | -0.11 (0.039)       | 4.7x10 <sup>-03</sup> |
| <i>RPS10</i>    | 6p21.31               | 29         | 0.035                | 0.17 (0.059)                | 4.3x10 <sup>-03</sup> | 0.070 (0.11)           | 5.4x10 <sup>-01</sup> | 0.15 (0.053)        | 4.8x10 <sup>-03</sup> |
| <i>TMEM143</i>  | 19q13.33              | 9          | 0.059                | 0.21 (0.092)                | 2.1x10 <sup>-02</sup> | 0.17 (0.100)           | 9.7x10 <sup>-02</sup> | 0.19 (0.068)        | 4.8x10 <sup>-03</sup> |
| <i>GLI3</i>     | 7p14.1                | 16         | 0.043                | 0.22 (0.100)                | 2.7x10 <sup>-02</sup> | 0.21 (0.12)            | 7.8x10 <sup>-02</sup> | 0.22 (0.077)        | 4.8x10 <sup>-03</sup> |
| <i>ZNF879</i>   | 5q35.3                | 16         | 0.18                 | -0.086 (0.035)              | 1.4x10 <sup>-02</sup> | -0.072 (0.052)         | 1.6x10 <sup>-01</sup> | -0.081 (0.029)      | 4.9x10 <sup>-03</sup> |
| <i>UGGT2</i>    | 13q32.1               | 47         | 0.15                 | -0.091 (0.043)              | 3.2x10 <sup>-02</sup> | -0.096 (0.053)         | 6.8x10 <sup>-02</sup> | -0.093 (0.033)      | 4.9x10 <sup>-03</sup> |
| <i>MYCL1</i>    | 1p34.2                | 25         | 0.014                | -0.25 (0.12)                | 3.9x10 <sup>-02</sup> | -0.26 (0.14)           | 5.8x10 <sup>-02</sup> | -0.26 (0.092)       | 5.1x10 <sup>-03</sup> |
| <i>ELF3</i>     | 1q32.1                | 53         | 0.28                 | -0.093 (0.029)              | 1.3x10 <sup>-03</sup> | -0.015 (0.037)         | 6.9x10 <sup>-01</sup> | -0.064 (0.023)      | 5.4x10 <sup>-03</sup> |
| <i>CCDC117</i>  | 22q12.1               | 24         | 0.02                 | 0.29 (0.10)                 | 4.1x10 <sup>-03</sup> | 0.11 (0.15)            | 4.6x10 <sup>-01</sup> | 0.23 (0.084)        | 5.4x10 <sup>-03</sup> |
| <i>CRCP</i>     | 7q11.21               | 47         | 0.12                 | -0.082 (0.034)              | 1.6x10 <sup>-02</sup> | -0.070 (0.049)         | 1.5x10 <sup>-01</sup> | -0.078 (0.028)      | 5.4x10 <sup>-03</sup> |
| <i>KCNIP2</i>   | 10q24.32              | 13         | 0.055                | -0.24 (0.083)               | 3.5x10 <sup>-03</sup> | -0.080 (0.12)          | 5.0x10 <sup>-01</sup> | -0.19 (0.068)       | 5.5x10 <sup>-03</sup> |
| <i>RDBP</i>     | 6p21.33               | 17         | 0.076                | -0.16 (0.059)               | 7.4x10 <sup>-03</sup> | -0.085 (0.083)         | 3.1x10 <sup>-01</sup> | -0.13 (0.048)       | 5.5x10 <sup>-03</sup> |
| <i>ZSCAN20</i>  | 1p35.1                | 46         | 0.015                | 0.17 (0.084)                | 4.2x10 <sup>-02</sup> | 0.22 (0.11)            | 5.4x10 <sup>-02</sup> | 0.19 (0.068)        | 5.5x10 <sup>-03</sup> |
| <i>TRAF3IP3</i> | 1q32.2                | 41         | 0.21                 | -0.11 (0.036)               | 2.0x10 <sup>-03</sup> | -0.026 (0.045)         | 5.6x10 <sup>-01</sup> | -0.078 (0.028)      | 5.6x10 <sup>-03</sup> |
| <i>STAP2</i>    | 19p13.3               | 14         | 0.054                | 0.21 (0.083)                | 1.1x10 <sup>-02</sup> | 0.13 (0.11)            | 2.1x10 <sup>-01</sup> | 0.18 (0.065)        | 5.6x10 <sup>-03</sup> |
| <i>INCENP</i>   | 11q12.3               | 45         | 0.084                | -0.13 (0.062)               | 4.0x10 <sup>-02</sup> | -0.13 (0.070)          | 6.4x10 <sup>-02</sup> | -0.13 (0.047)       | 5.6x10 <sup>-03</sup> |
| <i>GLB1</i>     | 3p22.3                | 23         | 0.041                | -0.22 (0.091)               | 1.8x10 <sup>-02</sup> | -0.15 (0.10)           | 1.3x10 <sup>-01</sup> | -0.19 (0.068)       | 5.7x10 <sup>-03</sup> |
| <i>CASP8</i>    | 2q33.1                | 30         | 0.33                 | -0.060 (0.026)              | 2.1x10 <sup>-02</sup> | -0.056 (0.037)         | 1.3x10 <sup>-01</sup> | -0.059 (0.021)      | 5.7x10 <sup>-03</sup> |
| <i>OTUD7B</i>   | 1q21.2                | 9          | 0.017                | 0.43 (0.14)                 | 1.8x10 <sup>-03</sup> | 0.088 (0.17)           | 6.1x10 <sup>-01</sup> | 0.30 (0.11)         | 5.8x10 <sup>-03</sup> |
| <i>SMAD3</i>    | 15q22.33              | 43         | 0.008                | -0.29 (0.097)               | 3.2x10 <sup>-03</sup> | -0.086 (0.13)          | 5.1x10 <sup>-01</sup> | -0.21 (0.078)       | 5.8x10 <sup>-03</sup> |
| <i>AATF</i>     | 17q12                 | 27         | 0.028                | -0.29 (0.11)                | 9.1x10 <sup>-03</sup> | -0.16 (0.14)           | 2.4x10 <sup>-01</sup> | -0.24 (0.087)       | 5.8x10 <sup>-03</sup> |
| <i>ZNF367</i>   | 9q22.32               | 60         | 0.026                | -0.15 (0.070)               | 3.3x10 <sup>-02</sup> | -0.16 (0.089)          | 7.8x10 <sup>-02</sup> | -0.15 (0.055)       | 5.8x10 <sup>-03</sup> |
| <i>WNT10B</i>   | 12q13.12              | 1          | 0.0075               | 0.54 (0.26)                 | 3.6x10 <sup>-02</sup> | 0.57 (0.32)            | 7.4x10 <sup>-02</sup> | 0.56 (0.20)         | 5.9x10 <sup>-03</sup> |
| <i>LRRFIP2</i>  | 3p22.2                | 63         | 0.2                  | 0.093 (0.042)               | 2.7x10 <sup>-02</sup> | 0.075 (0.045)          | 9.8x10 <sup>-02</sup> | 0.084 (0.031)       | 6.0x10 <sup>-03</sup> |
| <i>C22orf32</i> | 22q13.2               | 29         | 0.86                 | -0.039 (0.018)              | 2.6x10 <sup>-02</sup> | -0.034 (0.021)         | 1.1x10 <sup>-01</sup> | -0.037 (0.014)      | 6.5x10 <sup>-03</sup> |

| Gene            | Location <sup>a</sup> | # SNPs in  | Imputation           | Discovery U4C Meta-analysis |                       | UK Biobank Replication |                       | Joint Meta-analysis |                       |
|-----------------|-----------------------|------------|----------------------|-----------------------------|-----------------------|------------------------|-----------------------|---------------------|-----------------------|
|                 |                       | Prediction | Quality <sup>b</sup> | Beta (SE)                   | p-value               | Beta (SE)              | p-value               | Beta (SE)           | p-value               |
| <i>ZNF16</i>    | 8q24.3                | 21         | 0.014                | 0.21 (0.10)                 | 3.6x10 <sup>-02</sup> | 0.25 (0.14)            | 8.2x10 <sup>-02</sup> | 0.22 (0.083)        | 6.5x10 <sup>-03</sup> |
| <i>APH1A</i>    | 1q21.2                | 2          | 0.0058               | 2.80 (1.0)                  | 6.8x10 <sup>-03</sup> | 1.20 (1.2)             | 3.2x10 <sup>-01</sup> | 2.20 (0.80)         | 6.8x10 <sup>-03</sup> |
| <i>STX1A</i>    | 7q11.23               | 18         | 0.031                | -0.23 (0.10)                | 2.8x10 <sup>-02</sup> | -0.19 (0.12)           | 1.1x10 <sup>-01</sup> | -0.21 (0.079)       | 6.8x10 <sup>-03</sup> |
| <i>C12orf32</i> | 12p13.33              | 15         | 0.3                  | -0.061 (0.030)              | 4.2x10 <sup>-02</sup> | -0.078 (0.043)         | 7.0x10 <sup>-02</sup> | -0.067 (0.025)      | 6.8x10 <sup>-03</sup> |
| <i>TTL</i>      | 2q13                  | 25         | 0.033                | 0.20 (0.082)                | 1.8x10 <sup>-02</sup> | 0.15 (0.11)            | 1.8x10 <sup>-01</sup> | 0.18 (0.067)        | 6.9x10 <sup>-03</sup> |
| <i>XCL2</i>     | 1q24.2                | 23         | 0.51                 | -0.053 (0.026)              | 4.4x10 <sup>-02</sup> | -0.051 (0.029)         | 7.3x10 <sup>-02</sup> | -0.052 (0.019)      | 6.9x10 <sup>-03</sup> |
| <i>PF4V1</i>    | 4q13.3                | 37         | 0.58                 | 0.040 (0.020)               | 4.8x10 <sup>-02</sup> | 0.046 (0.025)          | 6.7x10 <sup>-02</sup> | 0.042 (0.016)       | 7.1x10 <sup>-03</sup> |
| <i>IRF2BP2</i>  | 1q42.3                | 77         | 0.048                | -0.13 (0.055)               | 1.5x10 <sup>-02</sup> | -0.087 (0.069)         | 2.1x10 <sup>-01</sup> | -0.12 (0.043)       | 7.2x10 <sup>-03</sup> |
| <i>LGMN</i>     | 14q32.12              | 35         | 0.061                | -0.15 (0.070)               | 3.9x10 <sup>-02</sup> | -0.15 (0.088)          | 8.9x10 <sup>-02</sup> | -0.15 (0.055)       | 7.4x10 <sup>-03</sup> |
| <i>RIOK2</i>    | 5q15                  | 8          | 0.059                | -0.20 (0.075)               | 6.7x10 <sup>-03</sup> | -0.084 (0.098)         | 3.9x10 <sup>-01</sup> | -0.16 (0.060)       | 7.5x10 <sup>-03</sup> |
| <i>FAM200B</i>  | 4p15.32               | 15         | 0.008                | -0.40 (0.16)                | 1.4x10 <sup>-02</sup> | -0.27 (0.23)           | 2.5x10 <sup>-01</sup> | -0.35 (0.13)        | 7.5x10 <sup>-03</sup> |
| <i>TUBGCP4</i>  | 15q15.3               | 21         | 0.092                | 0.12 (0.057)                | 3.7x10 <sup>-02</sup> | 0.11 (0.068)           | 9.4x10 <sup>-02</sup> | 0.12 (0.043)        | 7.6x10 <sup>-03</sup> |
| <i>SOD2</i>     | 6q25.3                | 39         | 0.32                 | 0.11 (0.040)                | 7.8x10 <sup>-03</sup> | 0.043 (0.036)          | 2.3x10 <sup>-01</sup> | 0.071 (0.027)       | 7.7x10 <sup>-03</sup> |
| <i>IRAK3</i>    | 12q14.3               | 47         | 0.13                 | 0.089 (0.037)               | 1.6x10 <sup>-02</sup> | 0.069 (0.059)          | 2.4x10 <sup>-01</sup> | 0.083 (0.031)       | 7.7x10 <sup>-03</sup> |
| <i>SDC2</i>     | 8q22.1                | 46         | 0.054                | 0.19 (0.078)                | 1.7x10 <sup>-02</sup> | 0.12 (0.092)           | 2.0x10 <sup>-01</sup> | 0.16 (0.060)        | 7.7x10 <sup>-03</sup> |
| <i>SYNE2</i>    | 14q23.2               | 45         | 0.036                | -0.14 (0.066)               | 3.3x10 <sup>-02</sup> | -0.16 (0.099)          | 1.1x10 <sup>-01</sup> | -0.15 (0.055)       | 7.8x10 <sup>-03</sup> |
| <i>FAIM</i>     | 3q22.3                | 12         | 0.061                | 0.28 (0.086)                | 1.1x10 <sup>-03</sup> | 0.037 (0.093)          | 6.9x10 <sup>-01</sup> | 0.17 (0.063)        | 7.9x10 <sup>-03</sup> |
| <i>RINT1</i>    | 7q22.3                | 16         | 0.045                | 0.20 (0.085)                | 1.8x10 <sup>-02</sup> | 0.14 (0.12)            | 2.1x10 <sup>-01</sup> | 0.18 (0.068)        | 8.1x10 <sup>-03</sup> |
| <i>S100Z</i>    | 5q13.3                | 32         | 0.16                 | 0.10 (0.045)                | 2.3x10 <sup>-02</sup> | 0.081 (0.059)          | 1.6x10 <sup>-01</sup> | 0.095 (0.036)       | 8.2x10 <sup>-03</sup> |
| <i>YJEFN3</i>   | 19p13.11              | 20         | 0.12                 | -0.12 (0.048)               | 1.5x10 <sup>-02</sup> | -0.071 (0.061)         | 2.4x10 <sup>-01</sup> | -0.10 (0.038)       | 8.3x10 <sup>-03</sup> |
| <i>CASP10</i>   | 2q33.1                | 17         | 0.059                | -0.24 (0.087)               | 6.7x10 <sup>-03</sup> | -0.085 (0.10)          | 4.0x10 <sup>-01</sup> | -0.17 (0.066)       | 9.2x10 <sup>-03</sup> |
| <i>C19orf57</i> | 19p13.12              | 27         | 0.0062               | -0.51 (0.22)                | 1.9x10 <sup>-02</sup> | -0.34 (0.28)           | 2.3x10 <sup>-01</sup> | -0.45 (0.17)        | 9.6x10 <sup>-03</sup> |
| <i>ING5</i>     | 2q37.3                | 17         | 0.0067               | 0.32 (0.14)                 | 2.2x10 <sup>-02</sup> | 0.23 (0.19)            | 2.1x10 <sup>-01</sup> | 0.29 (0.11)         | 9.6x10 <sup>-03</sup> |
| <i>ASL</i>      | 7q11.21               | 19         | 0.28                 | 0.063 (0.030)               | 3.2x10 <sup>-02</sup> | 0.056 (0.038)          | 1.4x10 <sup>-01</sup> | 0.061 (0.023)       | 9.6x10 <sup>-03</sup> |
| <i>NEIL2</i>    | 8p23.1                | 40         | 0.44                 | -0.11 (0.033)               | 1.1x10 <sup>-03</sup> | -0.016 (0.030)         | 6.0x10 <sup>-01</sup> | -0.057 (0.022)      | 9.7x10 <sup>-03</sup> |
| <i>TMEM69</i>   | 1p34.1                | 20         | 0.015                | -0.27 (0.12)                | 3.0x10 <sup>-02</sup> | -0.21 (0.14)           | 1.5x10 <sup>-01</sup> | -0.24 (0.094)       | 9.9x10 <sup>-03</sup> |

| Gene             | Location <sup>a</sup> | # SNPs in  | Imputation           | Discovery U4C Meta-analysis |                       | UK Biobank Replication |                       | Joint Meta-analysis |                       |
|------------------|-----------------------|------------|----------------------|-----------------------------|-----------------------|------------------------|-----------------------|---------------------|-----------------------|
|                  |                       | Prediction | Quality <sup>b</sup> | Beta (SE)                   | p-value               | Beta (SE)              | p-value               | Beta (SE)           | p-value               |
| <i>ARHGAP11A</i> | 15q13.3               | 95         | 0.26                 | 0.12 (0.031)                | 1.8x10 <sup>-04</sup> | -0.019 (0.038)         | 6.1x10 <sup>-01</sup> | 0.062 (0.024)       | 1.0x10 <sup>-02</sup> |
| <i>SNUPN</i>     | 15q24.2               | 24         | 0.37                 | -0.078 (0.029)              | 7.1x10 <sup>-03</sup> | -0.027 (0.033)         | 4.0x10 <sup>-01</sup> | -0.056 (0.022)      | 1.0x10 <sup>-02</sup> |
| <i>ZNF181</i>    | 19q13.11              | 48         | 0.11                 | -0.12 (0.047)               | 1.1x10 <sup>-02</sup> | -0.054 (0.061)         | 3.8x10 <sup>-01</sup> | -0.095 (0.037)      | 1.0x10 <sup>-02</sup> |
| <i>STON2</i>     | 14q31.1               | 13         | 0.0078               | 0.42 (0.18)                 | 2.2x10 <sup>-02</sup> | 0.32 (0.27)            | 2.4x10 <sup>-01</sup> | 0.39 (0.15)         | 1.0x10 <sup>-02</sup> |
| <i>SKIL</i>      | 3q26.2                | 45         | 0.038                | 0.14 (0.064)                | 2.9x10 <sup>-02</sup> | 0.12 (0.087)           | 1.7x10 <sup>-01</sup> | 0.13 (0.052)        | 1.0x10 <sup>-02</sup> |
| <i>TSTA3</i>     | 8q24.3                | 2          | 0.017                | -0.31 (0.15)                | 4.2x10 <sup>-02</sup> | -0.41 (0.26)           | 1.1x10 <sup>-01</sup> | -0.34 (0.13)        | 1.0x10 <sup>-02</sup> |
| <i>WBSCR27</i>   | 7q11.23               | 43         | 0.78                 | 0.044 (0.015)               | 3.3x10 <sup>-03</sup> | 0.005 (0.021)          | 8.1x10 <sup>-01</sup> | 0.031 (0.012)       | 1.1x10 <sup>-02</sup> |
| <i>AP3D1</i>     | 19p13.3               | 34         | 0.083                | -0.14 (0.055)               | 1.1x10 <sup>-02</sup> | -0.062 (0.078)         | 4.3x10 <sup>-01</sup> | -0.11 (0.045)       | 1.1x10 <sup>-02</sup> |
| <i>CDCA4</i>     | 14q32.33              | 4          | 0.15                 | -0.11 (0.043)               | 1.1x10 <sup>-02</sup> | -0.050 (0.061)         | 4.1x10 <sup>-01</sup> | -0.089 (0.035)      | 1.1x10 <sup>-02</sup> |
| <i>ZNF19</i>     | 16q22.2               | 23         | 0.063                | -0.18 (0.073)               | 1.6x10 <sup>-02</sup> | -0.097 (0.086)         | 2.6x10 <sup>-01</sup> | -0.14 (0.056)       | 1.1x10 <sup>-02</sup> |
| <i>SEMA4G</i>    | 10q24.31              | 18         | 0.087                | -0.12 (0.050)               | 2.1x10 <sup>-02</sup> | -0.089 (0.081)         | 2.7x10 <sup>-01</sup> | -0.11 (0.042)       | 1.1x10 <sup>-02</sup> |
| <i>SERF2</i>     | 15q15.3               | 16         | 0.083                | 0.18 (0.081)                | 2.6x10 <sup>-02</sup> | 0.11 (0.080)           | 1.7x10 <sup>-01</sup> | 0.15 (0.057)        | 1.1x10 <sup>-02</sup> |
| <i>RNF187</i>    | 1q42.13               | 56         | 0.14                 | -0.094 (0.044)              | 3.1x10 <sup>-02</sup> | -0.072 (0.051)         | 1.6x10 <sup>-01</sup> | -0.084 (0.033)      | 1.1x10 <sup>-02</sup> |
| <i>TUB</i>       | 11p15.4               | 77         | 0.052                | -0.13 (0.059)               | 3.4x10 <sup>-02</sup> | -0.10 (0.073)          | 1.6x10 <sup>-01</sup> | -0.12 (0.046)       | 1.1x10 <sup>-02</sup> |
| <i>PHLPP1</i>    | 18q21.33              | 34         | 0.15                 | 0.087 (0.042)               | 3.6x10 <sup>-02</sup> | 0.083 (0.056)          | 1.4x10 <sup>-01</sup> | 0.086 (0.034)       | 1.1x10 <sup>-02</sup> |
| <i>HOOK1</i>     | 1p32.1                | 40         | 0.0087               | 0.22 (0.11)                 | 4.7x10 <sup>-02</sup> | 0.22 (0.14)            | 1.1x10 <sup>-01</sup> | 0.22 (0.086)        | 1.1x10 <sup>-02</sup> |
| <i>MYOF</i>      | 10q23.33              | 54         | 0.092                | 0.14 (0.051)                | 5.3x10 <sup>-03</sup> | 0.034 (0.061)          | 5.8x10 <sup>-01</sup> | 0.097 (0.039)       | 1.2x10 <sup>-02</sup> |
| <i>PRKAB2</i>    | 1q21.1                | 36         | 0.1                  | 0.16 (0.063)                | 1.0x10 <sup>-02</sup> | 0.062 (0.065)          | 3.4x10 <sup>-01</sup> | 0.11 (0.045)        | 1.2x10 <sup>-02</sup> |
| <i>GPX3</i>      | 5q33.1                | 45         | 0.14                 | 0.11 (0.046)                | 1.4x10 <sup>-02</sup> | 0.054 (0.056)          | 3.3x10 <sup>-01</sup> | 0.090 (0.036)       | 1.2x10 <sup>-02</sup> |
| <i>C1orf21</i>   | 1q25.3                | 61         | 0.026                | 0.18 (0.073)                | 1.5x10 <sup>-02</sup> | 0.093 (0.098)          | 3.4x10 <sup>-01</sup> | 0.15 (0.059)        | 1.2x10 <sup>-02</sup> |
| <i>RABGAP1</i>   | 9q33.2                | 14         | 0.0058               | 0.38 (0.16)                 | 1.9x10 <sup>-02</sup> | 0.23 (0.22)            | 3.0x10 <sup>-01</sup> | 0.33 (0.13)         | 1.2x10 <sup>-02</sup> |
| <i>PDIA3</i>     | 15q15.3               | 10         | 0.03                 | 0.30 (0.13)                 | 2.2x10 <sup>-02</sup> | 0.17 (0.13)            | 2.0x10 <sup>-01</sup> | 0.24 (0.093)        | 1.2x10 <sup>-02</sup> |
| <i>MDFIC</i>     | 7q31.1                | 19         | 0.0079               | -0.35 (0.16)                | 3.1x10 <sup>-02</sup> | -0.24 (0.18)           | 1.8x10 <sup>-01</sup> | -0.30 (0.12)        | 1.2x10 <sup>-02</sup> |
| <i>ZNF83</i>     | 19q13.41              | 42         | 0.61                 | 0.043 (0.020)               | 3.3x10 <sup>-02</sup> | 0.035 (0.025)          | 1.7x10 <sup>-01</sup> | 0.040 (0.016)       | 1.2x10 <sup>-02</sup> |
| <i>IL24</i>      | 1q32.1                | 16         | 0.16                 | 0.14 (0.049)                | 4.8x10 <sup>-03</sup> | 0.031 (0.054)          | 5.6x10 <sup>-01</sup> | 0.089 (0.036)       | 1.3x10 <sup>-02</sup> |
| <i>RNPEP</i>     | 1q32.1                | 57         | 0.77                 | -0.046 (0.018)              | 9.2x10 <sup>-03</sup> | -0.016 (0.022)         | 4.8x10 <sup>-01</sup> | -0.034 (0.014)      | 1.3x10 <sup>-02</sup> |

| Gene            | Location <sup>a</sup> | # SNPs in  | Imputation           | Discovery U4C Meta-analysis |                       | UK Biobank Replication |                       | Joint Meta-analysis |                       |
|-----------------|-----------------------|------------|----------------------|-----------------------------|-----------------------|------------------------|-----------------------|---------------------|-----------------------|
|                 |                       | Prediction | Quality <sup>b</sup> | Beta (SE)                   | p-value               | Beta (SE)              | p-value               | Beta (SE)           | p-value               |
| <i>KCTD20</i>   | 6p21.31               | 25         | 0.042                | 0.20 (0.077)                | 1.1x10 <sup>-02</sup> | 0.076 (0.11)           | 4.9x10 <sup>-01</sup> | 0.16 (0.063)        | 1.3x10 <sup>-02</sup> |
| <i>CERKL</i>    | 2q31.3                | 59         | 0.32                 | 0.059 (0.024)               | 1.5x10 <sup>-02</sup> | 0.030 (0.035)          | 3.9x10 <sup>-01</sup> | 0.049 (0.020)       | 1.3x10 <sup>-02</sup> |
| <i>PIGN</i>     | 18q21.33              | 65         | 0.35                 | 0.056 (0.026)               | 2.9x10 <sup>-02</sup> | 0.044 (0.036)          | 2.3x10 <sup>-01</sup> | 0.052 (0.021)       | 1.3x10 <sup>-02</sup> |
| <i>ELL3</i>     | 15q15.3               | 7          | 0.035                | 0.23 (0.11)                 | 4.5x10 <sup>-02</sup> | 0.20 (0.13)            | 1.3x10 <sup>-01</sup> | 0.22 (0.087)        | 1.3x10 <sup>-02</sup> |
| <i>PLEKHB1</i>  | 11q13.4               | 43         | 0.14                 | -0.083 (0.042)              | 4.7x10 <sup>-02</sup> | -0.077 (0.052)         | 1.4x10 <sup>-01</sup> | -0.081 (0.033)      | 1.3x10 <sup>-02</sup> |
| <i>NPW</i>      | 16p13.3               | 21         | 0.014                | -0.49 (0.14)                | 5.8x10 <sup>-04</sup> | 0.053 (0.18)           | 7.6x10 <sup>-01</sup> | -0.27 (0.11)        | 1.4x10 <sup>-02</sup> |
| <i>UGP2</i>     | 2p15                  | 12         | 0.0065               | -0.45 (0.14)                | 1.7x10 <sup>-03</sup> | 0.050 (0.21)           | 8.1x10 <sup>-01</sup> | -0.29 (0.12)        | 1.4x10 <sup>-02</sup> |
| <i>CCDC114</i>  | 19q13.33              | 27         | 0.32                 | 0.085 (0.032)               | 7.3x10 <sup>-03</sup> | 0.024 (0.038)          | 5.2x10 <sup>-01</sup> | 0.060 (0.024)       | 1.4x10 <sup>-02</sup> |
| <i>FKBP11</i>   | 12q13.12              | 17         | 0.031                | -0.26 (0.10)                | 9.4x10 <sup>-03</sup> | -0.086 (0.12)          | 4.8x10 <sup>-01</sup> | -0.19 (0.077)       | 1.4x10 <sup>-02</sup> |
| <i>PTPLAD2</i>  | 9p21.3                | 37         | 0.087                | 0.16 (0.062)                | 1.1x10 <sup>-02</sup> | 0.060 (0.074)          | 4.2x10 <sup>-01</sup> | 0.12 (0.048)        | 1.4x10 <sup>-02</sup> |
| <i>PDE9A</i>    | 21q22.3               | 97         | 0.34                 | 0.075 (0.031)               | 1.7x10 <sup>-02</sup> | 0.035 (0.032)          | 2.8x10 <sup>-01</sup> | 0.055 (0.022)       | 1.4x10 <sup>-02</sup> |
| <i>CA6</i>      | 1p36.23               | 42         | 0.33                 | 0.051 (0.023)               | 2.6x10 <sup>-02</sup> | 0.037 (0.035)          | 2.9x10 <sup>-01</sup> | 0.047 (0.019)       | 1.4x10 <sup>-02</sup> |
| <i>BCS1L</i>    | 2q35                  | 8          | 0.0051               | 0.65 (0.29)                 | 2.8x10 <sup>-02</sup> | 0.43 (0.37)            | 2.4x10 <sup>-01</sup> | 0.56 (0.23)         | 1.4x10 <sup>-02</sup> |
| <i>FDXR</i>     | 17q25.1               | 33         | 0.12                 | 0.090 (0.046)               | 4.9x10 <sup>-02</sup> | 0.089 (0.060)          | 1.4x10 <sup>-01</sup> | 0.090 (0.037)       | 1.4x10 <sup>-02</sup> |
| <i>PEX14</i>    | 1p36.22               | 18         | 0.066                | 0.23 (0.082)                | 5.0x10 <sup>-03</sup> | 0.045 (0.092)          | 6.2x10 <sup>-01</sup> | 0.15 (0.061)        | 1.5x10 <sup>-02</sup> |
| <i>FAIM3</i>    | 1q32.1                | 4          | 0.016                | 0.44 (0.17)                 | 9.1x10 <sup>-03</sup> | 0.14 (0.18)            | 4.5x10 <sup>-01</sup> | 0.30 (0.12)         | 1.5x10 <sup>-02</sup> |
| <i>PPP1R13L</i> | 19q13.32              | 33         | 0.044                | -0.21 (0.087)               | 1.4x10 <sup>-02</sup> | -0.086 (0.10)          | 4.0x10 <sup>-01</sup> | -0.16 (0.066)       | 1.5x10 <sup>-02</sup> |
| <i>MXD4</i>     | 4p16.3                | 14         | 0.013                | -0.26 (0.11)                | 2.2x10 <sup>-02</sup> | -0.17 (0.19)           | 3.5x10 <sup>-01</sup> | -0.24 (0.097)       | 1.5x10 <sup>-02</sup> |
| <i>HIAT1</i>    | 1p21.2                | 3          | 0.0054               | -0.71 (0.34)                | 3.8x10 <sup>-02</sup> | -0.43 (0.30)           | 1.6x10 <sup>-01</sup> | -0.55 (0.23)        | 1.5x10 <sup>-02</sup> |
| <i>BAG3</i>     | 10q26.11              | 18         | 0.0051               | -0.71 (0.20)                | 4.9x10 <sup>-04</sup> | 0.22 (0.29)            | 4.4x10 <sup>-01</sup> | -0.40 (0.17)        | 1.6x10 <sup>-02</sup> |
| <i>ZNF860</i>   | 3p23                  | 10         | 0.016                | 0.33 (0.13)                 | 9.9x10 <sup>-03</sup> | 0.085 (0.21)           | 6.8x10 <sup>-01</sup> | 0.26 (0.11)         | 1.6x10 <sup>-02</sup> |
| <i>TANC2</i>    | 17q23.2               | 31         | 0.2                  | 0.089 (0.040)               | 2.5x10 <sup>-02</sup> | 0.048 (0.044)          | 2.7x10 <sup>-01</sup> | 0.071 (0.029)       | 1.6x10 <sup>-02</sup> |
| <i>RTDR1</i>    | 22q11.22              | 19         | 0.053                | 0.16 (0.074)                | 2.8x10 <sup>-02</sup> | 0.11 (0.100)           | 2.7x10 <sup>-01</sup> | 0.14 (0.060)        | 1.6x10 <sup>-02</sup> |
| <i>AKNA</i>     | 9q32                  | 9          | 0.074                | -0.19 (0.088)               | 3.3x10 <sup>-02</sup> | -0.13 (0.10)           | 2.3x10 <sup>-01</sup> | -0.16 (0.068)       | 1.6x10 <sup>-02</sup> |
| <i>PTPRJ</i>    | 11p11.2               | 34         | 0.16                 | 0.080 (0.038)               | 3.6x10 <sup>-02</sup> | 0.063 (0.052)          | 2.2x10 <sup>-01</sup> | 0.074 (0.031)       | 1.6x10 <sup>-02</sup> |
| <i>ZNF576</i>   | 19q13.31              | 37         | 0.052                | -0.24 (0.068)               | 4.5x10 <sup>-04</sup> | 0.056 (0.088)          | 5.3x10 <sup>-01</sup> | -0.13 (0.054)       | 1.7x10 <sup>-02</sup> |
| <i>SYDE2</i>    | 1p22.3                | 11         | 0.018                | -0.34 (0.13)                | 8.6x10 <sup>-03</sup> | -0.083 (0.17)          | 6.2x10 <sup>-01</sup> | -0.24 (0.10)        | 1.7x10 <sup>-02</sup> |

| Gene            | Location <sup>a</sup> | # SNPs in  | Imputation           | Discovery U4C Meta-analysis |                       | UK Biobank Replication |                       | Joint Meta-analysis |                       |
|-----------------|-----------------------|------------|----------------------|-----------------------------|-----------------------|------------------------|-----------------------|---------------------|-----------------------|
|                 |                       | Prediction | Quality <sup>b</sup> | Beta (SE)                   | p-value               | Beta (SE)              | p-value               | Beta (SE)           | p-value               |
| <i>QDPR</i>     | 4p15.32               | 6          | 0.65                 | -0.050 (0.020)              | 1.2x10 <sup>-02</sup> | -0.017 (0.025)         | 4.9x10 <sup>-01</sup> | -0.037 (0.016)      | 1.7x10 <sup>-02</sup> |
| <i>STK16</i>    | 2q35                  | 27         | 0.0097               | 0.32 (0.13)                 | 1.8x10 <sup>-02</sup> | 0.15 (0.17)            | 3.9x10 <sup>-01</sup> | 0.25 (0.11)         | 1.7x10 <sup>-02</sup> |
| <i>PHOSPHO2</i> | 2q31.1                | 31         | 0.12                 | -0.10 (0.047)               | 3.3x10 <sup>-02</sup> | -0.069 (0.060)         | 2.5x10 <sup>-01</sup> | -0.089 (0.037)      | 1.7x10 <sup>-02</sup> |
| <i>ARRDC2</i>   | 19p13.11              | 20         | 0.034                | -0.21 (0.100)               | 3.7x10 <sup>-02</sup> | -0.18 (0.15)           | 2.4x10 <sup>-01</sup> | -0.20 (0.083)       | 1.7x10 <sup>-02</sup> |
| <i>NDUFA7</i>   | 19p13.2               | 34         | 0.095                | -0.13 (0.063)               | 4.2x10 <sup>-02</sup> | -0.091 (0.069)         | 1.9x10 <sup>-01</sup> | -0.11 (0.047)       | 1.7x10 <sup>-02</sup> |
| <i>GPR19</i>    | 12p13.1               | 8          | 0.26                 | -0.12 (0.041)               | 3.2x10 <sup>-03</sup> | -0.014 (0.044)         | 7.6x10 <sup>-01</sup> | -0.071 (0.030)      | 1.8x10 <sup>-02</sup> |
| <i>MCM9</i>     | 6q22.31               | 76         | 0.094                | 0.11 (0.047)                | 2.2x10 <sup>-02</sup> | 0.052 (0.053)          | 3.3x10 <sup>-01</sup> | 0.084 (0.035)       | 1.8x10 <sup>-02</sup> |
| <i>NOL9</i>     | 1p36.31               | 19         | 0.081                | 0.096 (0.048)               | 4.5x10 <sup>-02</sup> | 0.12 (0.095)           | 2.0x10 <sup>-01</sup> | 0.10 (0.043)        | 1.8x10 <sup>-02</sup> |
| <i>IDH1</i>     | 2q34                  | 6          | 0.011                | 0.59 (0.20)                 | 3.1x10 <sup>-03</sup> | 0.034 (0.23)           | 8.8x10 <sup>-01</sup> | 0.35 (0.15)         | 1.9x10 <sup>-02</sup> |
| <i>PMFBP1</i>   | 16q22.2               | 39         | 0.012                | -0.21 (0.082)               | 1.1x10 <sup>-02</sup> | -0.051 (0.12)          | 6.6x10 <sup>-01</sup> | -0.16 (0.067)       | 1.9x10 <sup>-02</sup> |
| <i>TRIM16</i>   | 17p12                 | 32         | 0.21                 | -0.095 (0.037)              | 1.1x10 <sup>-02</sup> | -0.027 (0.046)         | 5.6x10 <sup>-01</sup> | -0.068 (0.029)      | 1.9x10 <sup>-02</sup> |
| <i>ARID5B</i>   | 10q21.2               | 29         | 0.11                 | 0.14 (0.061)                | 2.5x10 <sup>-02</sup> | 0.069 (0.068)          | 3.1x10 <sup>-01</sup> | 0.11 (0.045)        | 1.9x10 <sup>-02</sup> |
| <i>QSOX1</i>    | 1q25.2                | 55         | 0.45                 | -0.043 (0.021)              | 4.4x10 <sup>-02</sup> | -0.035 (0.029)         | 2.2x10 <sup>-01</sup> | -0.040 (0.017)      | 1.9x10 <sup>-02</sup> |
| <i>SYNPO2</i>   | 4q26                  | 30         | 0.2                  | 0.11 (0.040)                | 4.4x10 <sup>-03</sup> | 0.012 (0.046)          | 7.9x10 <sup>-01</sup> | 0.070 (0.030)       | 2.0x10 <sup>-02</sup> |
| <i>TAP2</i>     | 6p21.32               | 56         | 0.56                 | 0.054 (0.023)               | 1.9x10 <sup>-02</sup> | 0.023 (0.029)          | 4.3x10 <sup>-01</sup> | 0.042 (0.018)       | 2.0x10 <sup>-02</sup> |
| <i>POLR3G</i>   | 5q14.3                | 19         | 0.16                 | -0.11 (0.047)               | 2.2x10 <sup>-02</sup> | -0.049 (0.054)         | 3.7x10 <sup>-01</sup> | -0.083 (0.036)      | 2.0x10 <sup>-02</sup> |
| <i>ABCC10</i>   | 6p21.1                | 22         | 0.054                | -0.19 (0.091)               | 3.2x10 <sup>-02</sup> | -0.12 (0.11)           | 2.8x10 <sup>-01</sup> | -0.16 (0.069)       | 2.0x10 <sup>-02</sup> |
| <i>CCDC53</i>   | 12q23.2               | 26         | 0.35                 | 0.050 (0.025)               | 4.4x10 <sup>-02</sup> | 0.041 (0.035)          | 2.4x10 <sup>-01</sup> | 0.047 (0.020)       | 2.0x10 <sup>-02</sup> |
| <i>TRAF3IP2</i> | 6q21                  | 22         | 0.12                 | 0.088 (0.045)               | 4.8x10 <sup>-02</sup> | 0.071 (0.058)          | 2.2x10 <sup>-01</sup> | 0.082 (0.035)       | 2.0x10 <sup>-02</sup> |
| <i>MS4A14</i>   | 11q12.2               | 33         | 0.23                 | 0.10 (0.036)                | 4.6x10 <sup>-03</sup> | 0.009 (0.043)          | 8.3x10 <sup>-01</sup> | 0.064 (0.028)       | 2.1x10 <sup>-02</sup> |
| <i>ZNF165</i>   | 6p22.1                | 21         | 0.039                | -0.20 (0.078)               | 8.3x10 <sup>-03</sup> | -0.033 (0.11)          | 7.5x10 <sup>-01</sup> | -0.14 (0.062)       | 2.1x10 <sup>-02</sup> |
| <i>XBP1</i>     | 22q12.1               | 39         | 0.25                 | 0.082 (0.032)               | 1.2x10 <sup>-02</sup> | 0.021 (0.042)          | 6.1x10 <sup>-01</sup> | 0.059 (0.026)       | 2.1x10 <sup>-02</sup> |
| <i>SLC5A11</i>  | 16p12.1               | 34         | 0.75                 | -0.051 (0.021)              | 1.5x10 <sup>-02</sup> | -0.017 (0.023)         | 4.6x10 <sup>-01</sup> | -0.036 (0.016)      | 2.1x10 <sup>-02</sup> |
| <i>FAM114A1</i> | 4p14                  | 26         | 0.077                | 0.17 (0.071)                | 1.6x10 <sup>-02</sup> | 0.061 (0.087)          | 4.8x10 <sup>-01</sup> | 0.13 (0.055)        | 2.1x10 <sup>-02</sup> |
| <i>NDUFA10</i>  | 2q37.3                | 46         | 0.52                 | 0.053 (0.023)               | 2.1x10 <sup>-02</sup> | 0.023 (0.028)          | 4.1x10 <sup>-01</sup> | 0.041 (0.018)       | 2.1x10 <sup>-02</sup> |
| <i>BLMH</i>     | 17q11.2               | 44         | 0.14                 | 0.092 (0.041)               | 2.4x10 <sup>-02</sup> | 0.043 (0.048)          | 3.7x10 <sup>-01</sup> | 0.071 (0.031)       | 2.1x10 <sup>-02</sup> |
| <i>PDS5B</i>    | 13q13.1               | 33         | 0.017                | -0.26 (0.12)                | 2.7x10 <sup>-02</sup> | -0.14 (0.15)           | 3.6x10 <sup>-01</sup> | -0.21 (0.092)       | 2.1x10 <sup>-02</sup> |

| Gene            | Location <sup>a</sup> | # SNPs in  | Imputation           | Discovery U4C Meta-analysis |                       | UK Biobank Replication |                       | Joint Meta-analysis |                       |
|-----------------|-----------------------|------------|----------------------|-----------------------------|-----------------------|------------------------|-----------------------|---------------------|-----------------------|
|                 |                       | Prediction | Quality <sup>b</sup> | Beta (SE)                   | p-value               | Beta (SE)              | p-value               | Beta (SE)           | p-value               |
| <i>DFFA</i>     | 1p36.22               | 6          | 0.0067               | 0.50 (0.23)                 | 3.1x10 <sup>-02</sup> | 0.29 (0.29)            | 3.1x10 <sup>-01</sup> | 0.42 (0.18)         | 2.1x10 <sup>-02</sup> |
| <i>CCDC132</i>  | 7q21.3                | 7          | 0.022                | -0.32 (0.16)                | 4.4x10 <sup>-02</sup> | -0.22 (0.18)           | 2.4x10 <sup>-01</sup> | -0.28 (0.12)        | 2.1x10 <sup>-02</sup> |
| <i>NUP210</i>   | 3p25.1                | 17         | 0.033                | -0.27 (0.10)                | 1.0x10 <sup>-02</sup> | -0.056 (0.13)          | 6.8x10 <sup>-01</sup> | -0.19 (0.082)       | 2.2x10 <sup>-02</sup> |
| <i>FKBP7</i>    | 2q31.2                | 28         | 0.034                | 0.24 (0.074)                | 1.2x10 <sup>-03</sup> | -0.068 (0.10)          | 5.2x10 <sup>-01</sup> | 0.14 (0.061)        | 2.3x10 <sup>-02</sup> |
| <i>NSMCE1</i>   | 16p12.1               | 26         | 0.067                | -0.19 (0.076)               | 1.3x10 <sup>-02</sup> | -0.054 (0.090)         | 5.5x10 <sup>-01</sup> | -0.13 (0.058)       | 2.3x10 <sup>-02</sup> |
| <i>MRPL43</i>   | 10q24.31              | 17         | 0.41                 | -0.049 (0.022)              | 2.3x10 <sup>-02</sup> | -0.023 (0.033)         | 4.9x10 <sup>-01</sup> | -0.041 (0.018)      | 2.3x10 <sup>-02</sup> |
| <i>LZTS1</i>    | 8p21.3                | 56         | 0.15                 | -0.079 (0.038)              | 3.6x10 <sup>-02</sup> | -0.052 (0.054)         | 3.4x10 <sup>-01</sup> | -0.070 (0.031)      | 2.3x10 <sup>-02</sup> |
| <i>SOCS6</i>    | 18q22.2               | 8          | 0.0066               | -0.40 (0.20)                | 4.6x10 <sup>-02</sup> | -0.31 (0.27)           | 2.6x10 <sup>-01</sup> | -0.37 (0.16)        | 2.3x10 <sup>-02</sup> |
| <i>ZNF707</i>   | 8q24.3                | 16         | 0.11                 | 0.085 (0.043)               | 4.9x10 <sup>-02</sup> | 0.075 (0.066)          | 2.5x10 <sup>-01</sup> | 0.082 (0.036)       | 2.3x10 <sup>-02</sup> |
| <i>CRYM</i>     | 16p12.2               | 40         | 0.12                 | -0.12 (0.054)               | 2.6x10 <sup>-02</sup> | -0.053 (0.056)         | 3.4x10 <sup>-01</sup> | -0.088 (0.039)      | 2.4x10 <sup>-02</sup> |
| <i>CNOT6L</i>   | 4q21.1                | 13         | 0.0061               | -0.42 (0.16)                | 1.2x10 <sup>-02</sup> | -0.056 (0.25)          | 8.3x10 <sup>-01</sup> | -0.31 (0.14)        | 2.5x10 <sup>-02</sup> |
| <i>C10orf2</i>  | 10q24.31              | 16         | 0.022                | 0.31 (0.12)                 | 1.2x10 <sup>-02</sup> | 0.062 (0.16)           | 6.9x10 <sup>-01</sup> | 0.22 (0.097)        | 2.5x10 <sup>-02</sup> |
| <i>MSLN</i>     | 16p13.3               | 137        | 0.37                 | -0.060 (0.026)              | 2.1x10 <sup>-02</sup> | -0.023 (0.032)         | 4.7x10 <sup>-01</sup> | -0.045 (0.020)      | 2.5x10 <sup>-02</sup> |
| <i>TMEM62</i>   | 15q15.2               | 6          | 0.014                | 0.33 (0.16)                 | 4.0x10 <sup>-02</sup> | 0.20 (0.20)            | 3.1x10 <sup>-01</sup> | 0.28 (0.12)         | 2.5x10 <sup>-02</sup> |
| <i>SRGAP2</i>   | 1q32.1                | 61         | 0.012                | 0.17 (0.064)                | 6.2x10 <sup>-03</sup> | 0.000 (0.090)          | 1.00E+00              | 0.12 (0.052)        | 2.6x10 <sup>-02</sup> |
| <i>ALCAM</i>    | 3q13.11               | 77         | 0.28                 | 0.064 (0.025)               | 1.1x10 <sup>-02</sup> | 0.009 (0.036)          | 8.1x10 <sup>-01</sup> | 0.046 (0.021)       | 2.6x10 <sup>-02</sup> |
| <i>PCBP3</i>    | 21q22.3               | 73         | 0.39                 | 0.060 (0.027)               | 2.3x10 <sup>-02</sup> | 0.024 (0.031)          | 4.5x10 <sup>-01</sup> | 0.045 (0.020)       | 2.6x10 <sup>-02</sup> |
| <i>RPL7L1</i>   | 6p21.1                | 16         | 0.09                 | 0.15 (0.070)                | 3.1x10 <sup>-02</sup> | 0.072 (0.075)          | 3.4x10 <sup>-01</sup> | 0.11 (0.051)        | 2.6x10 <sup>-02</sup> |
| <i>UNG</i>      | 12q24.11              | 4          | 0.23                 | -0.075 (0.037)              | 4.5x10 <sup>-02</sup> | -0.050 (0.048)         | 2.9x10 <sup>-01</sup> | -0.065 (0.029)      | 2.6x10 <sup>-02</sup> |
| <i>CNKSR3</i>   | 6q25.2                | 28         | 0.17                 | -0.11 (0.043)               | 7.4x10 <sup>-03</sup> | -0.009 (0.054)         | 8.7x10 <sup>-01</sup> | -0.074 (0.034)      | 2.7x10 <sup>-02</sup> |
| <i>SAT2</i>     | 17p13.1               | 32         | 0.24                 | 0.10 (0.040)                | 1.2x10 <sup>-02</sup> | 0.023 (0.042)          | 5.9x10 <sup>-01</sup> | 0.064 (0.029)       | 2.7x10 <sup>-02</sup> |
| <i>ITGA7</i>    | 12q13.2               | 43         | 0.1                  | -0.11 (0.049)               | 3.1x10 <sup>-02</sup> | -0.053 (0.066)         | 4.2x10 <sup>-01</sup> | -0.087 (0.039)      | 2.7x10 <sup>-02</sup> |
| <i>CCND1</i>    | 11q13.3               | 29         | 0.083                | 0.15 (0.072)                | 3.7x10 <sup>-02</sup> | 0.077 (0.077)          | 3.2x10 <sup>-01</sup> | 0.12 (0.053)        | 2.7x10 <sup>-02</sup> |
| <i>ARL4A</i>    | 7p21.3                | 47         | 0.06                 | -0.20 (0.073)               | 5.3x10 <sup>-03</sup> | -0.014 (0.082)         | 8.7x10 <sup>-01</sup> | -0.12 (0.055)       | 2.8x10 <sup>-02</sup> |
| <i>SHISA4</i>   | 1q32.1                | 33         | 0.045                | 0.22 (0.099)                | 2.9x10 <sup>-02</sup> | 0.094 (0.11)           | 4.0x10 <sup>-01</sup> | 0.16 (0.075)        | 2.8x10 <sup>-02</sup> |
| <i>PDCD11</i>   | 10q24.33              | 42         | 0.034                | -0.20 (0.071)               | 5.7x10 <sup>-03</sup> | -0.004 (0.089)         | 9.7x10 <sup>-01</sup> | -0.12 (0.056)       | 2.9x10 <sup>-02</sup> |
| <i>TMEM170B</i> | 6p24.2                | 41         | 0.045                | 0.18 (0.084)                | 3.7x10 <sup>-02</sup> | 0.091 (0.10)           | 3.8x10 <sup>-01</sup> | 0.14 (0.066)        | 2.9x10 <sup>-02</sup> |

| Gene            | Location <sup>a</sup> | # SNPs in  | Imputation           | Discovery U4C Meta-analysis |                       | UK Biobank Replication |                       | Joint Meta-analysis |                       |
|-----------------|-----------------------|------------|----------------------|-----------------------------|-----------------------|------------------------|-----------------------|---------------------|-----------------------|
|                 |                       | Prediction | Quality <sup>b</sup> | Beta (SE)                   | p-value               | Beta (SE)              | p-value               | Beta (SE)           | p-value               |
| <i>TDG</i>      | 12q23.3               | 19         | 0.0082               | -0.36 (0.15)                | 1.9x10 <sup>-02</sup> | -0.11 (0.17)           | 5.4x10 <sup>-01</sup> | -0.25 (0.11)        | 3.0x10 <sup>-02</sup> |
| <i>RNF157</i>   | 17q25.1               | 21         | 0.094                | 0.14 (0.059)                | 2.1x10 <sup>-02</sup> | 0.045 (0.074)          | 5.5x10 <sup>-01</sup> | 0.10 (0.046)        | 3.0x10 <sup>-02</sup> |
| <i>DCBLD2</i>   | 3q12.1                | 32         | 0.17                 | 0.090 (0.044)               | 4.0x10 <sup>-02</sup> | 0.049 (0.054)          | 3.6x10 <sup>-01</sup> | 0.074 (0.034)       | 3.0x10 <sup>-02</sup> |
| <i>SCUBE2</i>   | 11p15.4               | 25         | 0.035                | -0.15 (0.078)               | 4.9x10 <sup>-02</sup> | -0.10 (0.11)           | 3.3x10 <sup>-01</sup> | -0.14 (0.063)       | 3.0x10 <sup>-02</sup> |
| <i>PLD6</i>     | 17p11.2               | 34         | 0.25                 | -0.054 (0.021)              | 1.0x10 <sup>-02</sup> | 0.011 (0.041)          | 7.9x10 <sup>-01</sup> | -0.040 (0.019)      | 3.1x10 <sup>-02</sup> |
| <i>FARS2</i>    | 6p25.1                | 60         | 0.17                 | -0.089 (0.035)              | 1.1x10 <sup>-02</sup> | -0.007 (0.047)         | 8.8x10 <sup>-01</sup> | -0.060 (0.028)      | 3.1x10 <sup>-02</sup> |
| <i>HBE1</i>     | 11p15.4               | 8          | 0.016                | -0.32 (0.14)                | 2.2x10 <sup>-02</sup> | -0.088 (0.22)          | 6.9x10 <sup>-01</sup> | -0.25 (0.12)        | 3.1x10 <sup>-02</sup> |
| <i>ABCG1</i>    | 21q22.3               | 33         | 0.0048               | 0.34 (0.16)                 | 3.8x10 <sup>-02</sup> | 0.18 (0.22)            | 4.2x10 <sup>-01</sup> | 0.28 (0.13)         | 3.1x10 <sup>-02</sup> |
| <i>IRGQ</i>     | 19q13.31              | 22         | 0.052                | -0.21 (0.072)               | 3.0x10 <sup>-03</sup> | 0.028 (0.091)          | 7.6x10 <sup>-01</sup> | -0.12 (0.057)       | 3.2x10 <sup>-02</sup> |
| <i>MAP1LC3A</i> | 20q11.22              | 49         | 0.27                 | -0.088 (0.031)              | 4.7x10 <sup>-03</sup> | -0.002 (0.035)         | 9.6x10 <sup>-01</sup> | -0.050 (0.023)      | 3.2x10 <sup>-02</sup> |
| <i>AHNAK</i>    | 11q12.3               | 57         | 0.038                | 0.19 (0.076)                | 1.0x10 <sup>-02</sup> | 0.027 (0.090)          | 7.6x10 <sup>-01</sup> | 0.12 (0.058)        | 3.2x10 <sup>-02</sup> |
| <i>ATE1</i>     | 10q26.13              | 4          | 0.011                | -0.52 (0.25)                | 3.4x10 <sup>-02</sup> | -0.22 (0.24)           | 3.6x10 <sup>-01</sup> | -0.37 (0.17)        | 3.2x10 <sup>-02</sup> |
| <i>TAF11</i>    | 6p21.31               | 29         | 0.0077               | -0.20 (0.098)               | 3.7x10 <sup>-02</sup> | -0.11 (0.14)           | 4.4x10 <sup>-01</sup> | -0.17 (0.080)       | 3.2x10 <sup>-02</sup> |
| <i>AGPHD1</i>   | 15q25.1               | 12         | 0.017                | -0.31 (0.15)                | 3.7x10 <sup>-02</sup> | -0.14 (0.16)           | 3.6x10 <sup>-01</sup> | -0.23 (0.11)        | 3.2x10 <sup>-02</sup> |
| <i>KISS1R</i>   | 19p13.3               | 14         | 0.22                 | 0.098 (0.049)               | 4.8x10 <sup>-02</sup> | 0.051 (0.047)          | 2.8x10 <sup>-01</sup> | 0.073 (0.034)       | 3.2x10 <sup>-02</sup> |
| <i>PAK1</i>     | 11q14.1               | 35         | 0.058                | 0.26 (0.093)                | 4.5x10 <sup>-03</sup> | 0.018 (0.091)          | 8.4x10 <sup>-01</sup> | 0.14 (0.065)        | 3.3x10 <sup>-02</sup> |
| <i>RSPH9</i>    | 6p21.1                | 50         | 0.009                | 0.28 (0.11)                 | 8.6x10 <sup>-03</sup> | 0.011 (0.14)           | 9.3x10 <sup>-01</sup> | 0.18 (0.084)        | 3.3x10 <sup>-02</sup> |
| <i>IFI16</i>    | 1q23.1                | 14         | 0.019                | 0.30 (0.12)                 | 1.1x10 <sup>-02</sup> | 0.000 (0.19)           | 1.00E+00              | 0.21 (0.10)         | 3.3x10 <sup>-02</sup> |
| <i>CSDA</i>     | 17p13.1               | 64         | 0.033                | 0.14 (0.061)                | 2.2x10 <sup>-02</sup> | 0.039 (0.090)          | 6.7x10 <sup>-01</sup> | 0.11 (0.051)        | 3.3x10 <sup>-02</sup> |
| <i>PDZD8</i>    | 10q26.11              | 64         | 0.44                 | -0.060 (0.027)              | 2.7x10 <sup>-02</sup> | -0.022 (0.030)         | 4.6x10 <sup>-01</sup> | -0.043 (0.020)      | 3.3x10 <sup>-02</sup> |
| <i>LSR</i>      | 19q13.12              | 18         | 0.17                 | 0.10 (0.046)                | 2.8x10 <sup>-02</sup> | 0.039 (0.056)          | 4.9x10 <sup>-01</sup> | 0.076 (0.036)       | 3.3x10 <sup>-02</sup> |
| <i>C2</i>       | 6p21.33               | 45         | 0.085                | -0.21 (0.068)               | 1.9x10 <sup>-03</sup> | -0.002 (0.062)         | 9.7x10 <sup>-01</sup> | -0.097 (0.046)      | 3.4x10 <sup>-02</sup> |
| <i>B3GALTL</i>  | 13q12.3               | 53         | 0.034                | 0.20 (0.075)                | 6.7x10 <sup>-03</sup> | -0.024 (0.11)          | 8.3x10 <sup>-01</sup> | 0.13 (0.062)        | 3.4x10 <sup>-02</sup> |
| <i>BIK</i>      | 22q13.2               | 40         | 0.068                | 0.20 (0.075)                | 7.7x10 <sup>-03</sup> | 0.010 (0.090)          | 9.2x10 <sup>-01</sup> | 0.12 (0.058)        | 3.4x10 <sup>-02</sup> |
| <i>OCIAD2</i>   | 4p11                  | 1          | 0.0064               | -0.59 (0.23)                | 1.0x10 <sup>-02</sup> | 0.097 (0.41)           | 8.1x10 <sup>-01</sup> | -0.42 (0.20)        | 3.4x10 <sup>-02</sup> |
| <i>ZDHHC5</i>   | 11q12.1               | 16         | 0.084                | 0.17 (0.073)                | 2.0x10 <sup>-02</sup> | 0.048 (0.081)          | 5.5x10 <sup>-01</sup> | 0.12 (0.054)        | 3.4x10 <sup>-02</sup> |
| <i>IDO1</i>     | 8p11.21               | 37         | 0.13                 | -0.093 (0.045)              | 3.8x10 <sup>-02</sup> | -0.046 (0.059)         | 4.4x10 <sup>-01</sup> | -0.076 (0.036)      | 3.4x10 <sup>-02</sup> |

| Gene            | Location <sup>a</sup> | # SNPs in  | Imputation           | Discovery U4C Meta-analysis |                       | UK Biobank Replication |                       | Joint Meta-analysis |                       |
|-----------------|-----------------------|------------|----------------------|-----------------------------|-----------------------|------------------------|-----------------------|---------------------|-----------------------|
|                 |                       | Prediction | Quality <sup>b</sup> | Beta (SE)                   | p-value               | Beta (SE)              | p-value               | Beta (SE)           | p-value               |
| <i>CDKN1A</i>   | 6p21.2                | 44         | 0.052                | 0.16 (0.065)                | 1.3x10 <sup>-02</sup> | 0.020 (0.082)          | 8.1x10 <sup>-01</sup> | 0.11 (0.051)        | 3.5x10 <sup>-02</sup> |
| <i>UBE2E1</i>   | 3p24.3                | 31         | 0.0064               | 0.23 (0.11)                 | 3.6x10 <sup>-02</sup> | 0.10 (0.15)            | 4.8x10 <sup>-01</sup> | 0.18 (0.087)        | 3.5x10 <sup>-02</sup> |
| <i>ACSL5</i>    | 10q25.2               | 21         | 0.38                 | 0.052 (0.026)               | 4.4x10 <sup>-02</sup> | 0.029 (0.034)          | 4.0x10 <sup>-01</sup> | 0.044 (0.021)       | 3.5x10 <sup>-02</sup> |
| <i>TRPV5</i>    | 7q34                  | 32         | 0.22                 | -0.11 (0.043)               | 1.0x10 <sup>-02</sup> | -0.016 (0.044)         | 7.2x10 <sup>-01</sup> | -0.065 (0.031)      | 3.6x10 <sup>-02</sup> |
| <i>CASC1</i>    | 12p12.1               | 33         | 0.23                 | 0.094 (0.038)               | 1.2x10 <sup>-02</sup> | 0.011 (0.047)          | 8.1x10 <sup>-01</sup> | 0.061 (0.029)       | 3.6x10 <sup>-02</sup> |
| <i>AFMID</i>    | 17q25.3               | 3          | 0.035                | 0.26 (0.098)                | 7.7x10 <sup>-03</sup> | -0.031 (0.15)          | 8.3x10 <sup>-01</sup> | 0.17 (0.081)        | 3.7x10 <sup>-02</sup> |
| <i>CD44</i>     | 11p13                 | 8          | 0.049                | 0.29 (0.12)                 | 1.1x10 <sup>-02</sup> | 0.031 (0.14)           | 8.2x10 <sup>-01</sup> | 0.18 (0.088)        | 3.7x10 <sup>-02</sup> |
| <i>TMEM184B</i> | 22q13.1               | 19         | 0.15                 | 0.12 (0.050)                | 2.1x10 <sup>-02</sup> | 0.029 (0.060)          | 6.2x10 <sup>-01</sup> | 0.080 (0.038)       | 3.7x10 <sup>-02</sup> |
| <i>CHPF2</i>    | 7q36.1                | 45         | 0.07                 | 0.13 (0.064)                | 3.6x10 <sup>-02</sup> | 0.057 (0.074)          | 4.4x10 <sup>-01</sup> | 0.10 (0.048)        | 3.7x10 <sup>-02</sup> |
| <i>PLAT</i>     | 8p11.21               | 8          | 0.067                | -0.14 (0.072)               | 4.6x10 <sup>-02</sup> | -0.079 (0.097)         | 4.2x10 <sup>-01</sup> | -0.12 (0.058)       | 3.7x10 <sup>-02</sup> |
| <i>NOG</i>      | 17q22                 | 36         | 0.069                | 0.18 (0.073)                | 1.3x10 <sup>-02</sup> | 0.029 (0.082)          | 7.2x10 <sup>-01</sup> | 0.11 (0.054)        | 3.8x10 <sup>-02</sup> |
| <i>ANKRD26</i>  | 10p12.1               | 89         | 0.077                | 0.096 (0.044)               | 2.9x10 <sup>-02</sup> | 0.032 (0.062)          | 6.1x10 <sup>-01</sup> | 0.074 (0.036)       | 3.8x10 <sup>-02</sup> |
| <i>CYB561</i>   | 17q23.3               | 11         | 0.014                | -0.34 (0.17)                | 4.9x10 <sup>-02</sup> | -0.18 (0.20)           | 3.7x10 <sup>-01</sup> | -0.28 (0.13)        | 3.8x10 <sup>-02</sup> |
| <i>WDR37</i>    | 10p15.3               | 9          | 0.033                | -0.28 (0.10)                | 5.9x10 <sup>-03</sup> | 0.075 (0.16)           | 6.4x10 <sup>-01</sup> | -0.18 (0.086)       | 3.9x10 <sup>-02</sup> |
| <i>ISOC1</i>    | 5q23.3                | 42         | 0.32                 | 0.061 (0.027)               | 2.2x10 <sup>-02</sup> | 0.013 (0.036)          | 7.1x10 <sup>-01</sup> | 0.044 (0.022)       | 3.9x10 <sup>-02</sup> |
| <i>RNF216</i>   | 7p22.1                | 41         | 0.059                | -0.12 (0.054)               | 2.6x10 <sup>-02</sup> | -0.035 (0.074)         | 6.4x10 <sup>-01</sup> | -0.091 (0.044)      | 3.9x10 <sup>-02</sup> |
| <i>CASC3</i>    | 17q21.1               | 36         | 0.024                | -0.12 (0.058)               | 4.0x10 <sup>-02</sup> | -0.057 (0.096)         | 5.5x10 <sup>-01</sup> | -0.10 (0.050)       | 3.9x10 <sup>-02</sup> |
| <i>TNS4</i>     | 17q21.2               | 6          | 0.031                | 0.27 (0.13)                 | 4.3x10 <sup>-02</sup> | 0.12 (0.15)            | 4.1x10 <sup>-01</sup> | 0.21 (0.099)        | 3.9x10 <sup>-02</sup> |
| <i>CCDC126</i>  | 7p15.3                | 13         | 0.16                 | 0.11 (0.057)                | 4.9x10 <sup>-02</sup> | 0.054 (0.055)          | 3.3x10 <sup>-01</sup> | 0.082 (0.040)       | 3.9x10 <sup>-02</sup> |
| <i>TPBG</i>     | 6q14.1                | 73         | 0.098                | -0.098 (0.043)              | 2.2x10 <sup>-02</sup> | -0.022 (0.056)         | 7.0x10 <sup>-01</sup> | -0.070 (0.034)      | 4.0x10 <sup>-02</sup> |
| <i>THNSL1</i>   | 10p12.1               | 40         | 0.031                | 0.17 (0.086)                | 4.6x10 <sup>-02</sup> | 0.086 (0.11)           | 4.3x10 <sup>-01</sup> | 0.14 (0.068)        | 4.0x10 <sup>-02</sup> |
| <i>MCCC1</i>    | 3q27.1                | 37         | 0.12                 | 0.11 (0.041)                | 1.1x10 <sup>-02</sup> | -0.005 (0.059)         | 9.4x10 <sup>-01</sup> | 0.069 (0.034)       | 4.1x10 <sup>-02</sup> |
| <i>TMED6</i>    | 16q22.1               | 25         | 0.31                 | 0.064 (0.032)               | 4.7x10 <sup>-02</sup> | 0.030 (0.036)          | 4.0x10 <sup>-01</sup> | 0.049 (0.024)       | 4.1x10 <sup>-02</sup> |
| <i>MAFF</i>     | 22q13.1               | 14         | 0.059                | -0.19 (0.075)               | 1.3x10 <sup>-02</sup> | -0.006 (0.10)          | 9.5x10 <sup>-01</sup> | -0.12 (0.060)       | 4.2x10 <sup>-02</sup> |
| <i>NME4</i>     | 16p13.3               | 47         | 0.5                  | -0.052 (0.024)              | 2.8x10 <sup>-02</sup> | -0.015 (0.028)         | 5.8x10 <sup>-01</sup> | -0.037 (0.018)      | 4.2x10 <sup>-02</sup> |
| <i>NDUFB1</i>   | 14q32.12              | 10         | 0.011                | 0.50 (0.24)                 | 3.8x10 <sup>-02</sup> | 0.19 (0.29)            | 5.1x10 <sup>-01</sup> | 0.38 (0.18)         | 4.2x10 <sup>-02</sup> |
| <i>TM2D3</i>    | 15q26.3               | 13         | 0.039                | -0.21 (0.10)                | 3.8x10 <sup>-02</sup> | -0.083 (0.12)          | 4.7x10 <sup>-01</sup> | -0.16 (0.076)       | 4.2x10 <sup>-02</sup> |

| Gene            | Location <sup>a</sup> | # SNPs in  | Imputation           | Discovery U4C Meta-analysis |                       | UK Biobank Replication |                       | Joint Meta-analysis |                       |
|-----------------|-----------------------|------------|----------------------|-----------------------------|-----------------------|------------------------|-----------------------|---------------------|-----------------------|
|                 |                       | Prediction | Quality <sup>b</sup> | Beta (SE)                   | p-value               | Beta (SE)              | p-value               | Beta (SE)           | p-value               |
| <i>SPRYD3</i>   | 12q13.13              | 14         | 0.06                 | -0.18 (0.071)               | 1.2x10 <sup>-02</sup> | 0.024 (0.11)           | 8.3x10 <sup>-01</sup> | -0.12 (0.060)       | 4.3x10 <sup>-02</sup> |
| <i>STX1B</i>    | 16p11.2               | 23         | 0.045                | -0.20 (0.087)               | 2.4x10 <sup>-02</sup> | -0.050 (0.096)         | 6.0x10 <sup>-01</sup> | -0.13 (0.064)       | 4.3x10 <sup>-02</sup> |
| <i>SLK</i>      | 10q24.33              | 32         | 0.08                 | 0.12 (0.061)                | 4.6x10 <sup>-02</sup> | 0.058 (0.078)          | 4.6x10 <sup>-01</sup> | 0.098 (0.048)       | 4.3x10 <sup>-02</sup> |
| <i>POLR3D</i>   | 8p21.3                | 8          | 0.093                | 0.17 (0.074)                | 2.4x10 <sup>-02</sup> | 0.041 (0.081)          | 6.1x10 <sup>-01</sup> | 0.11 (0.055)        | 4.4x10 <sup>-02</sup> |
| <i>GNA13</i>    | 17q24.1               | 7          | 0.012                | -0.37 (0.18)                | 3.7x10 <sup>-02</sup> | -0.13 (0.26)           | 6.1x10 <sup>-01</sup> | -0.29 (0.15)        | 4.4x10 <sup>-02</sup> |
| <i>VIL1</i>     | 2q35                  | 6          | 0.084                | 0.15 (0.072)                | 3.7x10 <sup>-02</sup> | 0.056 (0.078)          | 4.8x10 <sup>-01</sup> | 0.11 (0.053)        | 4.4x10 <sup>-02</sup> |
| <i>C16orf62</i> | 16p12.3               | 11         | 0.021                | 0.27 (0.12)                 | 2.5x10 <sup>-02</sup> | 0.068 (0.14)           | 6.3x10 <sup>-01</sup> | 0.18 (0.091)        | 4.5x10 <sup>-02</sup> |
| <i>HLA-DOB</i>  | 6p21.32               | 51         | 0.47                 | -0.058 (0.025)              | 1.8x10 <sup>-02</sup> | -0.009 (0.030)         | 7.7x10 <sup>-01</sup> | -0.038 (0.019)      | 4.6x10 <sup>-02</sup> |
| <i>CNNM2</i>    | 10q24.32              | 11         | 0.0076               | -0.35 (0.16)                | 2.7x10 <sup>-02</sup> | -0.080 (0.22)          | 7.1x10 <sup>-01</sup> | -0.26 (0.13)        | 4.6x10 <sup>-02</sup> |
| <i>NKD1</i>     | 16q12.1               | 49         | 0.075                | -0.13 (0.053)               | 1.8x10 <sup>-02</sup> | -0.007 (0.075)         | 9.3x10 <sup>-01</sup> | -0.086 (0.043)      | 4.7x10 <sup>-02</sup> |
| <i>CTAGE5</i>   | 14q21.1               | 15         | 0.023                | -0.29 (0.11)                | 8.4x10 <sup>-03</sup> | 0.034 (0.15)           | 8.2x10 <sup>-01</sup> | -0.18 (0.089)       | 4.8x10 <sup>-02</sup> |
| <i>KRT74</i>    | 12q13.13              | 51         | 0.3                  | -0.076 (0.030)              | 1.2x10 <sup>-02</sup> | 0.000 (0.039)          | 1.00E+00              | -0.048 (0.024)      | 4.8x10 <sup>-02</sup> |
| <i>GCOM1</i>    | 15q21.3               | 75         | 0.67                 | -0.055 (0.020)              | 4.8x10 <sup>-03</sup> | 0.007 (0.023)          | 7.6x10 <sup>-01</sup> | -0.030 (0.015)      | 4.9x10 <sup>-02</sup> |
| <i>PRSS50</i>   | 3p21.31               | 18         | 0.1                  | 0.097 (0.047)               | 4.1x10 <sup>-02</sup> | 0.033 (0.073)          | 6.5x10 <sup>-01</sup> | 0.078 (0.040)       | 4.9x10 <sup>-02</sup> |
| <i>KRT73</i>    | 12q13.13              | 53         | 0.53                 | -0.052 (0.022)              | 1.6x10 <sup>-02</sup> | -0.001 (0.029)         | 9.8x10 <sup>-01</sup> | -0.034 (0.017)      | 5.1x10 <sup>-02</sup> |
| <i>MPP2</i>     | 17q21.31              | 27         | 0.39                 | 0.051 (0.025)               | 4.1x10 <sup>-02</sup> | 0.018 (0.034)          | 6.0x10 <sup>-01</sup> | 0.039 (0.020)       | 5.1x10 <sup>-02</sup> |
| <i>SCUBE3</i>   | 6p21.31               | 31         | 0.049                | 0.20 (0.080)                | 1.5x10 <sup>-02</sup> | -0.005 (0.11)          | 9.7x10 <sup>-01</sup> | 0.13 (0.065)        | 5.2x10 <sup>-02</sup> |
| <i>PLIN3</i>    | 19p13.3               | 15         | 0.0085               | -0.34 (0.15)                | 2.0x10 <sup>-02</sup> | -0.042 (0.18)          | 8.1x10 <sup>-01</sup> | -0.22 (0.11)        | 5.2x10 <sup>-02</sup> |
| <i>RRP1</i>     | 21q22.3               | 51         | 0.12                 | 0.11 (0.049)                | 2.8x10 <sup>-02</sup> | 0.023 (0.059)          | 7.0x10 <sup>-01</sup> | 0.073 (0.038)       | 5.2x10 <sup>-02</sup> |
| <i>ADCY7</i>    | 16q12.1               | 26         | 0.31                 | -0.051 (0.024)              | 3.2x10 <sup>-02</sup> | -0.009 (0.038)         | 8.2x10 <sup>-01</sup> | -0.039 (0.020)      | 5.2x10 <sup>-02</sup> |
| <i>C12orf57</i> | 12p13.31              | 41         | 0.015                | 0.22 (0.11)                 | 3.5x10 <sup>-02</sup> | 0.035 (0.20)           | 8.6x10 <sup>-01</sup> | 0.18 (0.094)        | 5.2x10 <sup>-02</sup> |
| <i>GNPTAB</i>   | 12q23.2               | 14         | 0.021                | -0.23 (0.11)                | 4.2x10 <sup>-02</sup> | -0.077 (0.17)          | 6.4x10 <sup>-01</sup> | -0.18 (0.094)       | 5.2x10 <sup>-02</sup> |
| <i>CHD7</i>     | 8q12.1                | 25         | 0.059                | -0.21 (0.087)               | 1.3x10 <sup>-02</sup> | -0.015 (0.094)         | 8.7x10 <sup>-01</sup> | -0.12 (0.064)       | 5.3x10 <sup>-02</sup> |
| <i>CHD5</i>     | 1p36.31               | 34         | 0.057                | -0.18 (0.083)               | 2.7x10 <sup>-02</sup> | -0.041 (0.092)         | 6.6x10 <sup>-01</sup> | -0.12 (0.062)       | 5.3x10 <sup>-02</sup> |
| <i>LILRB4</i>   | 19q13.42              | 81         | 0.25                 | 0.067 (0.033)               | 4.5x10 <sup>-02</sup> | 0.024 (0.041)          | 5.5x10 <sup>-01</sup> | 0.050 (0.026)       | 5.3x10 <sup>-02</sup> |
| <i>TMEM200A</i> | 6q23.1                | 37         | 0.055                | -0.17 (0.069)               | 1.1x10 <sup>-02</sup> | 0.009 (0.087)          | 9.2x10 <sup>-01</sup> | -0.10 (0.054)       | 5.4x10 <sup>-02</sup> |
| <i>NUDT19</i>   | 19q13.11              | 36         | 0.05                 | -0.17 (0.062)               | 6.9x10 <sup>-03</sup> | 0.052 (0.091)          | 5.7x10 <sup>-01</sup> | -0.098 (0.051)      | 5.5x10 <sup>-02</sup> |

| Gene           | Location <sup>a</sup> | # SNPs in  | Imputation           | Discovery U4C Meta-analysis |                       | UK Biobank Replication |                       | Joint Meta-analysis |                       |
|----------------|-----------------------|------------|----------------------|-----------------------------|-----------------------|------------------------|-----------------------|---------------------|-----------------------|
|                |                       | Prediction | Quality <sup>b</sup> | Beta (SE)                   | p-value               | Beta (SE)              | p-value               | Beta (SE)           | p-value               |
| <i>BRD7</i>    | 16q12.1               | 20         | 0.32                 | -0.054 (0.024)              | 2.2x10 <sup>-02</sup> | 0.002 (0.038)          | 9.6x10 <sup>-01</sup> | -0.039 (0.020)      | 5.5x10 <sup>-02</sup> |
| <i>GLYCTK</i>  | 3p21.1                | 25         | 0.24                 | 0.077 (0.034)               | 2.2x10 <sup>-02</sup> | 0.010 (0.041)          | 8.1x10 <sup>-01</sup> | 0.050 (0.026)       | 5.5x10 <sup>-02</sup> |
| <i>ZNF575</i>  | 19q13.31              | 25         | 0.37                 | -0.10 (0.029)               | 5.6x10 <sup>-04</sup> | 0.035 (0.033)          | 2.9x10 <sup>-01</sup> | -0.042 (0.022)      | 5.6x10 <sup>-02</sup> |
| <i>FYTTD1</i>  | 3q29                  | 7          | 0.0054               | -0.58 (0.21)                | 6.7x10 <sup>-03</sup> | 0.16 (0.30)            | 6.0x10 <sup>-01</sup> | -0.34 (0.18)        | 5.6x10 <sup>-02</sup> |
| <i>RRP9</i>    | 3p21.2                | 17         | 0.0061               | 0.32 (0.13)                 | 1.5x10 <sup>-02</sup> | -0.038 (0.20)          | 8.5x10 <sup>-01</sup> | 0.21 (0.11)         | 5.6x10 <sup>-02</sup> |
| <i>USP28</i>   | 11q23.2               | 19         | 0.013                | 0.41 (0.20)                 | 3.6x10 <sup>-02</sup> | 0.12 (0.20)            | 5.4x10 <sup>-01</sup> | 0.27 (0.14)         | 5.6x10 <sup>-02</sup> |
| <i>GEMIN4</i>  | 17p13.3               | 16         | 0.086                | 0.11 (0.055)                | 4.1x10 <sup>-02</sup> | 0.031 (0.082)          | 7.0x10 <sup>-01</sup> | 0.087 (0.046)       | 5.6x10 <sup>-02</sup> |
| <i>AGMAT</i>   | 1p36.21               | 16         | 0.0077               | 0.40 (0.20)                 | 4.7x10 <sup>-02</sup> | 0.14 (0.24)            | 5.6x10 <sup>-01</sup> | 0.30 (0.16)         | 5.6x10 <sup>-02</sup> |
| <i>CHEK2</i>   | 22q12.1               | 23         | 0.045                | 0.17 (0.072)                | 2.1x10 <sup>-02</sup> | 0.009 (0.096)          | 9.2x10 <sup>-01</sup> | 0.11 (0.058)        | 5.7x10 <sup>-02</sup> |
| <i>MRI1</i>    | 19p13.2               | 57         | 0.097                | -0.11 (0.052)               | 4.2x10 <sup>-02</sup> | -0.032 (0.063)         | 6.1x10 <sup>-01</sup> | -0.076 (0.040)      | 5.8x10 <sup>-02</sup> |
| <i>SNTB1</i>   | 8q24.12               | 22         | 0.01                 | 0.36 (0.16)                 | 2.2x10 <sup>-02</sup> | 0.019 (0.21)           | 9.3x10 <sup>-01</sup> | 0.24 (0.13)         | 5.9x10 <sup>-02</sup> |
| <i>ZNF410</i>  | 14q24.3               | 11         | 0.023                | 0.19 (0.090)                | 3.3x10 <sup>-02</sup> | 0.008 (0.16)           | 9.6x10 <sup>-01</sup> | 0.15 (0.079)        | 5.9x10 <sup>-02</sup> |
| <i>TRDMT1</i>  | 10p13                 | 29         | 0.065                | -0.15 (0.070)               | 3.2x10 <sup>-02</sup> | -0.026 (0.091)         | 7.7x10 <sup>-01</sup> | -0.10 (0.055)       | 6.0x10 <sup>-02</sup> |
| <i>NUDT12</i>  | 5q21.2                | 40         | 0.48                 | -0.053 (0.026)              | 4.1x10 <sup>-02</sup> | -0.016 (0.028)         | 5.7x10 <sup>-01</sup> | -0.036 (0.019)      | 6.0x10 <sup>-02</sup> |
| <i>DNAL1</i>   | 14q24.3               | 27         | 0.0096               | 0.40 (0.14)                 | 3.9x10 <sup>-03</sup> | -0.047 (0.15)          | 7.5x10 <sup>-01</sup> | 0.19 (0.10)         | 6.1x10 <sup>-02</sup> |
| <i>CENPO</i>   | 2p23.3                | 10         | 0.021                | -0.27 (0.13)                | 3.0x10 <sup>-02</sup> | -0.056 (0.14)          | 6.9x10 <sup>-01</sup> | -0.18 (0.094)       | 6.1x10 <sup>-02</sup> |
| <i>C7orf46</i> | 7p15.3                | 32         | 0.35                 | -0.053 (0.026)              | 4.6x10 <sup>-02</sup> | -0.016 (0.035)         | 6.4x10 <sup>-01</sup> | -0.039 (0.021)      | 6.1x10 <sup>-02</sup> |
| <i>NOXO1</i>   | 16p13.3               | 33         | 0.26                 | -0.16 (0.042)               | 1.8x10 <sup>-04</sup> | 0.039 (0.040)          | 3.2x10 <sup>-01</sup> | -0.054 (0.029)      | 6.2x10 <sup>-02</sup> |
| <i>HLA-DMA</i> | 6p21.32               | 31         | 0.059                | -0.16 (0.063)               | 1.1x10 <sup>-02</sup> | 0.006 (0.072)          | 9.4x10 <sup>-01</sup> | -0.088 (0.047)      | 6.2x10 <sup>-02</sup> |
| <i>MS4A7</i>   | 11q12.2               | 27         | 0.26                 | -0.081 (0.033)              | 1.3x10 <sup>-02</sup> | 0.006 (0.042)          | 8.9x10 <sup>-01</sup> | -0.048 (0.026)      | 6.2x10 <sup>-02</sup> |
| <i>DLK2</i>    | 6p21.1                | 22         | 0.23                 | 0.084 (0.036)               | 1.9x10 <sup>-02</sup> | 0.004 (0.043)          | 9.3x10 <sup>-01</sup> | 0.051 (0.028)       | 6.2x10 <sup>-02</sup> |
| <i>SSX2IP</i>  | 1p22.3                | 11         | 0.014                | 0.34 (0.16)                 | 2.8x10 <sup>-02</sup> | 0.036 (0.21)           | 8.6x10 <sup>-01</sup> | 0.23 (0.12)         | 6.2x10 <sup>-02</sup> |
| <i>RNF111</i>  | 15q22.1               | 1          | 0.0078               | 4.80 (2.4)                  | 4.5x10 <sup>-02</sup> | 1.30 (3.5)             | 7.2x10 <sup>-01</sup> | 3.70 (2.0)          | 6.2x10 <sup>-02</sup> |
| <i>FAH</i>     | 15q25.1               | 49         | 0.16                 | 0.18 (0.054)                | 1.0x10 <sup>-03</sup> | -0.042 (0.056)         | 4.6x10 <sup>-01</sup> | 0.073 (0.039)       | 6.3x10 <sup>-02</sup> |
| <i>C7orf41</i> | 7p14.3                | 8          | 0.032                | 0.26 (0.12)                 | 2.3x10 <sup>-02</sup> | 0.017 (0.15)           | 9.1x10 <sup>-01</sup> | 0.17 (0.091)        | 6.4x10 <sup>-02</sup> |
| <i>GHRL</i>    | 3p25.3                | 34         | 0.063                | -0.19 (0.060)               | 1.4x10 <sup>-03</sup> | 0.12 (0.086)           | 1.6x10 <sup>-01</sup> | -0.090 (0.049)      | 6.6x10 <sup>-02</sup> |
| <i>DNAH1</i>   | 3p21.1                | 16         | 0.051                | 0.14 (0.070)                | 4.3x10 <sup>-02</sup> | 0.033 (0.097)          | 7.4x10 <sup>-01</sup> | 0.11 (0.057)        | 6.6x10 <sup>-02</sup> |

| Gene             | Location <sup>a</sup> | # SNPs in  | Imputation           | Discovery U4C Meta-analysis |                       | UK Biobank Replication |                       | Joint Meta-analysis |                       |
|------------------|-----------------------|------------|----------------------|-----------------------------|-----------------------|------------------------|-----------------------|---------------------|-----------------------|
|                  |                       | Prediction | Quality <sup>b</sup> | Beta (SE)                   | p-value               | Beta (SE)              | p-value               | Beta (SE)           | p-value               |
| <i>PLEKHA3</i>   | 2q31.2                | 18         | 0.019                | -0.29 (0.11)                | 8.8x10 <sup>-03</sup> | 0.068 (0.15)           | 6.5x10 <sup>-01</sup> | -0.16 (0.088)       | 6.7x10 <sup>-02</sup> |
| <i>H2AFZ</i>     | 4q23                  | 17         | 0.1                  | 0.11 (0.055)                | 4.4x10 <sup>-02</sup> | 0.026 (0.073)          | 7.2x10 <sup>-01</sup> | 0.080 (0.044)       | 6.7x10 <sup>-02</sup> |
| <i>SULF2</i>     | 20q13.13              | 63         | 0.39                 | -0.099 (0.030)              | 1.0x10 <sup>-03</sup> | 0.031 (0.034)          | 3.5x10 <sup>-01</sup> | -0.041 (0.023)      | 6.8x10 <sup>-02</sup> |
| <i>PPP2R1A</i>   | 19q13.41              | 34         | 0.011                | 0.35 (0.12)                 | 3.3x10 <sup>-03</sup> | -0.13 (0.16)           | 4.0x10 <sup>-01</sup> | 0.18 (0.096)        | 6.8x10 <sup>-02</sup> |
| <i>KCNK17</i>    | 6p21.2                | 32         | 0.71                 | -0.049 (0.020)              | 1.3x10 <sup>-02</sup> | 0.003 (0.023)          | 9.1x10 <sup>-01</sup> | -0.028 (0.015)      | 6.8x10 <sup>-02</sup> |
| <i>PHYH</i>      | 10p13                 | 24         | 0.21                 | 0.13 (0.043)                | 3.9x10 <sup>-03</sup> | -0.025 (0.049)         | 6.1x10 <sup>-01</sup> | 0.059 (0.032)       | 6.9x10 <sup>-02</sup> |
| <i>SREK1IP1</i>  | 5q12.3                | 18         | 0.029                | 0.28 (0.11)                 | 7.3x10 <sup>-03</sup> | -0.072 (0.14)          | 6.0x10 <sup>-01</sup> | 0.15 (0.083)        | 7.0x10 <sup>-02</sup> |
| <i>THBS4</i>     | 5q14.1                | 35         | 0.019                | -0.29 (0.11)                | 8.9x10 <sup>-03</sup> | 0.051 (0.14)           | 7.1x10 <sup>-01</sup> | -0.15 (0.086)       | 7.0x10 <sup>-02</sup> |
| <i>LRRC45</i>    | 17q25.3               | 18         | 0.24                 | -0.099 (0.037)              | 8.0x10 <sup>-03</sup> | 0.015 (0.044)          | 7.4x10 <sup>-01</sup> | -0.052 (0.029)      | 7.1x10 <sup>-02</sup> |
| <i>IER3</i>      | 6p21.33               | 27         | 0.17                 | -0.11 (0.050)               | 2.5x10 <sup>-02</sup> | -0.019 (0.044)         | 6.6x10 <sup>-01</sup> | -0.059 (0.033)      | 7.2x10 <sup>-02</sup> |
| <i>AMIGO1</i>    | 1p13.3                | 24         | 0.19                 | -0.10 (0.045)               | 2.6x10 <sup>-02</sup> | -0.011 (0.050)         | 8.3x10 <sup>-01</sup> | -0.060 (0.033)      | 7.2x10 <sup>-02</sup> |
| <i>CTNNA2</i>    | 2p12                  | 31         | 0.18                 | 0.091 (0.042)               | 2.9x10 <sup>-02</sup> | 0.009 (0.050)          | 8.5x10 <sup>-01</sup> | 0.058 (0.032)       | 7.2x10 <sup>-02</sup> |
| <i>RDX</i>       | 11q22.3               | 26         | 0.033                | -0.21 (0.081)               | 1.1x10 <sup>-02</sup> | 0.030 (0.099)          | 7.7x10 <sup>-01</sup> | -0.11 (0.063)       | 7.3x10 <sup>-02</sup> |
| <i>TNFSF12</i>   | 17p13.1               | 15         | 0.34                 | -0.080 (0.038)              | 3.6x10 <sup>-02</sup> | -0.017 (0.037)         | 6.3x10 <sup>-01</sup> | -0.047 (0.026)      | 7.3x10 <sup>-02</sup> |
| <i>ZSWIM5</i>    | 1p34.1                | 36         | 0.097                | -0.14 (0.057)               | 1.2x10 <sup>-02</sup> | 0.004 (0.061)          | 9.5x10 <sup>-01</sup> | -0.075 (0.042)      | 7.4x10 <sup>-02</sup> |
| <i>PIGU</i>      | 20q11.22              | 6          | 0.0089               | 0.40 (0.18)                 | 2.6x10 <sup>-02</sup> | 0.005 (0.24)           | 9.8x10 <sup>-01</sup> | 0.25 (0.14)         | 7.4x10 <sup>-02</sup> |
| <i>PRRC1</i>     | 5q23.2                | 14         | 0.0077               | -0.33 (0.15)                | 2.9x10 <sup>-02</sup> | -0.012 (0.21)          | 9.6x10 <sup>-01</sup> | -0.22 (0.12)        | 7.4x10 <sup>-02</sup> |
| <i>ZNF37A</i>    | 10p11.1               | 41         | 0.091                | 0.067 (0.033)               | 4.5x10 <sup>-02</sup> | 0.007 (0.057)          | 9.1x10 <sup>-01</sup> | 0.051 (0.029)       | 7.4x10 <sup>-02</sup> |
| <i>SERPINB10</i> | 18q21.33              | 69         | 0.36                 | -0.060 (0.025)              | 1.5x10 <sup>-02</sup> | 0.009 (0.033)          | 7.8x10 <sup>-01</sup> | -0.035 (0.020)      | 7.5x10 <sup>-02</sup> |
| <i>CCDC28A</i>   | 6q24.1                | 62         | 0.097                | -0.14 (0.047)               | 3.0x10 <sup>-03</sup> | 0.063 (0.062)          | 3.1x10 <sup>-01</sup> | -0.066 (0.037)      | 7.6x10 <sup>-02</sup> |
| <i>FAM18B2</i>   | 17p12                 | 54         | 0.11                 | -0.13 (0.049)               | 9.0x10 <sup>-03</sup> | 0.022 (0.059)          | 7.1x10 <sup>-01</sup> | -0.066 (0.038)      | 7.7x10 <sup>-02</sup> |
| <i>ANKRD33B</i>  | 5p15.2                | 21         | 0.054                | -0.19 (0.075)               | 1.3x10 <sup>-02</sup> | 0.050 (0.11)           | 6.4x10 <sup>-01</sup> | -0.11 (0.061)       | 7.7x10 <sup>-02</sup> |
| <i>NOTCH4</i>    | 6p21.32               | 64         | 0.12                 | 0.094 (0.041)               | 2.1x10 <sup>-02</sup> | -0.006 (0.053)         | 9.1x10 <sup>-01</sup> | 0.057 (0.032)       | 7.7x10 <sup>-02</sup> |
| <i>SMARCD3</i>   | 7q36.1                | 39         | 0.027                | 0.22 (0.10)                 | 2.6x10 <sup>-02</sup> | 0.015 (0.12)           | 9.0x10 <sup>-01</sup> | 0.14 (0.077)        | 7.7x10 <sup>-02</sup> |
| <i>PPIA</i>      | 7p13                  | 26         | 0.073                | -0.14 (0.069)               | 4.7x10 <sup>-02</sup> | -0.033 (0.079)         | 6.8x10 <sup>-01</sup> | -0.092 (0.052)      | 7.7x10 <sup>-02</sup> |
| <i>FAM168A</i>   | 11q13.4               | 11         | 0.07                 | -0.16 (0.073)               | 2.7x10 <sup>-02</sup> | 0.000 (0.095)          | 1.00E+00              | -0.10 (0.058)       | 7.8x10 <sup>-02</sup> |
| <i>S1PR3</i>     | 9q22.1                | 15         | 0.066                | 0.17 (0.080)                | 2.9x10 <sup>-02</sup> | 0.010 (0.099)          | 9.2x10 <sup>-01</sup> | 0.11 (0.062)        | 7.9x10 <sup>-02</sup> |

| Gene           | Location <sup>a</sup> | # SNPs in  | Imputation           | Discovery U4C Meta-analysis |                       | UK Biobank Replication |                       | Joint Meta-analysis |                       |
|----------------|-----------------------|------------|----------------------|-----------------------------|-----------------------|------------------------|-----------------------|---------------------|-----------------------|
|                |                       | Prediction | Quality <sup>b</sup> | Beta (SE)                   | p-value               | Beta (SE)              | p-value               | Beta (SE)           | p-value               |
| <i>LRRC27</i>  | 10q26.3               | 35         | 0.67                 | 0.034 (0.017)               | 3.8x10 <sup>-02</sup> | 0.002 (0.024)          | 9.4x10 <sup>-01</sup> | 0.024 (0.014)       | 7.9x10 <sup>-02</sup> |
| <i>HECTD2</i>  | 10q23.32              | 2          | 0.04                 | 0.13 (0.059)                | 3.1x10 <sup>-02</sup> | -0.093 (0.14)          | 5.2x10 <sup>-01</sup> | 0.095 (0.054)       | 8.0x10 <sup>-02</sup> |
| <i>TALDO1</i>  | 11p15.5               | 6          | 0.013                | -0.33 (0.13)                | 1.5x10 <sup>-02</sup> | 0.16 (0.23)            | 4.9x10 <sup>-01</sup> | -0.20 (0.12)        | 8.1x10 <sup>-02</sup> |
| <i>SPDYE1</i>  | 7p13                  | 29         | 0.016                | 0.24 (0.100)                | 1.7x10 <sup>-02</sup> | -0.031 (0.13)          | 8.1x10 <sup>-01</sup> | 0.14 (0.079)        | 8.1x10 <sup>-02</sup> |
| <i>RPL10A</i>  | 6p21.31               | 26         | 0.17                 | 0.086 (0.042)               | 3.9x10 <sup>-02</sup> | 0.014 (0.049)          | 7.8x10 <sup>-01</sup> | 0.056 (0.032)       | 8.1x10 <sup>-02</sup> |
| <i>CYLD</i>    | 16q12.1               | 23         | 0.079                | -0.12 (0.059)               | 4.2x10 <sup>-02</sup> | -0.012 (0.081)         | 8.8x10 <sup>-01</sup> | -0.083 (0.048)      | 8.3x10 <sup>-02</sup> |
| <i>MED15</i>   | 22q11.21              | 27         | 0.048                | 0.22 (0.090)                | 1.5x10 <sup>-02</sup> | -0.018 (0.10)          | 8.7x10 <sup>-01</sup> | 0.12 (0.068)        | 8.4x10 <sup>-02</sup> |
| <i>CPSF2</i>   | 14q32.12              | 32         | 0.32                 | -0.055 (0.025)              | 2.4x10 <sup>-02</sup> | 0.013 (0.038)          | 7.4x10 <sup>-01</sup> | -0.035 (0.021)      | 8.5x10 <sup>-02</sup> |
| <i>SLC20A1</i> | 2q13                  | 22         | 0.3                  | 0.068 (0.034)               | 4.6x10 <sup>-02</sup> | 0.012 (0.040)          | 7.7x10 <sup>-01</sup> | 0.045 (0.026)       | 8.6x10 <sup>-02</sup> |
| <i>ALKBH2</i>  | 12q24.11              | 9          | 0.038                | -0.21 (0.080)               | 9.8x10 <sup>-03</sup> | 0.12 (0.13)            | 3.5x10 <sup>-01</sup> | -0.12 (0.068)       | 8.8x10 <sup>-02</sup> |
| <i>TTC28</i>   | 22q12.1               | 24         | 0.11                 | 0.12 (0.059)                | 3.9x10 <sup>-02</sup> | 0.009 (0.077)          | 9.1x10 <sup>-01</sup> | 0.080 (0.047)       | 8.8x10 <sup>-02</sup> |
| <i>KHDRBS2</i> | 6q11.1                | 16         | 0.034                | -0.21 (0.11)                | 4.8x10 <sup>-02</sup> | -0.042 (0.12)          | 7.3x10 <sup>-01</sup> | -0.14 (0.080)       | 8.8x10 <sup>-02</sup> |
| <i>UBE2E3</i>  | 2q31.3                | 76         | 0.22                 | 0.098 (0.035)               | 4.6x10 <sup>-03</sup> | -0.027 (0.040)         | 5.0x10 <sup>-01</sup> | 0.045 (0.026)       | 8.9x10 <sup>-02</sup> |
| <i>NDUFC1</i>  | 4q31.1                | 29         | 0.1                  | -0.13 (0.064)               | 4.4x10 <sup>-02</sup> | -0.024 (0.067)         | 7.2x10 <sup>-01</sup> | -0.079 (0.046)      | 9.0x10 <sup>-02</sup> |
| <i>AP2A1</i>   | 19q13.33              | 41         | 0.0076               | -0.30 (0.11)                | 5.2x10 <sup>-03</sup> | 0.14 (0.15)            | 3.3x10 <sup>-01</sup> | -0.14 (0.086)       | 9.2x10 <sup>-02</sup> |
| <i>MYO9B</i>   | 19p13.11              | 6          | 0.014                | 0.49 (0.19)                 | 9.9x10 <sup>-03</sup> | -0.14 (0.25)           | 5.6x10 <sup>-01</sup> | 0.25 (0.15)         | 9.2x10 <sup>-02</sup> |
| <i>TRPV6</i>   | 7q34                  | 131        | 0.25                 | 0.048 (0.020)               | 1.5x10 <sup>-02</sup> | -0.037 (0.037)         | 3.1x10 <sup>-01</sup> | 0.029 (0.017)       | 9.3x10 <sup>-02</sup> |
| <i>ZBTB7C</i>  | 18q21.1               | 36         | 0.13                 | 0.11 (0.053)                | 3.0x10 <sup>-02</sup> | -0.002 (0.066)         | 9.8x10 <sup>-01</sup> | 0.069 (0.041)       | 9.3x10 <sup>-02</sup> |
| <i>UBL7</i>    | 15q24.1               | 47         | 0.013                | 0.15 (0.069)                | 3.2x10 <sup>-02</sup> | -0.007 (0.093)         | 9.4x10 <sup>-01</sup> | 0.093 (0.055)       | 9.3x10 <sup>-02</sup> |
| <i>GGT7</i>    | 20q11.22              | 16         | 0.093                | -0.12 (0.055)               | 3.5x10 <sup>-02</sup> | 0.004 (0.075)          | 9.6x10 <sup>-01</sup> | -0.074 (0.044)      | 9.3x10 <sup>-02</sup> |
| <i>SDC3</i>    | 1p35.2                | 28         | 0.23                 | -0.061 (0.030)              | 4.4x10 <sup>-02</sup> | -0.001 (0.045)         | 9.8x10 <sup>-01</sup> | -0.042 (0.025)      | 9.3x10 <sup>-02</sup> |
| <i>CES4A</i>   | 16q22.1               | 37         | 0.011                | -0.23 (0.089)               | 8.3x10 <sup>-03</sup> | 0.093 (0.12)           | 4.4x10 <sup>-01</sup> | -0.12 (0.072)       | 9.4x10 <sup>-02</sup> |
| <i>ANP32E</i>  | 1q21.2                | 30         | 0.089                | 0.14 (0.061)                | 2.3x10 <sup>-02</sup> | 0.000 (0.068)          | 1.00E+00              | 0.076 (0.045)       | 9.4x10 <sup>-02</sup> |
| <i>ZCCHC7</i>  | 9p13.2                | 21         | 0.09                 | -0.15 (0.064)               | 1.6x10 <sup>-02</sup> | 0.015 (0.072)          | 8.4x10 <sup>-01</sup> | -0.080 (0.048)      | 9.5x10 <sup>-02</sup> |
| <i>SYNGR2</i>  | 17q25.3               | 47         | 0.11                 | -0.096 (0.046)              | 3.7x10 <sup>-02</sup> | 0.013 (0.072)          | 8.6x10 <sup>-01</sup> | -0.065 (0.039)      | 9.5x10 <sup>-02</sup> |
| <i>IL6ST</i>   | 5q11.2                | 32         | 0.036                | 0.27 (0.11)                 | 1.4x10 <sup>-02</sup> | -0.029 (0.12)          | 8.1x10 <sup>-01</sup> | 0.14 (0.082)        | 9.7x10 <sup>-02</sup> |
| <i>PTPRM</i>   | 18p11.23              | 174        | 0.33                 | 0.063 (0.027)               | 2.0x10 <sup>-02</sup> | -0.009 (0.034)         | 7.9x10 <sup>-01</sup> | 0.035 (0.021)       | 9.7x10 <sup>-02</sup> |

| Gene            | Location <sup>a</sup> | # SNPs in  | Imputation           | Discovery U4C Meta-analysis |                       | UK Biobank Replication |                       | Joint Meta-analysis |                       |
|-----------------|-----------------------|------------|----------------------|-----------------------------|-----------------------|------------------------|-----------------------|---------------------|-----------------------|
|                 |                       | Prediction | Quality <sup>b</sup> | Beta (SE)                   | p-value               | Beta (SE)              | p-value               | Beta (SE)           | p-value               |
| <i>AFAP1</i>    | 4p16.1                | 95         | 0.72                 | -0.046 (0.022)              | 3.1x10 <sup>-02</sup> | -0.003 (0.022)         | 8.9x10 <sup>-01</sup> | -0.025 (0.016)      | 1.0x10 <sup>-01</sup> |
| <i>ANXA5</i>    | 4q27                  | 66         | 0.51                 | -0.057 (0.021)              | 6.9x10 <sup>-03</sup> | 0.022 (0.026)          | 4.0x10 <sup>-01</sup> | -0.026 (0.017)      | 1.1x10 <sup>-01</sup> |
| <i>ZNF167</i>   | 3p21.31               | 83         | 0.14                 | -0.12 (0.049)               | 1.9x10 <sup>-02</sup> | 0.007 (0.050)          | 8.9x10 <sup>-01</sup> | -0.056 (0.035)      | 1.1x10 <sup>-01</sup> |
| <i>HTRA2</i>    | 2p13.1                | 31         | 0.03                 | -0.17 (0.074)               | 2.1x10 <sup>-02</sup> | 0.049 (0.10)           | 6.4x10 <sup>-01</sup> | -0.097 (0.060)      | 1.1x10 <sup>-01</sup> |
| <i>TRPV1</i>    | 17p13.2               | 52         | 0.13                 | 0.13 (0.059)                | 3.2x10 <sup>-02</sup> | 0.009 (0.055)          | 8.7x10 <sup>-01</sup> | 0.065 (0.040)       | 1.1x10 <sup>-01</sup> |
| <i>COL13A1</i>  | 10q22.1               | 21         | 0.061                | -0.18 (0.085)               | 3.3x10 <sup>-02</sup> | 0.006 (0.10)           | 9.5x10 <sup>-01</sup> | -0.11 (0.066)       | 1.1x10 <sup>-01</sup> |
| <i>IPO8</i>     | 12p11.21              | 47         | 0.12                 | -0.11 (0.052)               | 3.5x10 <sup>-02</sup> | -0.001 (0.060)         | 9.9x10 <sup>-01</sup> | -0.063 (0.039)      | 1.1x10 <sup>-01</sup> |
| <i>MAP3K1</i>   | 5q11.2                | 51         | 0.051                | 0.16 (0.080)                | 4.1x10 <sup>-02</sup> | 0.009 (0.090)          | 9.2x10 <sup>-01</sup> | 0.095 (0.060)       | 1.1x10 <sup>-01</sup> |
| <i>MTCH1</i>    | 6p21.2                | 19         | 0.022                | 0.27 (0.13)                 | 4.2x10 <sup>-02</sup> | 0.022 (0.15)           | 8.8x10 <sup>-01</sup> | 0.16 (0.098)        | 1.1x10 <sup>-01</sup> |
| <i>RPL9</i>     | 4p14                  | 21         | 0.83                 | -0.033 (0.016)              | 4.2x10 <sup>-02</sup> | 0.015 (0.032)          | 6.3x10 <sup>-01</sup> | -0.023 (0.014)      | 1.1x10 <sup>-01</sup> |
| <i>SNCG</i>     | 10q23.2               | 19         | 0.064                | 0.14 (0.068)                | 4.3x10 <sup>-02</sup> | -0.007 (0.097)         | 9.5x10 <sup>-01</sup> | 0.090 (0.056)       | 1.1x10 <sup>-01</sup> |
| <i>GRK5</i>     | 10q26.11              | 86         | 0.14                 | -0.076 (0.038)              | 4.4x10 <sup>-02</sup> | 0.001 (0.049)          | 9.8x10 <sup>-01</sup> | -0.047 (0.030)      | 1.1x10 <sup>-01</sup> |
| <i>PCBD2</i>    | 5q31.1                | 4          | 0.059                | -0.16 (0.082)               | 4.4x10 <sup>-02</sup> | 0.007 (0.11)           | 9.5x10 <sup>-01</sup> | -0.10 (0.066)       | 1.1x10 <sup>-01</sup> |
| <i>CDH4</i>     | 20q13.33              | 50         | 0.076                | -0.14 (0.068)               | 4.6x10 <sup>-02</sup> | -0.007 (0.081)         | 9.3x10 <sup>-01</sup> | -0.082 (0.052)      | 1.1x10 <sup>-01</sup> |
| <i>C22orf15</i> | 22q11.23              | 14         | 0.055                | -0.14 (0.068)               | 4.6x10 <sup>-02</sup> | 0.011 (0.10)           | 9.1x10 <sup>-01</sup> | -0.090 (0.057)      | 1.1x10 <sup>-01</sup> |
| <i>TMEM184A</i> | 7p22.3                | 15         | 0.076                | 0.17 (0.062)                | 4.9x10 <sup>-03</sup> | -0.093 (0.082)         | 2.5x10 <sup>-01</sup> | 0.077 (0.049)       | 1.2x10 <sup>-01</sup> |
| <i>THOC3</i>    | 5q35.2                | 22         | 0.05                 | 0.19 (0.073)                | 9.0x10 <sup>-03</sup> | -0.13 (0.11)           | 2.5x10 <sup>-01</sup> | 0.096 (0.061)       | 1.2x10 <sup>-01</sup> |
| <i>CELF1</i>    | 11p11.2               | 6          | 0.014                | 0.34 (0.14)                 | 1.4x10 <sup>-02</sup> | -0.11 (0.18)           | 5.4x10 <sup>-01</sup> | 0.18 (0.11)         | 1.2x10 <sup>-01</sup> |
| <i>IRAK2</i>    | 3p25.3                | 52         | 0.012                | -0.21 (0.086)               | 1.7x10 <sup>-02</sup> | 0.092 (0.13)           | 4.7x10 <sup>-01</sup> | -0.11 (0.071)       | 1.2x10 <sup>-01</sup> |
| <i>RC3H2</i>    | 9q33.2                | 14         | 0.033                | 0.19 (0.080)                | 1.7x10 <sup>-02</sup> | -0.15 (0.14)           | 2.9x10 <sup>-01</sup> | 0.11 (0.070)        | 1.2x10 <sup>-01</sup> |
| <i>ZNF197</i>   | 3p21.31               | 63         | 0.24                 | -0.10 (0.042)               | 1.8x10 <sup>-02</sup> | 0.005 (0.041)          | 9.0x10 <sup>-01</sup> | -0.046 (0.030)      | 1.2x10 <sup>-01</sup> |
| <i>PWWP2A</i>   | 5q33.3                | 28         | 0.099                | 0.12 (0.051)                | 2.0x10 <sup>-02</sup> | -0.029 (0.065)         | 6.6x10 <sup>-01</sup> | 0.063 (0.040)       | 1.2x10 <sup>-01</sup> |
| <i>PREPL</i>    | 2p21                  | 11         | 0.099                | -0.13 (0.056)               | 2.1x10 <sup>-02</sup> | 0.040 (0.075)          | 5.9x10 <sup>-01</sup> | -0.069 (0.045)      | 1.2x10 <sup>-01</sup> |
| <i>ZNF714</i>   | 19p12                 | 5          | 0.0072               | -0.37 (0.16)                | 2.4x10 <sup>-02</sup> | 0.19 (0.26)            | 4.6x10 <sup>-01</sup> | -0.21 (0.14)        | 1.2x10 <sup>-01</sup> |
| <i>ZC3H12D</i>  | 6q25.1                | 23         | 0.077                | -0.12 (0.054)               | 3.2x10 <sup>-02</sup> | 0.039 (0.084)          | 6.4x10 <sup>-01</sup> | -0.071 (0.046)      | 1.2x10 <sup>-01</sup> |
| <i>KRT72</i>    | 12q13.13              | 55         | 0.57                 | -0.044 (0.022)              | 4.2x10 <sup>-02</sup> | 0.001 (0.027)          | 9.7x10 <sup>-01</sup> | -0.027 (0.017)      | 1.2x10 <sup>-01</sup> |
| <i>PIK3C2A</i>  | 11p15.1               | 7          | 0.0079               | 0.57 (0.29)                 | 4.5x10 <sup>-02</sup> | -0.009 (0.36)          | 9.8x10 <sup>-01</sup> | 0.35 (0.22)         | 1.2x10 <sup>-01</sup> |

| Gene             | Location <sup>a</sup> | # SNPs in  | Imputation           | Discovery U4C Meta-analysis |                       | UK Biobank Replication |                       | Joint Meta-analysis |                       |
|------------------|-----------------------|------------|----------------------|-----------------------------|-----------------------|------------------------|-----------------------|---------------------|-----------------------|
|                  |                       | Prediction | Quality <sup>b</sup> | Beta (SE)                   | p-value               | Beta (SE)              | p-value               | Beta (SE)           | p-value               |
| <i>GART</i>      | 21q22.11              | 1          | 0.0091               | 0.44 (0.22)                 | 4.7x10 <sup>-02</sup> | -0.026 (0.30)          | 9.3x10 <sup>-01</sup> | 0.28 (0.18)         | 1.2x10 <sup>-01</sup> |
| <i>ESAM</i>      | 11q24.2               | 6          | 0.0052               | 0.51 (0.26)                 | 4.7x10 <sup>-02</sup> | -0.033 (0.36)          | 9.3x10 <sup>-01</sup> | 0.32 (0.21)         | 1.2x10 <sup>-01</sup> |
| <i>PTK2</i>      | 8q24.3                | 14         | 0.037                | -0.25 (0.095)               | 9.5x10 <sup>-03</sup> | 0.10 (0.12)            | 3.9x10 <sup>-01</sup> | -0.11 (0.075)       | 1.3x10 <sup>-01</sup> |
| <i>C17orf62</i>  | 17q25.3               | 25         | 0.1                  | -0.11 (0.044)               | 1.3x10 <sup>-02</sup> | 0.058 (0.063)          | 3.6x10 <sup>-01</sup> | -0.054 (0.036)      | 1.3x10 <sup>-01</sup> |
| <i>LATS2</i>     | 13q12.11              | 50         | 0.1                  | -0.14 (0.058)               | 1.5x10 <sup>-02</sup> | 0.025 (0.063)          | 7.0x10 <sup>-01</sup> | -0.065 (0.043)      | 1.3x10 <sup>-01</sup> |
| <i>FRMD4A</i>    | 10p13                 | 55         | 0.3                  | -0.077 (0.032)              | 1.7x10 <sup>-02</sup> | 0.018 (0.037)          | 6.3x10 <sup>-01</sup> | -0.037 (0.024)      | 1.3x10 <sup>-01</sup> |
| <i>SMAD5</i>     | 5q31.1                | 25         | 0.31                 | 0.067 (0.028)               | 1.8x10 <sup>-02</sup> | -0.022 (0.037)         | 5.6x10 <sup>-01</sup> | 0.034 (0.023)       | 1.3x10 <sup>-01</sup> |
| <i>C10orf116</i> | 10q23.2               | 33         | 0.086                | 0.16 (0.070)                | 2.6x10 <sup>-02</sup> | -0.013 (0.077)         | 8.6x10 <sup>-01</sup> | 0.079 (0.052)       | 1.3x10 <sup>-01</sup> |
| <i>CLCN2</i>     | 3q27.1                | 32         | 0.033                | 0.20 (0.097)                | 4.1x10 <sup>-02</sup> | 0.003 (0.11)           | 9.8x10 <sup>-01</sup> | 0.11 (0.072)        | 1.3x10 <sup>-01</sup> |
| <i>DPYSL4</i>    | 10q26.3               | 43         | 0.53                 | -0.056 (0.028)              | 4.3x10 <sup>-02</sup> | -0.003 (0.028)         | 9.1x10 <sup>-01</sup> | -0.030 (0.020)      | 1.3x10 <sup>-01</sup> |
| <i>C1GALT1</i>   | 7p22.1                | 31         | 0.31                 | 0.071 (0.036)               | 4.7x10 <sup>-02</sup> | 0.003 (0.038)          | 9.5x10 <sup>-01</sup> | 0.039 (0.026)       | 1.3x10 <sup>-01</sup> |
| <i>PLEKHA1</i>   | 10q26.13              | 29         | 0.15                 | 0.14 (0.050)                | 4.2x10 <sup>-03</sup> | -0.070 (0.061)         | 2.5x10 <sup>-01</sup> | 0.057 (0.039)       | 1.4x10 <sup>-01</sup> |
| <i>FAM20A</i>    | 17q24.2               | 18         | 0.059                | 0.20 (0.071)                | 5.1x10 <sup>-03</sup> | -0.11 (0.091)          | 2.2x10 <sup>-01</sup> | 0.081 (0.056)       | 1.4x10 <sup>-01</sup> |
| <i>ITPR1P</i>    | 10q25.1               | 40         | 0.092                | -0.14 (0.054)               | 9.8x10 <sup>-03</sup> | 0.041 (0.061)          | 5.0x10 <sup>-01</sup> | -0.061 (0.041)      | 1.4x10 <sup>-01</sup> |
| <i>CCDC93</i>    | 2q14.1                | 36         | 0.012                | -0.29 (0.12)                | 1.4x10 <sup>-02</sup> | 0.079 (0.14)           | 5.7x10 <sup>-01</sup> | -0.13 (0.090)       | 1.4x10 <sup>-01</sup> |
| <i>USP10</i>     | 16q24.1               | 77         | 0.069                | -0.16 (0.067)               | 1.5x10 <sup>-02</sup> | 0.035 (0.074)          | 6.4x10 <sup>-01</sup> | -0.074 (0.050)      | 1.4x10 <sup>-01</sup> |
| <i>POLR2D</i>    | 2q14.3                | 19         | 0.28                 | 0.093 (0.038)               | 1.5x10 <sup>-02</sup> | -0.019 (0.041)         | 6.4x10 <sup>-01</sup> | 0.041 (0.028)       | 1.4x10 <sup>-01</sup> |
| <i>RFWD2</i>     | 1q25.2                | 10         | 0.016                | -0.39 (0.19)                | 3.8x10 <sup>-02</sup> | 0.050 (0.23)           | 8.3x10 <sup>-01</sup> | -0.21 (0.14)        | 1.4x10 <sup>-01</sup> |
| <i>ARF3</i>      | 12q13.12              | 29         | 0.21                 | -0.063 (0.032)              | 4.8x10 <sup>-02</sup> | 0.015 (0.048)          | 7.5x10 <sup>-01</sup> | -0.039 (0.027)      | 1.4x10 <sup>-01</sup> |
| <i>FPR1</i>      | 19q13.41              | 51         | 0.39                 | -0.056 (0.028)              | 4.9x10 <sup>-02</sup> | 0.005 (0.037)          | 9.0x10 <sup>-01</sup> | -0.034 (0.023)      | 1.4x10 <sup>-01</sup> |
| <i>ZXDC</i>      | 3q21.3                | 26         | 0.026                | 0.23 (0.092)                | 1.4x10 <sup>-02</sup> | -0.066 (0.11)          | 5.3x10 <sup>-01</sup> | 0.10 (0.070)        | 1.5x10 <sup>-01</sup> |
| <i>ATXN7L2</i>   | 1p13.3                | 21         | 0.02                 | -0.28 (0.13)                | 2.3x10 <sup>-02</sup> | 0.089 (0.16)           | 5.8x10 <sup>-01</sup> | -0.14 (0.099)       | 1.5x10 <sup>-01</sup> |
| <i>ZNF487P</i>   | 10q11.21              | 2          | 0.011                | -0.60 (0.27)                | 2.6x10 <sup>-02</sup> | 0.11 (0.30)            | 7.2x10 <sup>-01</sup> | -0.28 (0.20)        | 1.5x10 <sup>-01</sup> |
| <i>SEMA7A</i>    | 15q24.1               | 2          | 0.0047               | 1.80 (0.82)                 | 3.1x10 <sup>-02</sup> | -0.38 (1.0)            | 7.1x10 <sup>-01</sup> | 0.92 (0.64)         | 1.5x10 <sup>-01</sup> |
| <i>ZNF563</i>    | 19p13.2               | 32         | 0.07                 | -0.10 (0.052)               | 4.8x10 <sup>-02</sup> | 0.021 (0.073)          | 7.8x10 <sup>-01</sup> | -0.061 (0.042)      | 1.5x10 <sup>-01</sup> |
| <i>FBXO2</i>     | 1p36.22               | 51         | 0.61                 | -0.068 (0.023)              | 3.7x10 <sup>-03</sup> | 0.028 (0.025)          | 2.7x10 <sup>-01</sup> | -0.024 (0.017)      | 1.6x10 <sup>-01</sup> |
| <i>TSPAN1</i>    | 1p34.1                | 3          | 0.052                | -0.19 (0.084)               | 2.0x10 <sup>-02</sup> | 0.085 (0.11)           | 4.5x10 <sup>-01</sup> | -0.095 (0.067)      | 1.6x10 <sup>-01</sup> |

| Gene            | Location <sup>a</sup> | # SNPs in  | Imputation           | Discovery U4C Meta-analysis |                       | UK Biobank Replication |                       | Joint Meta-analysis |                       |
|-----------------|-----------------------|------------|----------------------|-----------------------------|-----------------------|------------------------|-----------------------|---------------------|-----------------------|
|                 |                       | Prediction | Quality <sup>b</sup> | Beta (SE)                   | p-value               | Beta (SE)              | p-value               | Beta (SE)           | p-value               |
| <i>MNDA</i>     | 1q23.1                | 28         | 0.091                | 0.12 (0.052)                | 2.2x10 <sup>-02</sup> | -0.048 (0.069)         | 4.8x10 <sup>-01</sup> | 0.058 (0.041)       | 1.6x10 <sup>-01</sup> |
| <i>RPS8</i>     | 1p34.1                | 5          | 0.077                | -0.20 (0.089)               | 2.4x10 <sup>-02</sup> | 0.012 (0.082)          | 8.8x10 <sup>-01</sup> | -0.085 (0.060)      | 1.6x10 <sup>-01</sup> |
| <i>PTX4</i>     | 16p13.3               | 86         | 0.028                | 0.13 (0.058)                | 2.8x10 <sup>-02</sup> | -0.032 (0.071)         | 6.5x10 <sup>-01</sup> | 0.064 (0.045)       | 1.6x10 <sup>-01</sup> |
| <i>AQP11</i>    | 11q14.1               | 10         | 0.017                | -0.24 (0.12)                | 3.7x10 <sup>-02</sup> | 0.15 (0.20)            | 4.5x10 <sup>-01</sup> | -0.14 (0.099)       | 1.6x10 <sup>-01</sup> |
| <i>RNF139</i>   | 8q24.13               | 49         | 0.011                | -0.18 (0.089)               | 3.8x10 <sup>-02</sup> | 0.048 (0.12)           | 6.8x10 <sup>-01</sup> | -0.099 (0.070)      | 1.6x10 <sup>-01</sup> |
| <i>DCTD</i>     | 4q35.1                | 31         | 0.21                 | 0.091 (0.037)               | 1.4x10 <sup>-02</sup> | -0.056 (0.052)         | 2.7x10 <sup>-01</sup> | 0.041 (0.030)       | 1.7x10 <sup>-01</sup> |
| <i>TMEM8B</i>   | 9p13.3                | 22         | 0.066                | 0.17 (0.075)                | 2.2x10 <sup>-02</sup> | -0.049 (0.087)         | 5.7x10 <sup>-01</sup> | 0.077 (0.057)       | 1.7x10 <sup>-01</sup> |
| <i>OLFML1</i>   | 11p15.4               | 11         | 0.064                | 0.17 (0.079)                | 2.8x10 <sup>-02</sup> | -0.067 (0.11)          | 5.3x10 <sup>-01</sup> | 0.087 (0.064)       | 1.7x10 <sup>-01</sup> |
| <i>HK1</i>      | 10q22.1               | 31         | 0.031                | 0.18 (0.087)                | 3.5x10 <sup>-02</sup> | -0.053 (0.11)          | 6.4x10 <sup>-01</sup> | 0.094 (0.069)       | 1.7x10 <sup>-01</sup> |
| <i>MICA</i>     | 6p21.33               | 84         | 0.67                 | -0.035 (0.017)              | 3.7x10 <sup>-02</sup> | 0.013 (0.023)          | 5.8x10 <sup>-01</sup> | -0.019 (0.014)      | 1.7x10 <sup>-01</sup> |
| <i>LTN1</i>     | 21q21.3               | 9          | 0.033                | -0.27 (0.13)                | 3.7x10 <sup>-02</sup> | 0.055 (0.15)           | 7.2x10 <sup>-01</sup> | -0.13 (0.098)       | 1.7x10 <sup>-01</sup> |
| <i>ALDH6A1</i>  | 14q24.3               | 20         | 0.042                | 0.15 (0.072)                | 3.8x10 <sup>-02</sup> | -0.055 (0.10)          | 5.9x10 <sup>-01</sup> | 0.081 (0.059)       | 1.7x10 <sup>-01</sup> |
| <i>PTPRA</i>    | 20p13                 | 28         | 0.054                | -0.19 (0.091)               | 3.9x10 <sup>-02</sup> | 0.027 (0.10)           | 7.9x10 <sup>-01</sup> | -0.093 (0.068)      | 1.7x10 <sup>-01</sup> |
| <i>C1QTNF4</i>  | 11p11.2               | 41         | 0.69                 | 0.044 (0.019)               | 2.1x10 <sup>-02</sup> | -0.014 (0.022)         | 5.2x10 <sup>-01</sup> | 0.019 (0.014)       | 1.8x10 <sup>-01</sup> |
| <i>KATNB1</i>   | 16q21                 | 47         | 0.041                | -0.15 (0.066)               | 2.2x10 <sup>-02</sup> | 0.063 (0.083)          | 4.5x10 <sup>-01</sup> | -0.068 (0.052)      | 1.8x10 <sup>-01</sup> |
| <i>C7orf53</i>  | 7q31.1                | 101        | 0.12                 | -0.075 (0.035)              | 3.3x10 <sup>-02</sup> | 0.026 (0.046)          | 5.7x10 <sup>-01</sup> | -0.038 (0.028)      | 1.8x10 <sup>-01</sup> |
| <i>PPM1M</i>    | 3p21.2                | 32         | 0.17                 | 0.084 (0.039)               | 3.4x10 <sup>-02</sup> | -0.022 (0.048)         | 6.5x10 <sup>-01</sup> | 0.041 (0.031)       | 1.8x10 <sup>-01</sup> |
| <i>DUSP18</i>   | 22q12.2               | 58         | 0.32                 | 0.059 (0.029)               | 4.2x10 <sup>-02</sup> | -0.011 (0.035)         | 7.5x10 <sup>-01</sup> | 0.030 (0.022)       | 1.8x10 <sup>-01</sup> |
| <i>FAM83A</i>   | 8q24.13               | 17         | 0.3                  | 0.063 (0.031)               | 4.2x10 <sup>-02</sup> | -0.017 (0.040)         | 6.7x10 <sup>-01</sup> | 0.033 (0.024)       | 1.8x10 <sup>-01</sup> |
| <i>FOXK2</i>    | 17q25.3               | 23         | 0.057                | 0.15 (0.059)                | 1.1x10 <sup>-02</sup> | -0.13 (0.088)          | 1.4x10 <sup>-01</sup> | 0.063 (0.049)       | 1.9x10 <sup>-01</sup> |
| <i>RNMT</i>     | 18p11.21              | 24         | 0.16                 | -0.11 (0.048)               | 1.6x10 <sup>-02</sup> | 0.032 (0.050)          | 5.3x10 <sup>-01</sup> | -0.046 (0.035)      | 1.9x10 <sup>-01</sup> |
| <i>PHLDA1</i>   | 12q21.2               | 34         | 0.025                | 0.22 (0.095)                | 2.1x10 <sup>-02</sup> | -0.16 (0.14)           | 2.7x10 <sup>-01</sup> | 0.10 (0.079)        | 1.9x10 <sup>-01</sup> |
| <i>TCP11L2</i>  | 12q23.3               | 31         | 0.075                | 0.14 (0.061)                | 2.4x10 <sup>-02</sup> | -0.046 (0.072)         | 5.3x10 <sup>-01</sup> | 0.061 (0.047)       | 1.9x10 <sup>-01</sup> |
| <i>GSTK1</i>    | 7q34                  | 16         | 0.15                 | 0.081 (0.039)               | 3.7x10 <sup>-02</sup> | -0.044 (0.058)         | 4.5x10 <sup>-01</sup> | 0.042 (0.032)       | 1.9x10 <sup>-01</sup> |
| <i>MKS1</i>     | 17q22                 | 27         | 0.0076               | -0.34 (0.11)                | 1.8x10 <sup>-03</sup> | 0.31 (0.15)            | 3.5x10 <sup>-02</sup> | -0.11 (0.087)       | 2.0x10 <sup>-01</sup> |
| <i>ARHGAP32</i> | 11q24.3               | 31         | 0.1                  | 0.17 (0.059)                | 4.0x10 <sup>-03</sup> | -0.12 (0.074)          | 1.2x10 <sup>-01</sup> | 0.059 (0.046)       | 2.0x10 <sup>-01</sup> |
| <i>ADSL</i>     | 22q13.1               | 9          | 0.025                | 0.27 (0.11)                 | 1.4x10 <sup>-02</sup> | -0.11 (0.13)           | 3.8x10 <sup>-01</sup> | 0.11 (0.084)        | 2.0x10 <sup>-01</sup> |

| Gene           | Location <sup>a</sup> | # SNPs in  | Imputation           | Discovery U4C Meta-analysis |                       | UK Biobank Replication |                       | Joint Meta-analysis |                       |
|----------------|-----------------------|------------|----------------------|-----------------------------|-----------------------|------------------------|-----------------------|---------------------|-----------------------|
|                |                       | Prediction | Quality <sup>b</sup> | Beta (SE)                   | p-value               | Beta (SE)              | p-value               | Beta (SE)           | p-value               |
| <i>ZNF438</i>  | 10p11.22              | 17         | 0.02                 | -0.30 (0.13)                | 1.9x10 <sup>-02</sup> | 0.12 (0.15)            | 4.4x10 <sup>-01</sup> | -0.13 (0.098)       | 2.0x10 <sup>-01</sup> |
| <i>FAM96A</i>  | 15q22.31              | 14         | 0.005                | 0.42 (0.18)                 | 1.9x10 <sup>-02</sup> | -0.29 (0.26)           | 2.6x10 <sup>-01</sup> | 0.19 (0.15)         | 2.0x10 <sup>-01</sup> |
| <i>TRNT1</i>   | 3p26.2                | 26         | 0.31                 | -0.063 (0.028)              | 2.3x10 <sup>-02</sup> | 0.036 (0.038)          | 3.4x10 <sup>-01</sup> | -0.029 (0.022)      | 2.0x10 <sup>-01</sup> |
| <i>TTC9C</i>   | 11q12.3               | 30         | 0.25                 | -0.069 (0.032)              | 2.9x10 <sup>-02</sup> | 0.030 (0.041)          | 4.6x10 <sup>-01</sup> | -0.033 (0.025)      | 2.0x10 <sup>-01</sup> |
| <i>SND1</i>    | 7q32.1                | 13         | 0.045                | 0.31 (0.12)                 | 1.1x10 <sup>-02</sup> | -0.098 (0.12)          | 4.2x10 <sup>-01</sup> | 0.11 (0.086)        | 2.1x10 <sup>-01</sup> |
| <i>ZNF76</i>   | 6p21.31               | 23         | 0.12                 | -0.095 (0.043)              | 2.6x10 <sup>-02</sup> | 0.073 (0.065)          | 2.7x10 <sup>-01</sup> | -0.045 (0.036)      | 2.1x10 <sup>-01</sup> |
| <i>FUT8</i>    | 14q23.3               | 26         | 0.19                 | 0.091 (0.044)               | 3.8x10 <sup>-02</sup> | -0.031 (0.054)         | 5.7x10 <sup>-01</sup> | 0.043 (0.034)       | 2.1x10 <sup>-01</sup> |
| <i>C5orf20</i> | 5q31.1                | 29         | 0.043                | -0.17 (0.080)               | 3.9x10 <sup>-02</sup> | 0.057 (0.10)           | 5.7x10 <sup>-01</sup> | -0.079 (0.063)      | 2.1x10 <sup>-01</sup> |
| <i>ISCU</i>    | 12q23.3               | 72         | 0.29                 | 0.062 (0.031)               | 4.5x10 <sup>-02</sup> | -0.018 (0.038)         | 6.4x10 <sup>-01</sup> | 0.030 (0.024)       | 2.1x10 <sup>-01</sup> |
| <i>ZNF668</i>  | 16p11.2               | 22         | 0.26                 | 0.10 (0.039)                | 8.8x10 <sup>-03</sup> | -0.036 (0.040)         | 3.6x10 <sup>-01</sup> | 0.034 (0.028)       | 2.2x10 <sup>-01</sup> |
| <i>CLPB</i>    | 11q13.4               | 29         | 0.0067               | 0.25 (0.098)                | 1.3x10 <sup>-02</sup> | -0.28 (0.16)           | 8.2x10 <sup>-02</sup> | 0.10 (0.084)        | 2.2x10 <sup>-01</sup> |
| <i>PROCR</i>   | 20q11.22              | 38         | 0.041                | 0.17 (0.075)                | 2.5x10 <sup>-02</sup> | -0.045 (0.079)         | 5.7x10 <sup>-01</sup> | 0.067 (0.054)       | 2.2x10 <sup>-01</sup> |
| <i>DHX37</i>   | 12q24.31              | 31         | 0.014                | 0.29 (0.13)                 | 3.1x10 <sup>-02</sup> | -0.11 (0.16)           | 4.9x10 <sup>-01</sup> | 0.13 (0.10)         | 2.2x10 <sup>-01</sup> |
| <i>AKAP3</i>   | 12p13.32              | 11         | 0.3                  | 0.061 (0.031)               | 4.9x10 <sup>-02</sup> | -0.020 (0.039)         | 6.2x10 <sup>-01</sup> | 0.030 (0.024)       | 2.2x10 <sup>-01</sup> |
| <i>MCM3</i>    | 6p12.2                | 43         | 0.024                | -0.30 (0.11)                | 7.8x10 <sup>-03</sup> | 0.13 (0.12)            | 2.7x10 <sup>-01</sup> | -0.097 (0.081)      | 2.3x10 <sup>-01</sup> |
| <i>PDHB</i>    | 3p14.3                | 44         | 0.24                 | -0.075 (0.030)              | 1.1x10 <sup>-02</sup> | 0.062 (0.041)          | 1.4x10 <sup>-01</sup> | -0.029 (0.024)      | 2.3x10 <sup>-01</sup> |
| <i>CCDC127</i> | 5p15.33               | 15         | 0.33                 | -0.072 (0.030)              | 1.8x10 <sup>-02</sup> | 0.032 (0.036)          | 3.6x10 <sup>-01</sup> | -0.028 (0.023)      | 2.3x10 <sup>-01</sup> |
| <i>PCYOX1L</i> | 5q32                  | 25         | 0.39                 | 0.058 (0.025)               | 2.3x10 <sup>-02</sup> | -0.033 (0.033)         | 3.2x10 <sup>-01</sup> | 0.024 (0.020)       | 2.3x10 <sup>-01</sup> |
| <i>PTER</i>    | 10p13                 | 45         | 0.28                 | 0.073 (0.035)               | 3.6x10 <sup>-02</sup> | -0.027 (0.042)         | 5.1x10 <sup>-01</sup> | 0.032 (0.027)       | 2.3x10 <sup>-01</sup> |
| <i>FAM26F</i>  | 6q22.1                | 104        | 0.49                 | -0.057 (0.024)              | 1.6x10 <sup>-02</sup> | 0.028 (0.028)          | 3.2x10 <sup>-01</sup> | -0.021 (0.018)      | 2.4x10 <sup>-01</sup> |
| <i>PPP1R3B</i> | 8p23.1                | 12         | 0.0087               | 0.43 (0.18)                 | 1.7x10 <sup>-02</sup> | -0.22 (0.22)           | 3.1x10 <sup>-01</sup> | 0.16 (0.14)         | 2.4x10 <sup>-01</sup> |
| <i>PPM1K</i>   | 4q22.1                | 23         | 0.088                | 0.14 (0.065)                | 3.3x10 <sup>-02</sup> | -0.043 (0.072)         | 5.5x10 <sup>-01</sup> | 0.056 (0.048)       | 2.4x10 <sup>-01</sup> |
| <i>HAGHL</i>   | 16p13.3               | 37         | 0.23                 | -0.074 (0.035)              | 3.7x10 <sup>-02</sup> | 0.031 (0.044)          | 4.8x10 <sup>-01</sup> | -0.032 (0.027)      | 2.4x10 <sup>-01</sup> |
| <i>ACACB</i>   | 12q24.11              | 29         | 0.28                 | -0.060 (0.030)              | 4.7x10 <sup>-02</sup> | 0.024 (0.038)          | 5.3x10 <sup>-01</sup> | -0.028 (0.024)      | 2.4x10 <sup>-01</sup> |
| <i>ADSSL1</i>  | 14q32.33              | 10         | 0.015                | -0.32 (0.16)                | 4.9x10 <sup>-02</sup> | 0.095 (0.19)           | 6.1x10 <sup>-01</sup> | -0.14 (0.12)        | 2.4x10 <sup>-01</sup> |
| <i>NAA20</i>   | 20p11.23              | 27         | 0.014                | -0.27 (0.11)                | 2.0x10 <sup>-02</sup> | 0.23 (0.17)            | 1.7x10 <sup>-01</sup> | -0.11 (0.094)       | 2.5x10 <sup>-01</sup> |
| <i>ZNF202</i>  | 11q24.1               | 15         | 0.054                | 0.20 (0.092)                | 2.9x10 <sup>-02</sup> | -0.11 (0.12)           | 3.6x10 <sup>-01</sup> | 0.082 (0.072)       | 2.5x10 <sup>-01</sup> |

| Gene            | Location <sup>a</sup> | # SNPs in  | Imputation           | Discovery U4C Meta-analysis |                       | UK Biobank Replication |                       | Joint Meta-analysis |                       |
|-----------------|-----------------------|------------|----------------------|-----------------------------|-----------------------|------------------------|-----------------------|---------------------|-----------------------|
|                 |                       | Prediction | Quality <sup>b</sup> | Beta (SE)                   | p-value               | Beta (SE)              | p-value               | Beta (SE)           | p-value               |
| <i>RPF2</i>     | 6q21                  | 8          | 0.24                 | -0.064 (0.031)              | 4.0x10 <sup>-02</sup> | 0.038 (0.044)          | 3.8x10 <sup>-01</sup> | -0.030 (0.025)      | 2.5x10 <sup>-01</sup> |
| <i>CABIN1</i>   | 22q11.23              | 18         | 0.0073               | 0.25 (0.13)                 | 4.7x10 <sup>-02</sup> | -0.25 (0.22)           | 2.6x10 <sup>-01</sup> | 0.13 (0.11)         | 2.5x10 <sup>-01</sup> |
| <i>NUCB2</i>    | 11p15.1               | 30         | 0.11                 | 0.14 (0.054)                | 7.9x10 <sup>-03</sup> | -0.087 (0.063)         | 1.7x10 <sup>-01</sup> | 0.047 (0.041)       | 2.6x10 <sup>-01</sup> |
| <i>C6orf57</i>  | 6q13                  | 11         | 0.019                | 0.36 (0.14)                 | 8.7x10 <sup>-03</sup> | -0.22 (0.16)           | 1.8x10 <sup>-01</sup> | 0.12 (0.11)         | 2.6x10 <sup>-01</sup> |
| <i>ZNF502</i>   | 3p21.31               | 46         | 0.6                  | -0.071 (0.027)              | 9.1x10 <sup>-03</sup> | 0.024 (0.026)          | 3.5x10 <sup>-01</sup> | -0.021 (0.019)      | 2.6x10 <sup>-01</sup> |
| <i>C10orf10</i> | 10q11.21              | 31         | 0.035                | 0.14 (0.069)                | 3.9x10 <sup>-02</sup> | -0.12 (0.11)           | 2.8x10 <sup>-01</sup> | 0.066 (0.058)       | 2.6x10 <sup>-01</sup> |
| <i>SYNGR3</i>   | 16p13.3               | 10         | 0.36                 | 0.10 (0.038)                | 7.8x10 <sup>-03</sup> | -0.032 (0.035)         | 3.6x10 <sup>-01</sup> | 0.029 (0.026)       | 2.7x10 <sup>-01</sup> |
| <i>MAPK8IP2</i> | 22q13.33              | 13         | 0.04                 | -0.22 (0.086)               | 1.2x10 <sup>-02</sup> | 0.18 (0.12)            | 1.2x10 <sup>-01</sup> | -0.075 (0.069)      | 2.7x10 <sup>-01</sup> |
| <i>DYNLRB1</i>  | 20q11.22              | 40         | 0.0048               | 0.21 (0.087)                | 1.5x10 <sup>-02</sup> | -0.25 (0.14)           | 7.1x10 <sup>-02</sup> | 0.082 (0.074)       | 2.7x10 <sup>-01</sup> |
| <i>CHMP4B</i>   | 20q11.22              | 27         | 0.18                 | 0.095 (0.042)               | 2.4x10 <sup>-02</sup> | -0.049 (0.050)         | 3.3x10 <sup>-01</sup> | 0.036 (0.032)       | 2.7x10 <sup>-01</sup> |
| <i>ZCCHC24</i>  | 10q22.3               | 16         | 0.044                | -0.19 (0.084)               | 2.5x10 <sup>-02</sup> | 0.11 (0.11)            | 2.8x10 <sup>-01</sup> | -0.072 (0.066)      | 2.7x10 <sup>-01</sup> |
| <i>HLA-C</i>    | 6p21.33               | 104        | 0.67                 | -0.048 (0.022)              | 2.7x10 <sup>-02</sup> | 0.021 (0.024)          | 3.9x10 <sup>-01</sup> | -0.018 (0.016)      | 2.8x10 <sup>-01</sup> |
| <i>VANGL1</i>   | 1p13.1                | 68         | 0.16                 | -0.074 (0.036)              | 4.1x10 <sup>-02</sup> | 0.042 (0.047)          | 3.8x10 <sup>-01</sup> | -0.031 (0.029)      | 2.8x10 <sup>-01</sup> |
| <i>MAL</i>      | 2q11.1                | 16         | 0.025                | 0.26 (0.11)                 | 1.5x10 <sup>-02</sup> | -0.19 (0.13)           | 1.6x10 <sup>-01</sup> | 0.087 (0.083)       | 2.9x10 <sup>-01</sup> |
| <i>PROM2</i>    | 2q11.1                | 7          | 0.0094               | -0.40 (0.16)                | 1.6x10 <sup>-02</sup> | 0.29 (0.21)            | 1.7x10 <sup>-01</sup> | -0.14 (0.13)        | 2.9x10 <sup>-01</sup> |
| <i>DNMT3A</i>   | 2p23.3                | 18         | 0.085                | -0.13 (0.054)               | 1.8x10 <sup>-02</sup> | 0.11 (0.074)           | 1.5x10 <sup>-01</sup> | -0.046 (0.044)      | 2.9x10 <sup>-01</sup> |
| <i>SMC6</i>     | 2p24.2                | 15         | 0.01                 | 0.28 (0.14)                 | 3.9x10 <sup>-02</sup> | -0.16 (0.17)           | 3.6x10 <sup>-01</sup> | 0.11 (0.11)         | 2.9x10 <sup>-01</sup> |
| <i>RPP14</i>    | 3p14.3                | 27         | 0.11                 | -0.18 (0.062)               | 4.6x10 <sup>-03</sup> | 0.088 (0.063)          | 1.6x10 <sup>-01</sup> | -0.046 (0.044)      | 3.0x10 <sup>-01</sup> |
| <i>CALML6</i>   | 1p36.33               | 27         | 0.1                  | 0.12 (0.056)                | 3.1x10 <sup>-02</sup> | -0.064 (0.067)         | 3.4x10 <sup>-01</sup> | 0.045 (0.043)       | 3.0x10 <sup>-01</sup> |
| <i>SNx10</i>    | 7p15.2                | 3          | 0.006                | 0.78 (0.36)                 | 3.2x10 <sup>-02</sup> | -0.43 (0.44)           | 3.3x10 <sup>-01</sup> | 0.29 (0.28)         | 3.0x10 <sup>-01</sup> |
| <i>PARN</i>     | 16p13.12              | 4          | 0.014                | -0.42 (0.20)                | 3.4x10 <sup>-02</sup> | 0.44 (0.31)            | 1.6x10 <sup>-01</sup> | -0.17 (0.17)        | 3.0x10 <sup>-01</sup> |
| <i>STAC</i>     | 3p22.3                | 66         | 0.087                | 0.11 (0.051)                | 3.8x10 <sup>-02</sup> | -0.059 (0.064)         | 3.5x10 <sup>-01</sup> | 0.042 (0.040)       | 3.0x10 <sup>-01</sup> |
| <i>C16orf79</i> | 16p13.3               | 39         | 0.11                 | -0.11 (0.047)               | 2.4x10 <sup>-02</sup> | 0.071 (0.059)          | 2.3x10 <sup>-01</sup> | -0.038 (0.037)      | 3.1x10 <sup>-01</sup> |
| <i>GATSL3</i>   | 22q12.2               | 17         | 0.26                 | -0.069 (0.032)              | 2.9x10 <sup>-02</sup> | 0.050 (0.042)          | 2.3x10 <sup>-01</sup> | -0.026 (0.025)      | 3.1x10 <sup>-01</sup> |
| <i>MYBPC2</i>   | 19q13.33              | 20         | 0.0093               | 0.25 (0.12)                 | 3.9x10 <sup>-02</sup> | -0.22 (0.18)           | 2.2x10 <sup>-01</sup> | 0.10 (0.10)         | 3.1x10 <sup>-01</sup> |
| <i>JHDM1D</i>   | 7q34                  | 18         | 0.032                | 0.24 (0.11)                 | 2.1x10 <sup>-02</sup> | -0.19 (0.14)           | 1.6x10 <sup>-01</sup> | 0.083 (0.084)       | 3.2x10 <sup>-01</sup> |
| <i>RBBP6</i>    | 16p12.1               | 59         | 0.37                 | -0.074 (0.032)              | 2.3x10 <sup>-02</sup> | 0.028 (0.032)          | 3.8x10 <sup>-01</sup> | -0.022 (0.023)      | 3.3x10 <sup>-01</sup> |

| Gene            | Location <sup>a</sup> | # SNPs in  | Imputation           | Discovery U4C Meta-analysis |                       | UK Biobank Replication |                       | Joint Meta-analysis |                       |
|-----------------|-----------------------|------------|----------------------|-----------------------------|-----------------------|------------------------|-----------------------|---------------------|-----------------------|
|                 |                       | Prediction | Quality <sup>b</sup> | Beta (SE)                   | p-value               | Beta (SE)              | p-value               | Beta (SE)           | p-value               |
| <i>MIA</i>      | 19q13.2               | 9          | 0.0048               | -0.44 (0.22)                | 4.5x10 <sup>-02</sup> | 0.56 (0.37)            | 1.3x10 <sup>-01</sup> | -0.18 (0.19)        | 3.3x10 <sup>-01</sup> |
| <i>RGPD4</i>    | 2q12.3                | 21         | 0.67                 | -0.051 (0.021)              | 1.8x10 <sup>-02</sup> | 0.029 (0.024)          | 2.2x10 <sup>-01</sup> | -0.015 (0.016)      | 3.4x10 <sup>-01</sup> |
| <i>TCERG1</i>   | 5q32                  | 19         | 0.016                | 0.31 (0.14)                 | 2.5x10 <sup>-02</sup> | -0.13 (0.14)           | 3.6x10 <sup>-01</sup> | 0.093 (0.098)       | 3.4x10 <sup>-01</sup> |
| <i>FBXO44</i>   | 1p36.22               | 39         | 0.31                 | -0.083 (0.035)              | 1.9x10 <sup>-02</sup> | 0.049 (0.040)          | 2.2x10 <sup>-01</sup> | -0.025 (0.026)      | 3.5x10 <sup>-01</sup> |
| <i>SIPA1</i>    | 11q13.1               | 21         | 0.037                | 0.17 (0.079)                | 2.9x10 <sup>-02</sup> | -0.15 (0.11)           | 1.7x10 <sup>-01</sup> | 0.059 (0.064)       | 3.5x10 <sup>-01</sup> |
| <i>STX4</i>     | 16p11.2               | 14         | 0.12                 | -0.12 (0.057)               | 3.1x10 <sup>-02</sup> | 0.057 (0.061)          | 3.5x10 <sup>-01</sup> | -0.039 (0.042)      | 3.5x10 <sup>-01</sup> |
| <i>SCP2</i>     | 1p32.3                | 44         | 0.15                 | 0.093 (0.043)               | 3.2x10 <sup>-02</sup> | -0.083 (0.060)         | 1.6x10 <sup>-01</sup> | 0.032 (0.035)       | 3.6x10 <sup>-01</sup> |
| <i>SNX1</i>     | 15q22.31              | 17         | 0.19                 | -0.099 (0.044)              | 2.6x10 <sup>-02</sup> | 0.064 (0.052)          | 2.2x10 <sup>-01</sup> | -0.030 (0.034)      | 3.7x10 <sup>-01</sup> |
| <i>ZSWIM1</i>   | 20q13.12              | 17         | 0.0082               | -0.34 (0.14)                | 1.3x10 <sup>-02</sup> | 0.44 (0.20)            | 3.1x10 <sup>-02</sup> | -0.097 (0.11)       | 4.0x10 <sup>-01</sup> |
| <i>UBR2</i>     | 6p21.1                | 3          | 0.023                | 0.45 (0.23)                 | 4.5x10 <sup>-02</sup> | -0.14 (0.20)           | 5.0x10 <sup>-01</sup> | 0.13 (0.15)         | 4.0x10 <sup>-01</sup> |
| <i>HIST1H3D</i> | 6p22.2                | 15         | 0.02                 | 0.28 (0.14)                 | 4.5x10 <sup>-02</sup> | -0.18 (0.16)           | 2.8x10 <sup>-01</sup> | 0.087 (0.11)        | 4.2x10 <sup>-01</sup> |
| <i>ZNF805</i>   | 19q13.43              | 19         | 0.059                | -0.18 (0.080)               | 2.8x10 <sup>-02</sup> | 0.14 (0.098)           | 1.5x10 <sup>-01</sup> | -0.049 (0.062)      | 4.3x10 <sup>-01</sup> |
| <i>DNAH6</i>    | 2p11.2                | 61         | 0.15                 | -0.098 (0.045)              | 3.1x10 <sup>-02</sup> | 0.076 (0.055)          | 1.7x10 <sup>-01</sup> | -0.028 (0.035)      | 4.3x10 <sup>-01</sup> |
| <i>STIM2</i>    | 4p15.2                | 51         | 0.1                  | 0.092 (0.045)               | 4.0x10 <sup>-02</sup> | -0.079 (0.057)         | 1.6x10 <sup>-01</sup> | 0.026 (0.035)       | 4.5x10 <sup>-01</sup> |
| <i>HIST1H4D</i> | 6p22.2                | 4          | 0.0094               | 0.50 (0.23)                 | 2.7x10 <sup>-02</sup> | -0.49 (0.30)           | 1.0x10 <sup>-01</sup> | 0.13 (0.18)         | 4.6x10 <sup>-01</sup> |
| <i>BCKDK</i>    | 16p11.2               | 16         | 0.081                | 0.16 (0.074)                | 3.1x10 <sup>-02</sup> | -0.082 (0.074)         | 2.7x10 <sup>-01</sup> | 0.038 (0.053)       | 4.6x10 <sup>-01</sup> |
| <i>TTC30A</i>   | 2q31.2                | 26         | 0.015                | 0.27 (0.14)                 | 4.3x10 <sup>-02</sup> | -0.24 (0.17)           | 1.7x10 <sup>-01</sup> | 0.079 (0.11)        | 4.6x10 <sup>-01</sup> |
| <i>TMEM206</i>  | 1q32.3                | 21         | 0.096                | 0.15 (0.061)                | 1.6x10 <sup>-02</sup> | -0.14 (0.075)          | 6.7x10 <sup>-02</sup> | 0.034 (0.047)       | 4.7x10 <sup>-01</sup> |
| <i>PGP</i>      | 16p13.3               | 6          | 0.099                | -0.13 (0.063)               | 3.3x10 <sup>-02</sup> | 0.12 (0.080)           | 1.3x10 <sup>-01</sup> | -0.036 (0.050)      | 4.7x10 <sup>-01</sup> |
| <i>SETD1A</i>   | 16p11.2               | 15         | 0.016                | -0.38 (0.16)                | 1.4x10 <sup>-02</sup> | 0.26 (0.17)            | 1.2x10 <sup>-01</sup> | -0.079 (0.11)       | 4.8x10 <sup>-01</sup> |
| <i>ARHGAP24</i> | 4q21.23               | 66         | 0.23                 | 0.078 (0.036)               | 3.2x10 <sup>-02</sup> | -0.059 (0.042)         | 1.6x10 <sup>-01</sup> | 0.019 (0.027)       | 4.8x10 <sup>-01</sup> |
| <i>STAM</i>     | 10p12.33              | 3          | 0.023                | -0.37 (0.18)                | 3.8x10 <sup>-02</sup> | 0.29 (0.21)            | 1.7x10 <sup>-01</sup> | -0.095 (0.14)       | 4.8x10 <sup>-01</sup> |
| <i>KSR1</i>     | 17q11.1               | 29         | 0.24                 | 0.060 (0.030)               | 4.7x10 <sup>-02</sup> | -0.062 (0.041)         | 1.2x10 <sup>-01</sup> | 0.017 (0.024)       | 4.9x10 <sup>-01</sup> |
| <i>EGLN3</i>    | 14q13.1               | 66         | 0.11                 | -0.085 (0.044)              | 5.0x10 <sup>-02</sup> | 0.083 (0.056)          | 1.4x10 <sup>-01</sup> | -0.022 (0.034)      | 5.2x10 <sup>-01</sup> |
| <i>GDF11</i>    | 12q13.2               | 40         | 0.033                | 0.18 (0.074)                | 1.7x10 <sup>-02</sup> | -0.16 (0.087)          | 6.4x10 <sup>-02</sup> | 0.035 (0.056)       | 5.4x10 <sup>-01</sup> |
| <i>RPS2</i>     | 16p13.3               | 12         | 0.31                 | -0.078 (0.038)              | 3.8x10 <sup>-02</sup> | 0.049 (0.039)          | 2.1x10 <sup>-01</sup> | -0.016 (0.027)      | 5.4x10 <sup>-01</sup> |
| <i>KCNS1</i>    | 20q13.12              | 18         | 0.044                | -0.24 (0.12)                | 4.2x10 <sup>-02</sup> | 0.14 (0.12)            | 2.5x10 <sup>-01</sup> | -0.051 (0.083)      | 5.4x10 <sup>-01</sup> |

| Gene           | Location <sup>a</sup> | # SNPs in Prediction | Imputation Quality <sup>b</sup> | Discovery U4C Meta-analysis |                       | UK Biobank Replication |                       | Joint Meta-analysis |                       |
|----------------|-----------------------|----------------------|---------------------------------|-----------------------------|-----------------------|------------------------|-----------------------|---------------------|-----------------------|
|                |                       |                      |                                 | Beta (SE)                   | p-value               | Beta (SE)              | p-value               | Beta (SE)           | p-value               |
| <i>GIMAP4</i>  | 7q36.1                | 67                   | 0.08                            | -0.12 (0.061)               | 4.6x10 <sup>-02</sup> | 0.097 (0.070)          | 1.7x10 <sup>-01</sup> | -0.028 (0.046)      | 5.5x10 <sup>-01</sup> |
| <i>MAP3K8</i>  | 10p11.23              | 59                   | 0.034                           | -0.13 (0.065)               | 3.9x10 <sup>-02</sup> | 0.15 (0.085)           | 8.4x10 <sup>-02</sup> | -0.031 (0.052)      | 5.6x10 <sup>-01</sup> |
| <i>ADCY10</i>  | 1q24.2                | 39                   | 0.0056                          | -0.30 (0.15)                | 4.5x10 <sup>-02</sup> | 0.30 (0.19)            | 1.1x10 <sup>-01</sup> | -0.068 (0.12)       | 5.6x10 <sup>-01</sup> |
| <i>PCTP</i>    | 17q22                 | 40                   | 0.23                            | -0.078 (0.035)              | 2.8x10 <sup>-02</sup> | 0.11 (0.051)           | 3.0x10 <sup>-02</sup> | -0.016 (0.029)      | 5.7x10 <sup>-01</sup> |
| <i>C3orf23</i> | 3p21.31               | 9                    | 0.053                           | -0.18 (0.089)               | 4.2x10 <sup>-02</sup> | 0.19 (0.11)            | 9.6x10 <sup>-02</sup> | -0.040 (0.070)      | 5.7x10 <sup>-01</sup> |
| <i>NCF2</i>    | 1q25.3                | 67                   | 0.02                            | -0.13 (0.066)               | 5.0x10 <sup>-02</sup> | 0.14 (0.086)           | 1.1x10 <sup>-01</sup> | -0.030 (0.053)      | 5.7x10 <sup>-01</sup> |
| <i>MCMBP</i>   | 10q26.11              | 77                   | 0.19                            | 0.093 (0.043)               | 3.0x10 <sup>-02</sup> | -0.063 (0.044)         | 1.5x10 <sup>-01</sup> | 0.017 (0.031)       | 5.8x10 <sup>-01</sup> |
| <i>EBF4</i>    | 20p13                 | 48                   | 0.35                            | -0.072 (0.029)              | 1.4x10 <sup>-02</sup> | 0.088 (0.038)          | 2.0x10 <sup>-02</sup> | -0.012 (0.023)      | 6.0x10 <sup>-01</sup> |
| <i>FAM83H</i>  | 8q24.3                | 15                   | 0.046                           | -0.17 (0.081)               | 4.0x10 <sup>-02</sup> | 0.18 (0.10)            | 7.4x10 <sup>-02</sup> | -0.033 (0.063)      | 6.0x10 <sup>-01</sup> |
| <i>TPM2</i>    | 9p13.3                | 23                   | 0.54                            | 0.051 (0.025)               | 4.0x10 <sup>-02</sup> | -0.042 (0.027)         | 1.2x10 <sup>-01</sup> | 0.009 (0.018)       | 6.3x10 <sup>-01</sup> |
| <i>NAV2</i>    | 11p15.1               | 10                   | 0.035                           | -0.28 (0.12)                | 1.9x10 <sup>-02</sup> | 0.34 (0.15)            | 2.5x10 <sup>-02</sup> | -0.041 (0.093)      | 6.6x10 <sup>-01</sup> |
| <i>PFN2</i>    | 3q25.1                | 46                   | 0.39                            | -0.059 (0.029)              | 4.0x10 <sup>-02</sup> | 0.056 (0.033)          | 8.6x10 <sup>-02</sup> | -0.009 (0.022)      | 6.8x10 <sup>-01</sup> |
| <i>AURKC</i>   | 19q13.43              | 48                   | 0.086                           | 0.11 (0.053)                | 4.6x10 <sup>-02</sup> | -0.13 (0.067)          | 6.2x10 <sup>-02</sup> | 0.017 (0.042)       | 6.9x10 <sup>-01</sup> |
| <i>ZNF425</i>  | 7q36.1                | 27                   | 0.28                            | 0.069 (0.033)               | 3.6x10 <sup>-02</sup> | -0.076 (0.039)         | 5.4x10 <sup>-02</sup> | 0.010 (0.025)       | 7.0x10 <sup>-01</sup> |
| <i>SPINT2</i>  | 19q13.2               | 39                   | 0.091                           | 0.099 (0.050)               | 4.5x10 <sup>-02</sup> | -0.13 (0.065)          | 4.1x10 <sup>-02</sup> | 0.014 (0.039)       | 7.3x10 <sup>-01</sup> |
| <i>SCGB3A2</i> | 5q32                  | 48                   | 0.53                            | -0.047 (0.024)              | 4.6x10 <sup>-02</sup> | 0.083 (0.028)          | 3.3x10 <sup>-03</sup> | 0.006 (0.018)       | 7.3x10 <sup>-01</sup> |
| <i>HLA-B</i>   | 6p21.33               | 84                   | 0.54                            | 0.041 (0.021)               | 4.6x10 <sup>-02</sup> | -0.049 (0.025)         | 5.3x10 <sup>-02</sup> | 0.005 (0.016)       | 7.5x10 <sup>-01</sup> |
| <i>NUB1</i>    | 7q36.1                | 18                   | 0.048                           | -0.20 (0.097)               | 4.1x10 <sup>-02</sup> | 0.22 (0.11)            | 5.1x10 <sup>-02</sup> | -0.021 (0.074)      | 7.8x10 <sup>-01</sup> |
| <i>DACT3</i>   | 19q13.32              | 16                   | 0.12                            | -0.11 (0.053)               | 4.0x10 <sup>-02</sup> | 0.13 (0.062)           | 4.4x10 <sup>-02</sup> | -0.011 (0.040)      | 7.9x10 <sup>-01</sup> |
| <i>TMEM98</i>  | 17q11.2               | 56                   | 0.51                            | -0.058 (0.028)              | 3.7x10 <sup>-02</sup> | 0.047 (0.027)          | 7.9x10 <sup>-02</sup> | -0.004 (0.019)      | 8.5x10 <sup>-01</sup> |
| <i>FCF1</i>    | 14q24.3               | 15                   | 0.01                            | 0.44 (0.18)                 | 1.8x10 <sup>-02</sup> | -0.71 (0.24)           | 3.4x10 <sup>-03</sup> | 0.017 (0.15)        | 9.1x10 <sup>-01</sup> |
| <i>SACM1L</i>  | 3p21.31               | 40                   | 0.21                            | 0.086 (0.043)               | 4.5x10 <sup>-02</sup> | -0.11 (0.049)          | 3.1x10 <sup>-02</sup> | 0.002 (0.032)       | 9.4x10 <sup>-01</sup> |
| <i>RPS6KL1</i> | 14q24.3               | 13                   | 0.29                            | 0.087 (0.033)               | 8.4x10 <sup>-03</sup> | -0.12 (0.039)          | 2.4x10 <sup>-03</sup> | 0.001 (0.025)       | 9.6x10 <sup>-01</sup> |

Abbreviations: SE: standard error; SNP: single nucleotide polymorphism; U4C: Up for a Challenge

<sup>a</sup> According to human reference genome GRCh37/hg19

<sup>b</sup> R<sup>2</sup> estimate derived from 10-fold cross-validation of true gene expression and predicted gene expression
