# Supplementary material for: Cis-eQTL-based trans-ethnic meta-analysis reveals novel genes associated with breast cancer risk
Source: PubMed Central journal article supplement (PMC5391966; doi:10.1371/journal.pgen.1006690), 2017-03-31
Supplement: pgen.1006690.s002.pdf [file pgen.1006690.s002.pdf]

**(A) RCCD1 at 15q26.1 (Breast Tissue)**

| SNP        | Alleles <sup>a</sup> | Proportion of Weight <sup>b</sup> | Discovery U4C Meta-analysis |                   |                       | UK Biobank Replication |                  |                       | Joint Meta-analysis |                       |
|------------|----------------------|-----------------------------------|-----------------------------|-------------------|-----------------------|------------------------|------------------|-----------------------|---------------------|-----------------------|
|            |                      |                                   | EAF <sup>c</sup>            | OR (95% CI)       | p-value               | EAF <sup>c</sup>       | OR (95% CI)      | p-value               | OR (95% CI)         | p-value               |
| rs3826033  | G / A                | 0.13                              | 0.32                        | 0.92 (0.88, 0.98) | 4.1x10 <sup>-03</sup> | 0.13                   | 0.86 (0.79,0.93) | 2.3x10 <sup>-04</sup> | 0.90 (0.86,0.94)    | 9.5x10 <sup>-06</sup> |
| rs2290202  | G / T                | 0.24                              | 0.3                         | 0.93 (0.89, 0.98) | 5.3x10 <sup>-03</sup> | 0.13                   | 0.86 (0.79,0.93) | 1.9x10 <sup>-04</sup> | 0.91 (0.88,0.95)    | 1.7x10 <sup>-05</sup> |
| rs4347602  | A / C                | 0.025                             | 0.72                        | 0.94 (0.90,0.98)  | 6.5x10 <sup>-03</sup> | 0.77                   | 0.96 (0.90,1.02) | 1.6x10 <sup>-01</sup> | 0.94 (0.91,0.98)    | 2.4x10 <sup>-03</sup> |
| rs11207    | C / T                | 0.030                             | 0.35                        | 0.97 (0.93, 1.02) | 2.1x10 <sup>-01</sup> | 0.24                   | 0.93 (0.87,0.98) | 1.5x10 <sup>-02</sup> | 0.96 (0.93,0.99)    | 1.6x10 <sup>-02</sup> |
| rs12907681 | C / T                | 0.0045                            | 0.15                        | 0.96 (0.90, 1.02) | 1.6x10 <sup>-01</sup> | 0.03                   | 0.88 (0.75,1.03) | 1.2x10 <sup>-01</sup> | 0.94 (0.89,1.00)    | 5.8x10 <sup>-02</sup> |
| rs756874   | A / G                | 0.034                             | 0.36                        | 0.98 (0.93,1.03)  | 4.6x10 <sup>-01</sup> | 0.35                   | 0.96 (0.90,1.01) | 1.1x10 <sup>-01</sup> | 0.97 (0.93,1.01)    | 1.1x10 <sup>-01</sup> |
| rs17595461 | A / G                | 0.0065                            | 0.40                        | 0.98 (0.93,1.02)  | 2.5x10 <sup>-01</sup> | 0.35                   | 0.97 (0.92,1.03) | 3.2x10 <sup>-01</sup> | 0.97 (0.94,1.01)    | 1.3x10 <sup>-01</sup> |
| rs2444061  | T / G                | 0.0078                            | 0.44                        | 1.04 (1.00,1.09)  | 7.1x10 <sup>-02</sup> | 0.13                   | 0.99 (0.92,1.07) | 7.8x10 <sup>-01</sup> | 1.03 (0.99,1.06)    | 1.4x10 <sup>-01</sup> |
| rs2601166  | G / A                | 0.0053                            | 0.43                        | 1.04 (1.00, 1.08) | 7.3x10 <sup>-02</sup> | 0.13                   | 0.99 (0.91,1.07) | 7.6x10 <sup>-01</sup> | 1.03 (0.99,1.07)    | 1.5x10 <sup>-01</sup> |
| rs7184015  | T / G                | <0.001                            | 0.48                        | 1.01 (0.97,1.06)  | 5.4x10 <sup>-01</sup> | 0.74                   | 1.05 (0.99,1.11) | 1.2x10 <sup>-01</sup> | 1.03 (0.99,1.06)    | 1.5x10 <sup>-01</sup> |
| rs12912915 | G / A                | 0.028                             | 0.68                        | 0.98 (0.93, 1.02) | 3.4x10 <sup>-01</sup> | 0.65                   | 0.97 (0.92,1.03) | 2.8x10 <sup>-01</sup> | 0.97 (0.94,1.01)    | 1.5x10 <sup>-01</sup> |
| rs441399   | G / A                | 0.043                             | 0.52                        | 0.97 (0.93, 1.01) | 1.5x10 <sup>-01</sup> | 0.52                   | 1.00 (0.95,1.05) | 1.0e+00               | 0.98 (0.95,1.01)    | 2.6x10 <sup>-01</sup> |
| rs10444879 | T / C                | 0.038                             | 0.90                        | 0.99 (0.92,1.08)  | 8.8x10 <sup>-01</sup> | 0.86                   | 0.95 (0.88,1.03) | 2.2x10 <sup>-01</sup> | 0.97 (0.92,1.03)    | 3.2x10 <sup>-01</sup> |
| rs7496004  | A / G                | 0.045                             | 0.37                        | 1.02 (0.97,1.06)  | 4.5x10 <sup>-01</sup> | 0.34                   | 1.01 (0.96,1.07) | 6.6x10 <sup>-01</sup> | 1.01 (0.98,1.05)    | 3.8x10 <sup>-01</sup> |
| rs7164810  | G / A                | 0.057                             | 0.084                       | 0.96 (0.86, 1.06) | 4.1x10 <sup>-01</sup> | -                      | -                | -                     | 0.96 (0.86,1.06)    | 4.1x10 <sup>-01</sup> |
| rs3862439  | G / T                | 0.035                             | 0.055                       | 0.98 (0.86, 1.11) | 7.4x10 <sup>-01</sup> | 0.07                   | 1.07 (0.96,1.18) | 2.1x10 <sup>-01</sup> | 1.03 (0.95,1.11)    | 4.4x10 <sup>-01</sup> |
| rs4932525  | C / T                | 0.0016                            | 0.74                        | 0.99 (0.94, 1.04) | 5.5x10 <sup>-01</sup> | 0.59                   | 0.99 (0.94,1.04) | 6.8x10 <sup>-01</sup> | 0.99 (0.95,1.02)    | 4.7x10 <sup>-01</sup> |
| rs17832339 | G / T                | 0.027                             | 0.027                       | 1.04 (0.88, 1.23) | 6.6x10 <sup>-01</sup> | 0.04                   | 0.92 (0.8,1.06)  | 2.4x10 <sup>-01</sup> | 0.97 (0.87,1.08)    | 5.4x10 <sup>-01</sup> |
| rs8032568  | T / C                | 0.041                             | 0.50                        | 1.00 (0.96,1.05)  | 8.7x10 <sup>-01</sup> | 0.43                   | 0.97 (0.92,1.03) | 3.5x10 <sup>-01</sup> | 0.99 (0.96,1.03)    | 6.5x10 <sup>-01</sup> |
| rs11639135 | T / C                | 0.024                             | 0.52                        | 1.03 (0.99,1.06)  | 2.0x10 <sup>-01</sup> | 0.58                   | 0.97 (0.92,1.02) | 2.7x10 <sup>-01</sup> | 1.01 (0.97,1.04)    | 7.0x10 <sup>-01</sup> |
| rs2285625  | T / C                | 0.0061                            | 0.43                        | 1.01 (0.96,1.05)  | 7.1x10 <sup>-01</sup> | 0.30                   | 0.97 (0.92,1.03) | 3.3x10 <sup>-01</sup> | 0.99 (0.96,1.03)    | 7.6x10 <sup>-01</sup> |
| rs12906053 | T / C                | 0.0028                            | 0.89                        | 0.98 (0.92,1.05)  | 5.7x10 <sup>-01</sup> | 0.90                   | 1.05 (0.97,1.15) | 2.4x10 <sup>-01</sup> | 1.01 (0.95,1.06)    | 8.0x10 <sup>-01</sup> |
| rs17821347 | A / G                | 0.16                              | 0.07                        | 1.10 (0.96,1.25)  | 1.8x10 <sup>-01</sup> | 0.04                   | 0.92 (0.8,1.06)  | 2.3x10 <sup>-01</sup> | 1.01 (0.92,1.11)    | 8.9x10 <sup>-01</sup> |
| rs7176401  | G / A                | 0.0057                            | 0.52                        | 1.01 (0.97, 1.06) | 5.9x10 <sup>-01</sup> | 0.46                   | 0.98 (0.93,1.04) | 5.9x10 <sup>-01</sup> | 1.00 (0.97,1.04)    | 9.5x10 <sup>-01</sup> |

**(B) DHODH at 16q22.2 (Breast Tissue)**

| SNP        | Alleles <sup>a</sup> | Proportion of Weight <sup>b</sup> | Discovery U4C Meta-analysis |                  |                       | UK Biobank Replication |                  |                       | Joint Meta-analysis |                       |
|------------|----------------------|-----------------------------------|-----------------------------|------------------|-----------------------|------------------------|------------------|-----------------------|---------------------|-----------------------|
|            |                      |                                   | EAFC                        | OR (95% CI)      | p-value               | EAFC                   | OR (95% CI)      | p-value               | OR (95% CI)         | p-value               |
| rs3213422  | C / A                | 0.56                              | 0.42                        | 0.92 (0.88,0.96) | 2.8x10 <sup>-05</sup> | 0.48                   | 0.95 (0.90,1.00) | 3.9x10 <sup>-02</sup> | 0.93 (0.90,0.96)    | 4.5x10 <sup>-06</sup> |
| rs2240243  | G / A                | 0.055                             | 0.47                        | 0.93 (0.89,0.97) | 2.7x10 <sup>-04</sup> | 0.34                   | 0.98 (0.93,1.04) | 5.3x10 <sup>-01</sup> | 0.95 (0.92,0.98)    | 1.0x10 <sup>-03</sup> |
| rs12708928 | C / A                | 0.019                             | 0.47                        | 0.93 (0.89,0.96) | 2.5x10 <sup>-04</sup> | 0.34                   | 0.99 (0.93,1.04) | 5.9x10 <sup>-01</sup> | 0.95 (0.92,0.98)    | 1.2x10 <sup>-03</sup> |
| rs11640722 | T / C                | 0.097                             | 0.88                        | 0.93 (0.97,1.01) | 8.9x10 <sup>-02</sup> | 0.84                   | 0.96 (0.89,1.04) | 3.2x10 <sup>-01</sup> | 0.95 (0.90,1.00)    | 6.0x10 <sup>-02</sup> |
| rs7190257  | G / T                | 0.16                              | 0.89                        | 0.99 (0.92,1.06) | 7.9x10 <sup>-01</sup> | 0.83                   | 1.00 (0.93,1.07) | 8.9x10 <sup>-01</sup> | 0.99 (0.95,1.04)    | 7.7x10 <sup>-01</sup> |
| rs7404992  | C / T                | 0.046                             | 0.25                        | 1.00 (0.95,1.05) | 9.0x10 <sup>-01</sup> | 0.06                   | 1.04 (0.93,1.16) | 4.9x10 <sup>-01</sup> | 1.00 (0.96,1.05)    | 8.6x10 <sup>-01</sup> |
| rs9923937  | T / C                | 0.069                             | 0.09                        | 1.03 (0.95,1.10) | 4.7x10 <sup>-01</sup> | 0.05                   | 0.95 (0.84,1.07) | 3.7x10 <sup>-01</sup> | 1.00 (0.94,1.06)    | 8.9x10 <sup>-01</sup> |

**(C) ANKLE1 at 19p13.11 (Breast Tissue)**

| SNP        | Alleles <sup>a</sup> | Proportion of Weight <sup>b</sup> | Discovery U4C Meta-analysis |                  |                       | UK Biobank Replication |                  |                       | Joint Meta-analysis |                       |
|------------|----------------------|-----------------------------------|-----------------------------|------------------|-----------------------|------------------------|------------------|-----------------------|---------------------|-----------------------|
|            |                      |                                   | EAFC                        | OR (95% CI)      | p-value               | EAFC                   | OR (95% CI)      | p-value               | OR (95% CI)         | p-value               |
| rs34084277 | A / G                | 0.23                              | 0.19                        | 1.09 (1.02,1.15) | 7.1x10 <sup>-03</sup> | 0.19                   | 1.11 (1.04,1.18) | 2.0x10 <sup>-03</sup> | 1.10 (1.05,1.14)    | 4.7x10 <sup>-05</sup> |
| rs8170     | G / A                | 0.26                              | 0.19                        | 1.08 (1.02,1.15) | 7.2x10 <sup>-03</sup> | 0.19                   | 1.11 (1.04,1.18) | 2.6x10 <sup>-03</sup> | 1.09 (1.05,1.14)    | 6.3x10 <sup>-05</sup> |
| rs3745162  | T / G                | 0.24                              | 0.81                        | 1.00 (0.94,1.05) | 9.4x10 <sup>-01</sup> | 0.92                   | 1.12 (1.01,1.24) | 2.9x10 <sup>-02</sup> | 1.02 (0.98,1.08)    | 3.2x10 <sup>-01</sup> |
| rs10409801 | A / G                | 0.11                              | 0.71                        | 1.01 (0.95,1.06) | 8.5x10 <sup>-01</sup> | 0.86                   | 1.04 (0.96,1.12) | 3.3x10 <sup>-01</sup> | 1.02 (0.97,1.06)    | 4.8x10 <sup>-01</sup> |
| rs2450831  | T / C                | 0.15                              | 0.45                        | 0.99 (0.94,1.04) | 6.8x10 <sup>-01</sup> | 0.17                   | 1.05 (0.98,1.13) | 1.7x10 <sup>-01</sup> | 1.01 (0.97,1.05)    | 6.5x10 <sup>-01</sup> |
| rs12983375 | C / T                | 0.017                             | 0.42                        | 1.00 (0.96,1.04) | 9.4x10 <sup>-01</sup> | 0.38                   | 0.99 (0.94,1.04) | 7.3x10 <sup>-01</sup> | 1.00 (0.97,1.03)    | 8.9x10 <sup>-01</sup> |

**(D) RCCD1 at 15q26.1 (Whole Blood)**

| SNP        | Alleles <sup>a</sup> | Proportion of Weight <sup>b</sup> | Discovery U4C Meta-analysis |                  |                       | UK Biobank Replication |                  |                       | Joint Meta-analysis |                       |
|------------|----------------------|-----------------------------------|-----------------------------|------------------|-----------------------|------------------------|------------------|-----------------------|---------------------|-----------------------|
|            |                      |                                   | EAFC <sup>c</sup>           | OR (95% CI)      | p-value               | EAFC <sup>c</sup>      | OR (95% CI)      | p-value               | OR (95% CI)         | p-value               |
| rs3826033  | G / A                | 0.33                              | 0.32                        | 0.92 (0.88,0.98) | 4.1x10 <sup>-03</sup> | 0.13                   | 0.86 (0.79,0.93) | 2.3x10 <sup>-04</sup> | 0.90 (0.86,0.94)    | 9.5x10 <sup>-06</sup> |
| rs2290202  | G / T                | 0.29                              | 0.3                         | 0.93 (0.89,0.98) | 5.3x10 <sup>-03</sup> | 0.13                   | 0.86 (0.79,0.93) | 1.9x10 <sup>-04</sup> | 0.91 (0.88,0.95)    | 1.7x10 <sup>-05</sup> |
| rs7180016  | G / A                | 0.012                             | 0.49                        | 0.97 (0.93,1.01) | 1.3x10 <sup>-01</sup> | 0.16                   | 0.90 (0.84,0.97) | 5.7x10 <sup>-03</sup> | 0.95 (0.92,0.99)    | 7.3x10 <sup>-03</sup> |
| rs11073961 | A / G                | 0.049                             | 0.35                        | 0.97 (0.93,1.01) | 2.1x10 <sup>-01</sup> | 0.27                   | 0.92 (0.87,0.98) | 7.5x10 <sup>-03</sup> | 0.95 (0.93,0.99)    | 9.9x10 <sup>-03</sup> |
| rs11207    | C / T                | 0.0092                            | 0.35                        | 0.97 (0.93,1.02) | 2.1x10 <sup>-01</sup> | 0.24                   | 0.93 (0.87,0.98) | 1.5x10 <sup>-02</sup> | 0.96 (0.93,0.99)    | 1.6x10 <sup>-02</sup> |
| rs2285937  | A / G                | 0.0064                            | 0.46                        | 0.98 (0.94,1.02) | 3.1x10 <sup>-01</sup> | 0.16                   | 0.90 (0.84,0.97) | 4.9x10 <sup>-03</sup> | 0.96 (0.93,0.99)    | 2.3x10 <sup>-02</sup> |
| rs3809583  | A / G                | 0.0035                            | 0.36                        | 0.97 (0.93,1.01) | 1.2x10 <sup>-01</sup> | 0.32                   | 0.96 (0.91,1.01) | 1.5x10 <sup>-01</sup> | 0.96 (0.93,1.00)    | 3.5x10 <sup>-02</sup> |
| rs1052532  | T / C                | 0.0056                            | 0.35                        | 0.99 (0.94,1.03) | 6.3x10 <sup>-01</sup> | 0.27                   | 0.92 (0.87,0.98) | 8.6x10 <sup>-03</sup> | 0.97 (0.93,1.00)    | 5.4x10 <sup>-02</sup> |
| rs7182610  | C / T                | <0.001                            | 0.85                        | 0.95 (0.90,1.01) | 8.6x10 <sup>-02</sup> | 0.91                   | 1.01 (0.92,1.10) | 8.1x10 <sup>-01</sup> | 0.97 (0.92,1.02)    | 1.9x10 <sup>-01</sup> |
| rs11073986 | C / T                | 0.032                             | 0.65                        | 1.01 (0.96,1.07) | 6.6x10 <sup>-01</sup> | 0.86                   | 1.04 (0.96,1.12) | 3.6x10 <sup>-01</sup> | 1.02 (0.98,1.07)    | 3.9x10 <sup>-01</sup> |
| rs11638027 | T / G                | 0.016                             | 0.89                        | 0.95 (0.89,1.02) | 2.0x10 <sup>-01</sup> | 0.86                   | 1.01 (0.94,1.09) | 7.4x10 <sup>-01</sup> | 0.98 (0.93,1.03)    | 4.6x10 <sup>-01</sup> |
| rs4273013  | G / A                | 0.011                             | 0.96                        | 1.01 (0.88,1.15) | 9.2x10 <sup>-01</sup> | 0.94                   | 0.96 (0.86,1.07) | 4.3x10 <sup>-01</sup> | 0.98 (0.90,1.06)    | 5.9x10 <sup>-01</sup> |
| rs12911192 | C / T                | 0.16                              | 0.94                        | 0.98 (0.87,1.11) | 7.6x10 <sup>-01</sup> | 0.93                   | 0.98 (0.88,1.08) | 6.8x10 <sup>-01</sup> | 0.98 (0.91,1.06)    | 6.1x10 <sup>-01</sup> |
| rs1266479  | T / C                | 0.062                             | 0.73                        | 0.99 (0.93,1.05) | 7.4x10 <sup>-01</sup> | 0.92                   | 0.98 (0.89,1.08) | 6.6x10 <sup>-01</sup> | 0.99 (0.94,1.04)    | 6.1x10 <sup>-01</sup> |
| rs13380179 | G / A                | 0.0026                            | 0.28                        | 0.99 (0.93,1.04) | 5.8x10 <sup>-01</sup> | 0.15                   | 1.05 (0.97,1.13) | 2.1x10 <sup>-01</sup> | 1.01 (0.96,1.05)    | 7.7x10 <sup>-01</sup> |
| rs7177165  | T / C                | 0.0022                            | 0.64                        | 1.02 (0.97,1.06) | 4.1x10 <sup>-01</sup> | 0.71                   | 0.96 (0.91,1.02) | 2.0x10 <sup>-01</sup> | 1.00 (0.96,1.03)    | 9.2x10 <sup>-01</sup> |
| rs4932304  | C / T                | 0.0026                            | 0.28                        | 0.97 (0.92,1.03) | 3.5x10 <sup>-01</sup> | 0.14                   | 1.04 (0.97,1.12) | 2.6x10 <sup>-01</sup> | 1.00 (0.96,1.04)    | 9.4x10 <sup>-01</sup> |
| rs4932305  | G / A                | <0.001                            | 0.28                        | 0.98 (0.92,1.03) | 3.8x10 <sup>-01</sup> | 0.14                   | 1.04 (0.97,1.12) | 2.6x10 <sup>-01</sup> | 1.00 (0.96,1.04)    | 9.8x10 <sup>-01</sup> |
| rs3751658  | C / A                | 0.0034                            | 0.28                        | 0.98 (0.92,1.03) | 3.9x10 <sup>-01</sup> | 0.14                   | 1.04 (0.97,1.12) | 2.6x10 <sup>-01</sup> | 1.00 (0.96,1.04)    | 9.9x10 <sup>-01</sup> |
| rs12441424 | A / G                | 0.0031                            | 0.56                        | 0.99 (0.95,1.03) | 6.2x10 <sup>-01</sup> | 0.74                   | 1.02 (0.96,1.08) | 4.7x10 <sup>-01</sup> | 1.00 (0.97,1.03)    | 9.9x10 <sup>-01</sup> |

**(E) ACAP1 at 17p13.1 (Whole Blood)**

| SNP        | Alleles <sup>a</sup> | Proportion of Weight <sup>b</sup> | Discovery U4C Meta-analysis |                  |                       | UK Biobank Replication |                  |                       | Joint Meta-analysis |                       |
|------------|----------------------|-----------------------------------|-----------------------------|------------------|-----------------------|------------------------|------------------|-----------------------|---------------------|-----------------------|
|            |                      |                                   | EAFC <sup>c</sup>           | OR (95% CI)      | p-value               | EAFC <sup>c</sup>      | OR (95% CI)      | p-value               | OR (95% CI)         | p-value               |
| rs35776863 | A / G                | 0.49                              | 0.85                        | 1.08 (1.00,1.16) | 4.5x10 <sup>-02</sup> | 0.77                   | 1.11 (1.04,1.18) | 1.5x10 <sup>-01</sup> | 1.10 (1.04,1.15)    | 1.4x10 <sup>-04</sup> |
| rs9892383  | C / T                | 0.030                             | 0.76                        | 1.04 (0.98,1.09) | 1.7x10 <sup>-01</sup> | 0.73                   | 1.10 (1.03,1.18) | 7.6x10 <sup>-01</sup> | 1.06 (1.02,1.11)    | 3.6x10 <sup>-03</sup> |
| rs5412     | G / A                | 0.060                             | 0.12                        | 1.04 (0.97,1.12) | 2.6x10 <sup>-01</sup> | 0.17                   | 1.09 (1.02,1.17) | 1.2x10 <sup>-01</sup> | 1.07 (1.02,1.12)    | 8.0x10 <sup>-03</sup> |
| rs4791423  | A / C                | 0.0068                            | 0.45                        | 1.04 (1.00,1.09) | 3.3x10 <sup>-02</sup> | 0.34                   | 1.03 (0.98,1.09) | 5.5x10 <sup>-01</sup> | 1.04 (1.01,1.08)    | 1.8x10 <sup>-02</sup> |
| rs35721044 | T / C                | 0.031                             | 0.84                        | 1.11 (1.02,1.22) | 1.2x10 <sup>-02</sup> | 0.76                   | 1.03 (0.97,1.10) | 1.6x10 <sup>-01</sup> | 1.06 (1.01,1.12)    | 2.0x10 <sup>-02</sup> |
| rs4796302  | C / T                | <0.001                            | 0.30                        | 0.98 (0.94,1.02) | 3.8x10 <sup>-01</sup> | 0.39                   | 1.11 (1.06,1.17) | 3.0x10 <sup>-01</sup> | 1.03 (1.00,1.07)    | 5.4x10 <sup>-02</sup> |
| rs8081902  | A / G                | 0.012                             | 0.31                        | 0.98 (0.93,1.02) | 3.1x10 <sup>-01</sup> | 0.39                   | 1.11 (1.06,1.17) | 6.9x10 <sup>-01</sup> | 1.03 (1.00,1.06)    | 7.2x10 <sup>-02</sup> |
| rs8610     | G / A                | 0.060                             | 0.38                        | 1.00 (0.96,1.04) | 1.0x10 <sup>+00</sup> | 0.41                   | 1.07 (1.01,1.13) | 3.8x10 <sup>-01</sup> | 1.03 (0.99,1.06)    | 1.1x10 <sup>-01</sup> |
| rs3809827  | A / G                | 0.18                              | 0.44                        | 1.04 (1.00,1.10) | 7.2x10 <sup>-02</sup> | 0.25                   | 1.00 (0.94,1.07) | 5.6x10 <sup>-01</sup> | 1.03 (0.99,1.06)    | 1.5x10 <sup>-01</sup> |
| rs2135845  | A / G                | 0.024                             | 0.42                        | 1.03 (0.99,1.08) | 1.1x10 <sup>-01</sup> | 0.50                   | 1.01 (0.95,1.06) | 5.8x10 <sup>-01</sup> | 1.02 (0.99,1.05)    | 1.7x10 <sup>-01</sup> |
| rs3744251  | G / A                | 0.012                             | 0.25                        | 1.04 (0.97,1.11) | 2.6x10 <sup>-01</sup> | 0.08                   | 1.03 (0.93,1.13) | 2.5x10 <sup>-01</sup> | 1.03 (0.98,1.09)    | 2.3x10 <sup>-01</sup> |
| rs3027232  | G / A                | 0.027                             | 0.36                        | 1.01 (0.97,1.05) | 5.6x10 <sup>-01</sup> | 0.22                   | 1.04 (0.97,1.10) | 3.6x10 <sup>-01</sup> | 1.02 (0.98,1.05)    | 2.8x10 <sup>-01</sup> |
| rs4796492  | A / C                | 0.0023                            | 0.63                        | 0.99 (0.94,1.03) | 5.0x10 <sup>-01</sup> | 0.70                   | 0.99 (0.94,1.05) | 3.7x10 <sup>-01</sup> | 0.99 (0.95,1.02)    | 4.6x10 <sup>-01</sup> |
| rs8076718  | G / A                | 0.0097                            | 0.09                        | 1.06 (0.96,1.18) | 2.3x10 <sup>-01</sup> | 0.11                   | 0.99 (0.91,1.08) | 8.9x10 <sup>-02</sup> | 1.02 (0.96,1.09)    | 5.5x10 <sup>-01</sup> |
| rs11658922 | A / C                | 0.0096                            | 0.82                        | 0.96 (0.91,1.02) | 1.8x10 <sup>-01</sup> | 0.89                   | 1.06 (0.97,1.15) | 1.8x10 <sup>-01</sup> | 0.99 (0.94,1.04)    | 6.6x10 <sup>-01</sup> |
| rs8073152  | A / G                | 0.011                             | 0.23                        | 1.01 (0.96,1.06) | 6.0x10 <sup>-01</sup> | 0.09                   | 0.98 (0.90,1.08) | 7.7x10 <sup>-01</sup> | 1.01 (0.96,1.05)    | 7.8x10 <sup>-01</sup> |
| rs16956936 | T / C                | 0.0025                            | 0.89                        | 1.03 (0.96,1.11) | 3.9x10 <sup>-01</sup> | 0.87                   | 0.98 (0.91,1.06) | 1.1x10 <sup>-01</sup> | 1.01 (0.95,1.06)    | 7.8x10 <sup>-01</sup> |
| rs415704   | C / T                | 0.010                             | 0.50                        | 0.99 (0.94,1.03) | 5.7x10 <sup>-01</sup> | 0.34                   | 1.03 (0.97,1.09) | 5.0x10 <sup>-01</sup> | 1.00 (0.97,1.04)    | 9.1x10 <sup>-01</sup> |
| rs1567845  | G / A                | 0.019                             | 0.65                        | 1.01 (0.97,1.05) | 6.6x10 <sup>-01</sup> | 0.61                   | 0.99 (0.94,1.04) | 6.5x10 <sup>-01</sup> | 1.00 (0.97,1.03)    | 9.4x10 <sup>-01</sup> |

**(F) LRRC25 at 19p13.11 (Whole Blood)**

| SNP        | Alleles <sup>a</sup> | Proportion of Weight <sup>b</sup> | Discovery U4C Meta-analysis |                  |                       | UK Biobank Replication |                  |                        | Joint Meta-analysis |                       |
|------------|----------------------|-----------------------------------|-----------------------------|------------------|-----------------------|------------------------|------------------|------------------------|---------------------|-----------------------|
|            |                      |                                   | EAF <sup>c</sup>            | OR (95% CI)      | p-value               | EAF <sup>c</sup>       | OR (95% CI)      | p-value                | OR (95% CI)         | p-value               |
| rs11668719 | C / T                | 0.25                              | 0.5                         | 1.06 (1.01,1.11) | 1.1x10 <sup>-02</sup> | 0.54                   | 1.10 (1.05,1.16) | 1.87x10 <sup>-04</sup> | 1.08 (1.04,1.12)    | 1.2x10 <sup>-05</sup> |
| rs7257932  | A / G                | 0.091                             | 0.55                        | 1.05 (1.01,1.10) | 1.1x10 <sup>-02</sup> | 0.67                   | 1.08 (1.02,1.14) | 7.01x10 <sup>-03</sup> | 1.06 (1.03,1.10)    | 2.5x10 <sup>-04</sup> |
| rs13344313 | A / G                | 0.16                              | 0.68                        | 1.06 (1.02,1.11) | 6.6x10 <sup>-03</sup> | 0.71                   | 1.04 (0.98,1.10) | 1.95x10 <sup>-01</sup> | 1.05 (1.02,1.09)    | 3.2x10 <sup>-03</sup> |
| rs3795026  | C / T                | <0.001                            | 0.54                        | 1.04 (1.00,1.08) | 5.1x10 <sup>-02</sup> | 0.68                   | 1.05 (0.99,1.11) | 1.24x10 <sup>-01</sup> | 1.04 (1.01,1.08)    | 1.3x10 <sup>-02</sup> |
| rs7251067  | A / G                | 0.031                             | 0.85                        | 1.00 (0.95,1.06) | 9.4x10 <sup>-01</sup> | 0.86                   | 1.14 (1.06,1.23) | 6.70x10 <sup>-04</sup> | 1.05 (1.00,1.10)    | 4.1x10 <sup>-02</sup> |
| rs2303693  | T / C                | 0.13                              | 0.86                        | 1.00 (0.94,1.05) | 8.9x10 <sup>-01</sup> | 0.86                   | 1.14 (1.05,1.23) | 1.03x10 <sup>-03</sup> | 1.04 (1.00,1.10)    | 6.5x10 <sup>-02</sup> |
| rs731945   | C / T                | 0.011                             | 0.39                        | 1.04 (0.99,1.09) | 1.2x10 <sup>-01</sup> | 0.30                   | 1.03 (0.97,1.09) | 3.24x10 <sup>-01</sup> | 1.03 (1.00,1.07)    | 6.9x10 <sup>-02</sup> |
| rs2277922  | T / G                | 0.0028                            | 0.58                        | 0.97 (0.93,1.01) | 1.2x10 <sup>-01</sup> | 0.44                   | 0.99 (0.94,1.04) | 7.49x10 <sup>-01</sup> | 0.98 (0.94,1.01)    | 1.6x10 <sup>-01</sup> |
| rs7254789  | T / C                | 0.012                             | 0.39                        | 1.03 (0.98,1.09) | 2.5x10 <sup>-01</sup> | 0.18                   | 1.03 (0.96,1.10) | 4.42x10 <sup>-01</sup> | 1.03 (0.99,1.08)    | 1.7x10 <sup>-01</sup> |
| rs17211813 | C / T                | 0.0051                            | 0.10                        | 1.06 (0.96,1.17) | 2.7x10 <sup>-01</sup> | 0.13                   | 1.03 (0.95,1.11) | 4.43x10 <sup>-01</sup> | 1.04 (0.98,1.11)    | 2.0x10 <sup>-01</sup> |
| rs8103177  | G / A                | <0.001                            | 0.34                        | 0.98 (0.94,1.02) | 3.9x10 <sup>-01</sup> | 0.16                   | 0.98 (0.91,1.05) | 5.99x10 <sup>-01</sup> | 0.98 (0.95,1.02)    | 3.1x10 <sup>-01</sup> |
| rs2277921  | G / A                | <0.001                            | 0.34                        | 0.98 (0.94,1.02) | 3.9x10 <sup>-01</sup> | 0.16                   | 0.98 (0.91,1.05) | 6.10x10 <sup>-01</sup> | 0.98 (0.95,1.02)    | 3.2x10 <sup>-01</sup> |
| rs2544725  | C / A                | 0.0018                            | 0.40                        | 0.97 (0.94,1.01) | 1.7x10 <sup>-01</sup> | 0.40                   | 1.01 (0.95,1.06) | 7.99x10 <sup>-01</sup> | 0.98 (0.95,1.02)    | 3.4x10 <sup>-01</sup> |
| rs374326   | T / C                | 0.0062                            | 0.21                        | 0.97 (0.93,1.02) | 2.5x10 <sup>-01</sup> | 0.26                   | 1.00 (0.94,1.06) | 9.48x10 <sup>-01</sup> | 0.98 (0.94,1.02)    | 3.5x10 <sup>-01</sup> |
| rs17214879 | C / T                | 0.014                             | 0.86                        | 0.98 (0.91,1.04) | 4.4x10 <sup>-01</sup> | 0.81                   | 0.98 (0.92,1.05) | 6.17x10 <sup>-01</sup> | 0.98 (0.94,1.03)    | 3.7x10 <sup>-01</sup> |
| rs8108878  | T / C                | <0.001                            | 0.82                        | 1.01 (0.95,1.08) | 7.2x10 <sup>-01</sup> | 0.84                   | 0.94 (0.88,1.01) | 8.88x10 <sup>-02</sup> | 0.98 (0.94,1.03)    | 4.2x10 <sup>-01</sup> |
| rs169237   | T / C                | <0.001                            | 0.40                        | 0.98 (0.93,1.01) | 2.3x10 <sup>-01</sup> | 0.40                   | 1.01 (0.96,1.06) | 7.68x10 <sup>-01</sup> | 0.99 (0.95,1.02)    | 4.3x10 <sup>-01</sup> |
| rs8108865  | T / C                | <0.001                            | 0.82                        | 1.01 (0.95,1.08) | 7.1x10 <sup>-01</sup> | 0.84                   | 0.94 (0.88,1.01) | 9.00x10 <sup>-02</sup> | 0.98 (0.94,1.03)    | 4.3x10 <sup>-01</sup> |
| rs3212760  | A / G                | 0.0027                            | 0.38                        | 0.98 (0.94,1.03) | 4.7x10 <sup>-01</sup> | 0.39                   | 0.99 (0.94,1.04) | 7.38x10 <sup>-01</sup> | 0.99 (0.95,1.02)    | 4.4x10 <sup>-01</sup> |
| rs265558   | C / T                | 0.0039                            | 0.27                        | 0.99 (0.94,1.04) | 6.5x10 <sup>-01</sup> | 0.39                   | 0.98 (0.93,1.04) | 5.51x10 <sup>-01</sup> | 0.99 (0.95,1.02)    | 4.6x10 <sup>-01</sup> |
| rs3220     | T / C                | 0.023                             | 0.93                        | 1.04 (0.93,1.15) | 5.0x10 <sup>-01</sup> | 0.90                   | 1.01 (0.93,1.11) | 7.52x10 <sup>-01</sup> | 1.02 (0.95,1.10)    | 5.0x10 <sup>-01</sup> |
| rs17710624 | G / A                | 0.017                             | 0.65                        | 0.99 (0.94,1.03) | 5.7x10 <sup>-01</sup> | 0.64                   | 1.04 (0.99,1.10) | 1.52x10 <sup>-01</sup> | 1.01 (0.97,1.04)    | 6.4x10 <sup>-01</sup> |
| rs4808795  | G / A                | 0.0099                            | 0.25                        | 1.02 (0.97,1.07) | 4.9x10 <sup>-01</sup> | 0.23                   | 0.99 (0.93,1.06) | 8.69x10 <sup>-01</sup> | 1.01 (0.97,1.05)    | 6.6x10 <sup>-01</sup> |
| rs8103912  | C / T                | 0.021                             | 0.52                        | 1.02 (0.97,1.06) | 4.7x10 <sup>-01</sup> | 0.37                   | 0.96 (0.91,1.01) | 1.50x10 <sup>-01</sup> | 0.99 (0.96,1.03)    | 7.4x10 <sup>-01</sup> |
| rs1804826  | G / T                | 0.0092                            | 0.26                        | 1.01 (0.97,1.06) | 6.0x10 <sup>-01</sup> | 0.23                   | 0.99 (0.93,1.05) | 7.27x10 <sup>-01</sup> | 1.00 (0.97,1.04)    | 8.3x10 <sup>-01</sup> |
| rs12459566 | C / T                | 0.072                             | 0.69                        | 1.04 (1.00,1.08) | 7.8x10 <sup>-02</sup> | 0.67                   | 0.95 (0.90,1.00) | 4.81x10 <sup>-02</sup> | 1.00 (0.97,1.04)    | 8.5x10 <sup>-01</sup> |
| rs3746183  | A / C                | 0.0076                            | 0.74                        | 1.00 (0.95,1.05) | 1.0e+00               | 0.85                   | 1.01 (0.94,1.09) | 7.31x10 <sup>-01</sup> | 1.00 (0.96,1.04)    | 8.5x10 <sup>-01</sup> |
| rs6512265  | G / A                | 0.0044                            | 0.72                        | 1.03 (0.98,1.07) | 2.8x10 <sup>-01</sup> | 0.66                   | 0.96 (0.91,1.01) | 1.19x10 <sup>-01</sup> | 1.00 (0.96,1.03)    | 8.6x10 <sup>-01</sup> |
| rs11672054 | A / G                | 0.0069                            | 0.90                        | 1.00 (0.91,1.09) | 9.3x10 <sup>-01</sup> | 0.87                   | 1.01 (0.93,1.09) | 8.08x10 <sup>-01</sup> | 1.00 (0.94,1.06)    | 9.0x10 <sup>-01</sup> |
| rs8101804  | T / C                | 0.050                             | 0.70                        | 1.03 (0.99,1.08) | 1.7x10 <sup>-01</sup> | 0.66                   | 0.95 (0.90,1.00) | 5.91x10 <sup>-02</sup> | 1.00 (0.96,1.03)    | 9.5x10 <sup>-01</sup> |
| rs17724992 | A / G                | 0.0077                            | 0.32                        | 1.00 (0.95,1.04) | 8.5x10 <sup>-01</sup> | 0.27                   | 1.01 (0.95,1.07) | 7.36x10 <sup>-01</sup> | 1.00 (0.96,1.04)    | 9.6x10 <sup>-01</sup> |
| rs4808652  | G / A                | <0.001                            | 0.34                        | 1.01 (0.96,1.06) | 7.8x10 <sup>-01</sup> | 0.07                   | 0.97 (0.88,1.08) | 6.14x10 <sup>-01</sup> | 1.00 (0.96,1.04)    | 9.7x10 <sup>-01</sup> |
| rs12459782 | T / C                | 0.050                             | 0.70                        | 1.03 (0.99,1.08) | 1.6x10 <sup>-01</sup> | 0.66                   | 0.95 (0.90,1.00) | 6.39x10 <sup>-02</sup> | 1.00 (0.97,1.03)    | 9.8x10 <sup>-01</sup> |

Abbreviations: CI: confidence interval; EAF: effect allele frequency; OR: odds ratio; SNP: single nucleotide polymorphism; U4C: Up for a Challenge

<sup>a</sup> Reference allele / effect allele

<sup>b</sup> Proportion of total weight attributed to SNP in gene prediction model

<sup>c</sup> Effect allele frequency in controls
