# Supplementary material for: Cis-eQTL-based trans-ethnic meta-analysis reveals novel genes associated with breast cancer risk
Source: PubMed Central journal article supplement (PMC5391966; doi:10.1371/journal.pgen.1006690), 2017-03-31
Supplement: pgen.1006690.s003.pdf [file pgen.1006690.s003.pdf]

| <b>Dataset (Source Dataset)</b>                 | <b>Race / Ethnicity</b> | <b># PC Outliers Excluded</b> |
|-------------------------------------------------|-------------------------|-------------------------------|
| <i>Discovery</i>                                |                         |                               |
| AABC (AABC)                                     | African                 | 0                             |
| African (African Diaspora)                      | African                 | 23                            |
| African American / Barbadian (African Diaspora) | African                 | 1                             |
| CGEMS (CGEMS)                                   | European                | 6                             |
| CPSII (BPC3)                                    | European                | 0                             |
| EPIC (BPC3)                                     | European                | 7                             |
| Latina Admixture (Latina Admixture)             | Latina                  | 9                             |
| MEC – European (BPC3)                           | European                | 2                             |
| MEC – Japanese (MEC)                            | East Asian              | 51                            |
| MEC – Latina (MEC)                              | Latina                  | 12                            |
| NHS2 (BPC3)                                     | European                | 0                             |
| PBCS (BPC3)                                     | European                | 8                             |
| PLCO (BPC3)                                     | European                | 0                             |
| Shanghai (Shanghai)                             | East Asian              | 51                            |
| <i>Replication</i>                              |                         |                               |
| UK Biobank                                      | European                | 335                           |
