# Supplementary material for: Cis-eQTL-based trans-ethnic meta-analysis reveals novel genes associated with breast cancer risk
Source: PubMed Central journal article supplement (PMC5391966; doi:10.1371/journal.pgen.1006690), 2017-03-31
Supplement: pgen.1006690.s004.pdf [file pgen.1006690.s004.pdf]

**(A) *RCCD1* at 15q26.1**

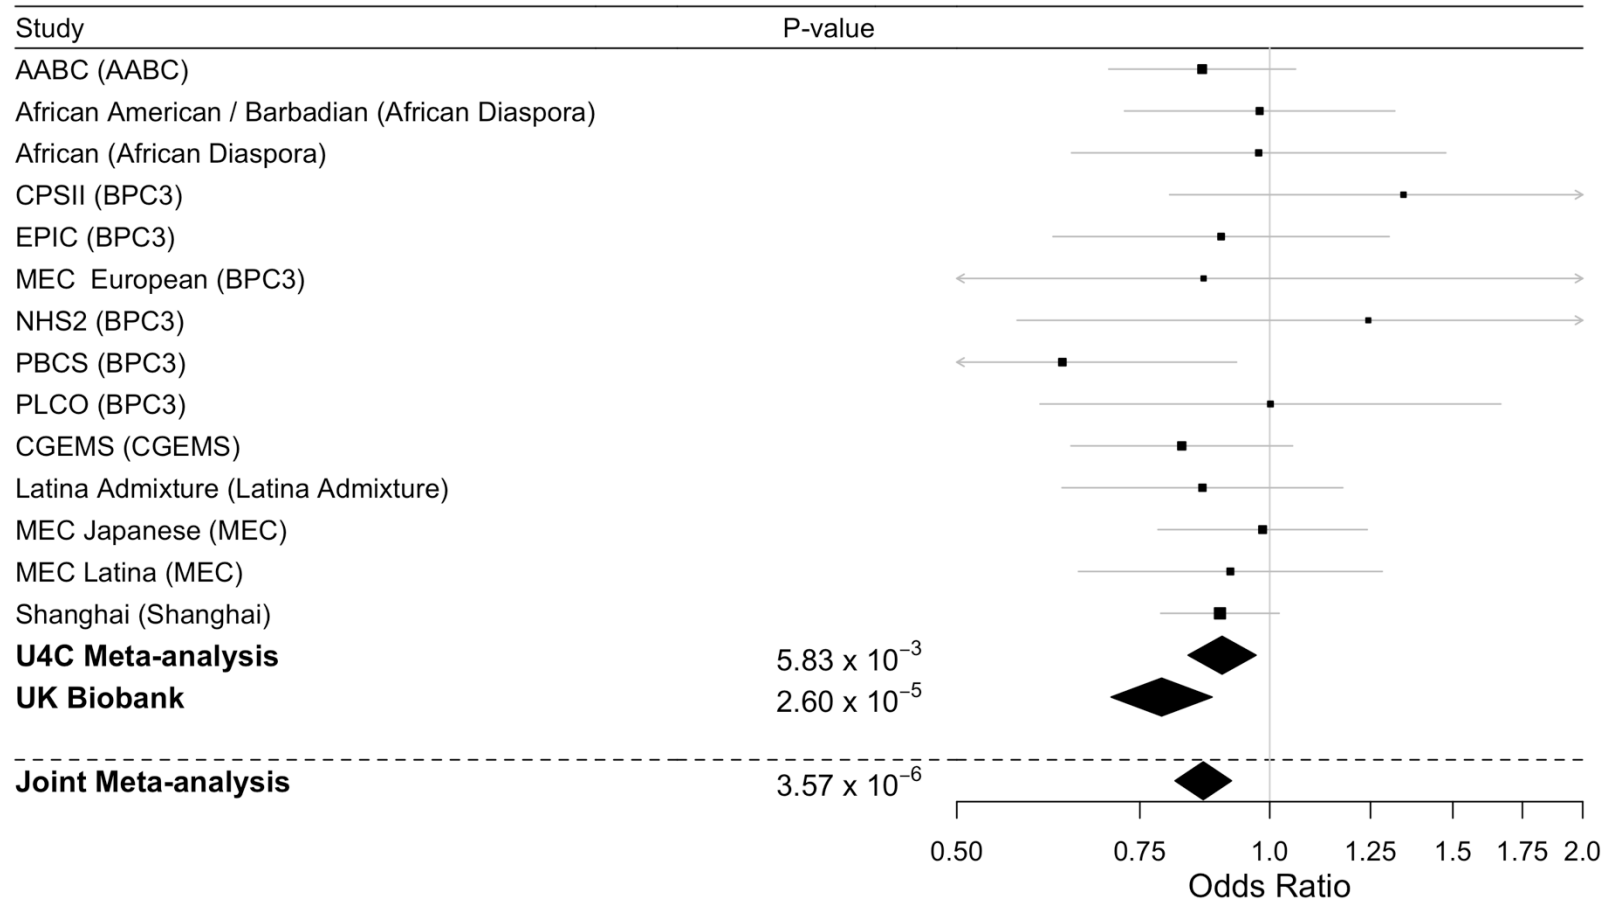

**(B) DHODH at 16q22.2**

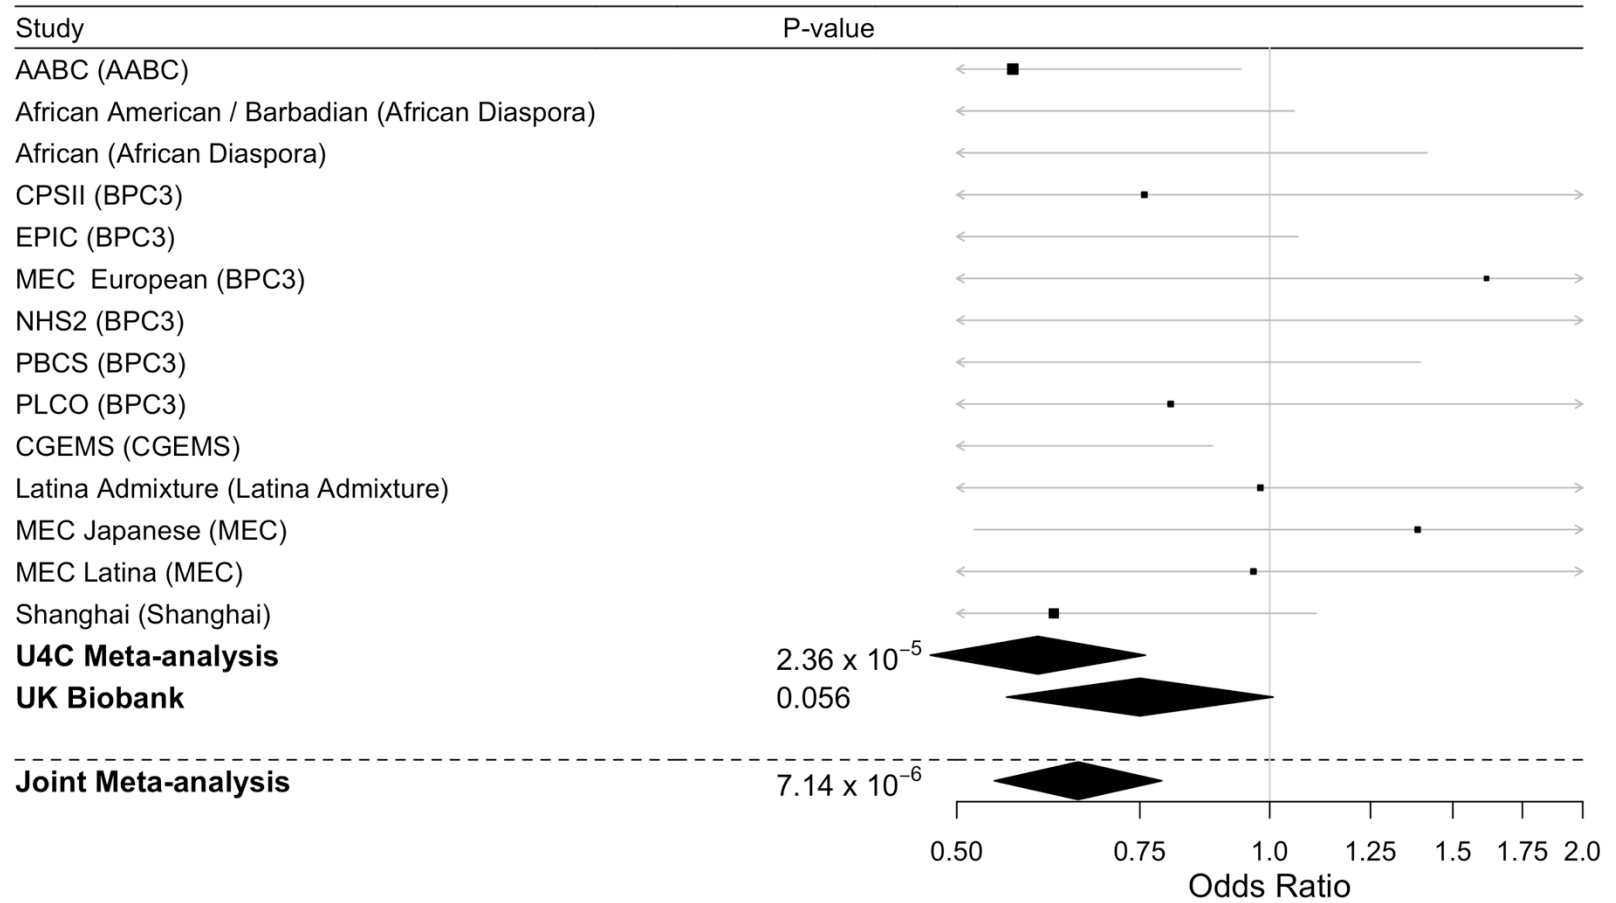

**(C) ANKLE1 at 19p13.11**

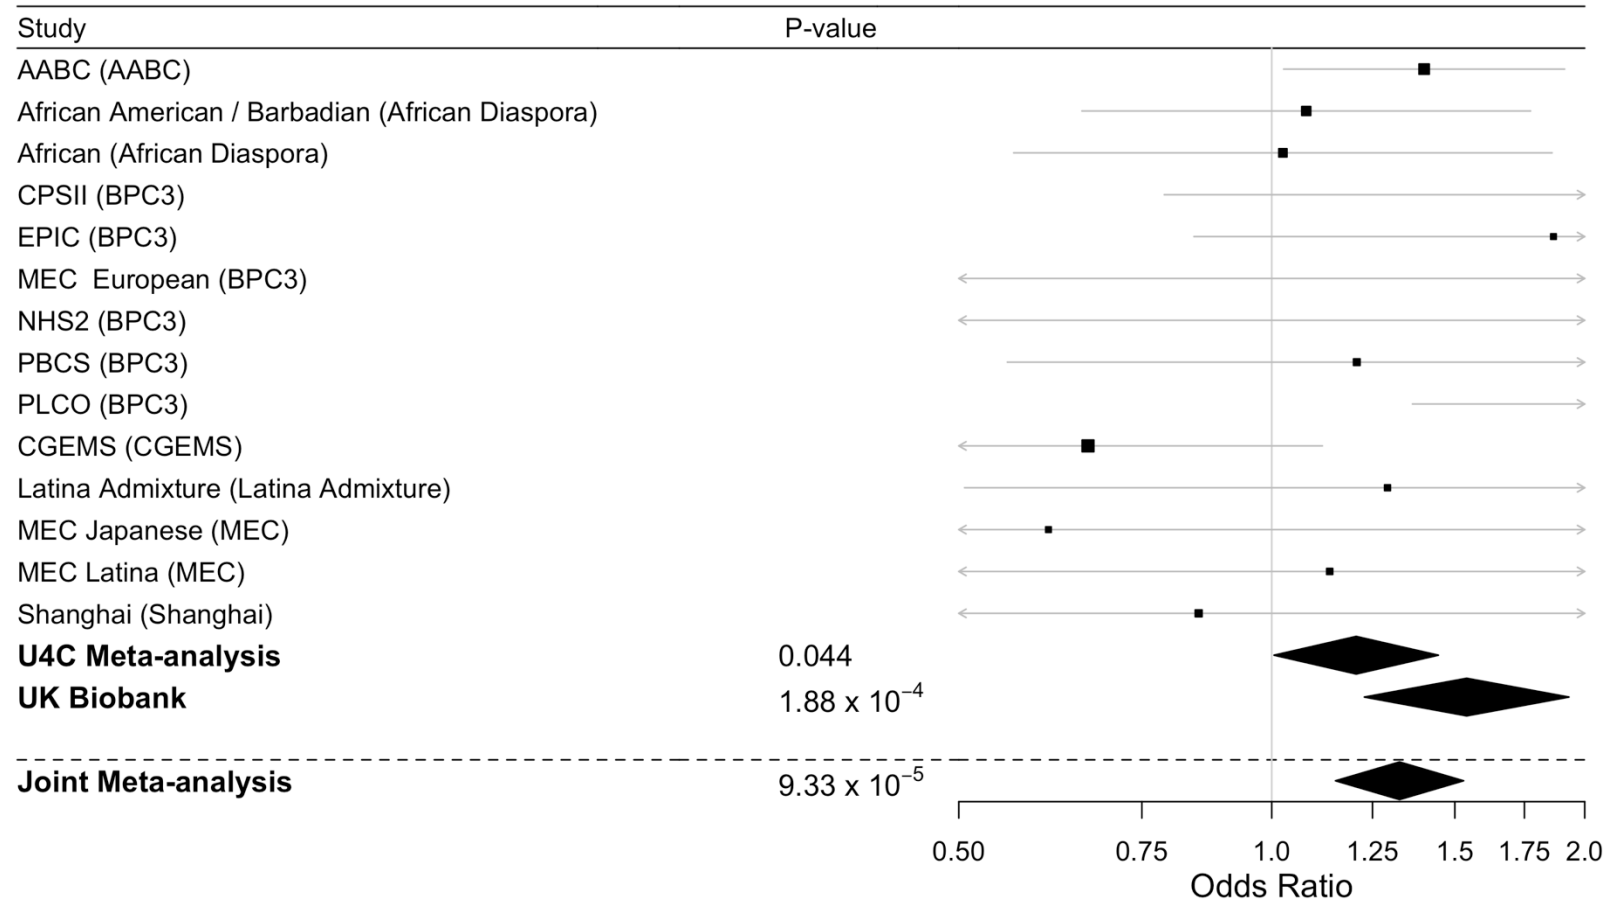

Note: the size of the boxes reflects the size of each study.

Abbreviations: AABC: African American Breast Cancer GWAS; African Diaspora: GWAS of Breast Cancer in the African Diaspora; BPC3: Breast and Prostate Cancer Cohort Consortium GWAS; CGEMS: Cancer Genetic Markers of Susceptibility Breast Cancer GWAS; CPSII: Cancer Prevention Study II; EPIC: European Prospective Investigation into Cancer and Nutrition; GWAS: genomx10-wide association study; Latina Admixture: Admixture Mapping for Breast Cancer in Latinas; MEC: Multiethnic Cohort GWAS in African

Americans, Latinos, and Japanese; NHS2: Nurses' Health Study 2; PBCS: Polish Breast Cancer Study; PLCO: Prostate, Lung, Colorectal, and Ovarian Cancer Screening Trial; Shanghai: Shanghai Breast Cancer Genetics Study; U4C: Up for a Challenge
