# Supplementary material for: Cis-eQTL-based trans-ethnic meta-analysis reveals novel genes associated with breast cancer risk
Source: PubMed Central journal article supplement (PMC5391966; doi:10.1371/journal.pgen.1006690), 2017-03-31
Supplement: pgen.1006690.s006.pdf [file pgen.1006690.s006.pdf]

(A) Imputed expression based on breast tissue

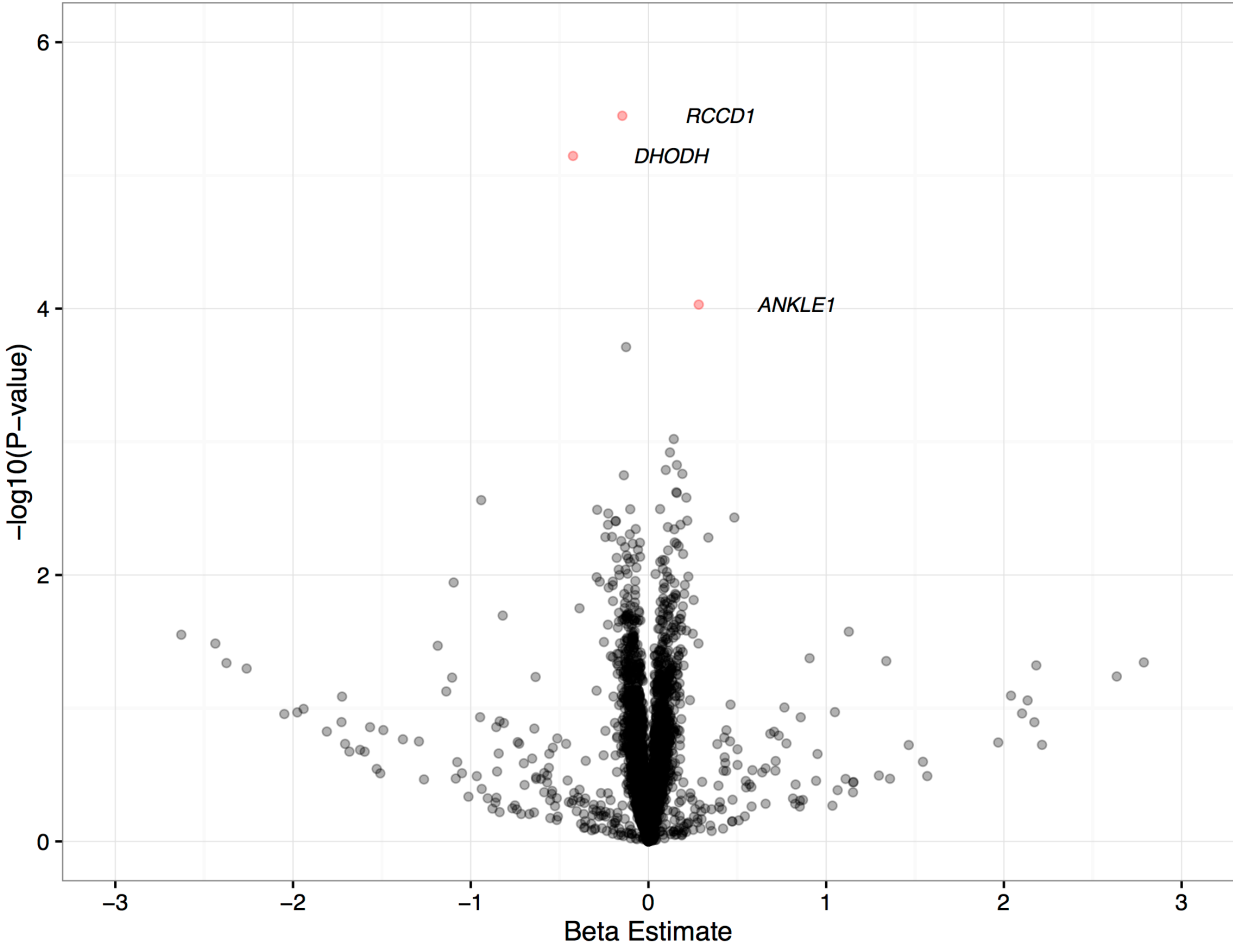

**(B) Imputed expression based on whole blood**

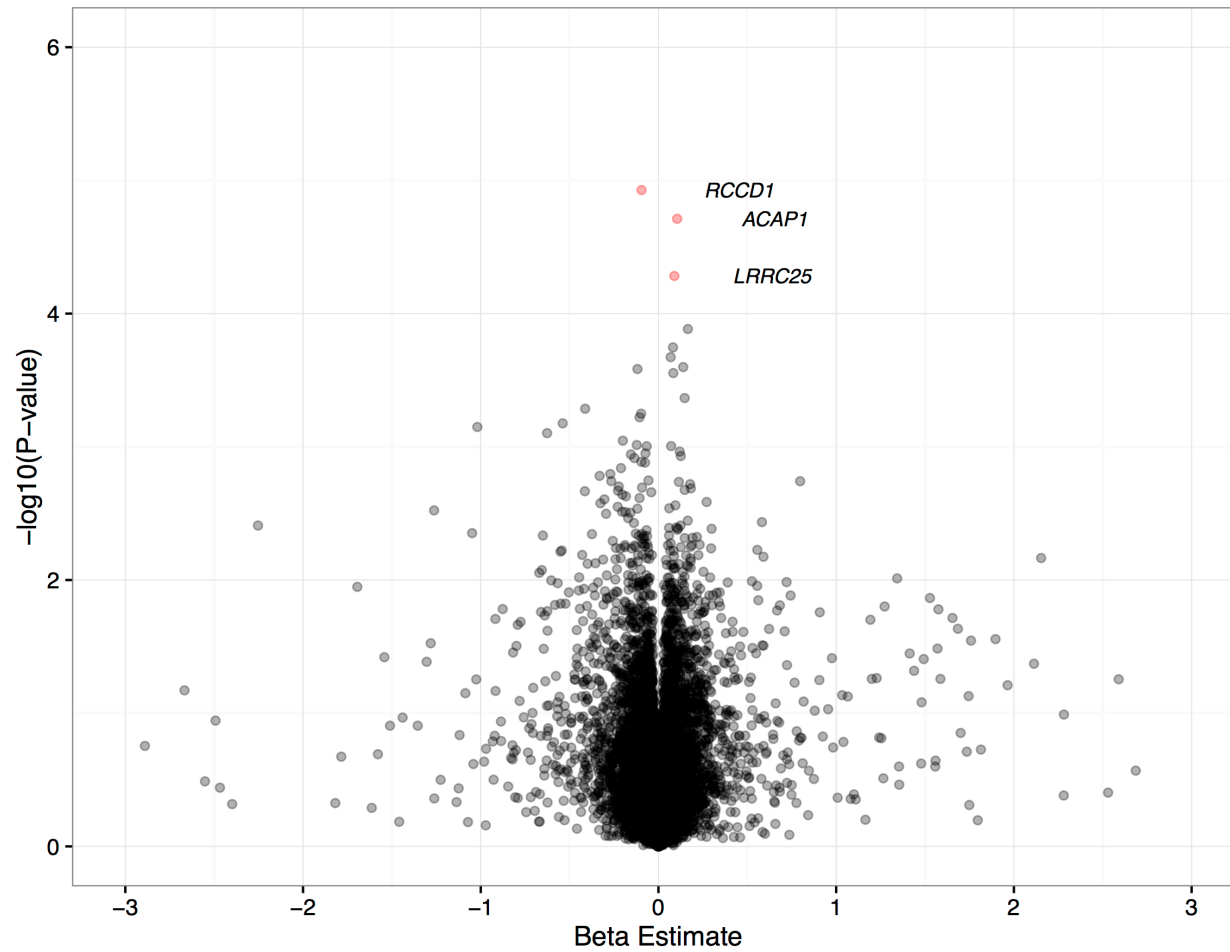

The x-axis displays the beta effect sizes for associations between gene expression and breast cancer risk. The y-axis displays  $-\log_{10}(p\text{-values})$  as a measure of statistical significance.
